# Supplementary material
Source: Research Square preprint supplement (doi:10.21203/rs.3.rs-9013883/v1)
Supplement: Supplementary file 1 [file 500c4d88417b2f356d8f8b8a.docx]

**Maternal Vaccination against COVID-19, Influenza, Pertussis, and Respiratory Syncytial Virus: A Scoping Review**

**Supplementary Material**

## Supplementary information 1: Publications excluded by full text

**Ineligible study population (n = 59)**

1 Aharon, D. *et al.* In Vitro Fertilization and Early Pregnancy Outcomes After Coronavirus Disease 2019 (COVID-19) Vaccination. *Obstet. Gynecol.* **139**, 490-497 (2022). https://doi.org:10.1097/AOG.0000000000004713

2 Aldrete-Cortez, V. *et al.* Infants prenatally exposed to SARS-CoV-2 show the absence of fidgety movements and are at higher risk for neurological disorders: A comparative study. *PLoS One* **17**, e0267575 (2022). https://doi.org:10.1371/journal.pone.0267575

3 Amin, A. B. *et al.* Immunogenicity of influenza vaccines administered to pregnant women in randomized clinical trials in Mali and South Africa. *Vaccine* **38**, 6478-6483 (2020). https://doi.org:10.1016/j.vaccine.2020.07.020

4 Anonymous. (2024).

5 Argondizo Correia, C. *et al.* Gestational pertussis vaccination and the infants cellular immune response against whole-cell pertussis vaccine in the first year of life. *bioRxiv* (2019). https://doi.org:10.1101/697722

6 Behnaz, A., Hossein, M., Morteza, H., Hassanidarmian, G. & Susefidi, Z. M. Examining the Effect of Parental COVID‐19 Vaccination Prior to Birth and the Association Between COVID‐19 and Cancer in Children Under Six. *The International journal of health planning and management* **40**, 311-321 (2024). https://doi.org:10.1002/hpm.3869

7 Beladiya, J. *et al.* Safety and efficacy of COVID-19 vaccines: A systematic review and meta-analysis of controlled and randomized clinical trials. *Rev. Med. Virol.* **34**, e2507 (2024). https://doi.org:10.1002/rmv.2507

8 Bosworth, M. L. *et al.* Vaccine effectiveness for preventing COVID-19 hospital admission during pregnancy: a population-based cohort study in England during the Alpha and Delta waves of the SARS-CoV-2 pandemic. *medRxiv* (2022). https://doi.org:10.1101/2022.09.27.22280397

9 Bosworth, M. L. *et al.* Vaccine effectiveness for prevention of covid-19 related hospital admission during pregnancy in England during the alpha and delta variant dominant periods of the SARS-CoV-2 pandemic: population based cohort study. *BMJ Medicine* **2**, e000403 (2023). https://doi.org:10.1136/bmjmed-2022-000403

10 Cambou, M. C. *et al.* Longitudinal Evaluation of Antibody Persistence in Mother-Infant Dyads After Severe Acute Respiratory Syndrome Coronavirus 2 Infection in Pregnancy. *J. Infect. Dis.* **227**, 236-245 (2023). https://doi.org:10.1093/infdis/jiac366

11 Cao, M. *et al.* Inactivated Covid-19 vaccine did not undermine live birth and neonatal outcomes of women with frozen-thawed embryo transfer. *Hum. Reprod.* **37**, 2942-2951 (2022). https://doi.org:10.1093/humrep/deac220

12 Castagnini, L. A. *et al.* Impact of maternal postpartum tetanus and diphtheria toxoids and acellular pertussis immunization on infant pertussis infection. *Clin. Infect. Dis.* **54**, 78-84 (2012). https://doi.org:10.1093/cid/cir765

13 Condon, M., Smith, N., Ayyash, M. & Goyert, G. The impact of COVID-19 vaccinations on stillbirth rates among pregnant women in the Metro-Detroit area. *J. Natl. Med. Assoc.* **115**, 15-17 (2023). https://doi.org:10.1016/j.jnma.2022.12.008

14 De Rose, D. U., Salvatori, G., Dotta, A. & Auriti, C. SARS-CoV-2 Vaccines during Pregnancy and Breastfeeding: A Systematic Review of Maternal and Neonatal Outcomes. *Viruses* **14**, 05 (2022). https://doi.org:10.3390/v14030539

15 Demicheli, V., Jefferson, T., Ferroni, E., Rivetti, A. & Di Pietrantonj, C. Vaccines for preventing influenza in healthy adults. *Cochrane Database Syst. Rev.* **2**, CD001269 (2018). https://doi.org:10.1002/14651858.CD001269.pub6

16 Eid, J. *et al.* Decreased severity of COVID-19 in vaccinated pregnant individuals during predominance of different SARS-CoV-2 variants. *Am. J. Reprod. Immunol.* **88**, e13596 (2022). https://doi.org:10.1111/aji.13596

17 Gandhi, A. P. *et al.* COVID-19 vaccination uptake and adverse events following COVID-19 immunization in pregnant women in Northern India: a prospective, comparative, cohort study. *Journal of Rural Medicine* **17**, 228-235 (2022). https://doi.org:10.2185/jrm.2022-025

18 Gigase, F. A. J. *et al.* The effect of SARS-CoV-2 infection and vaccination on Th17 and regulatory T cells in a pregnancy cohort in NYC. *Front. Immunol.* **15**, 1350288 (2024). https://doi.org:10.3389/fimmu.2024.1350288

19 Healy, C. M., Rench, M. A. & Baker, C. J. Importance of timing of maternal combined tetanus, diphtheria, and acellular pertussis (Tdap) immunization and protection of young infants. *Clin. Infect. Dis.* **56**, 539-544 (2013). https://doi.org:10.1093/cid/cis923

20 Horiya, M. *et al.* Efficacy of double vaccination with the 2009 pandemic influenza A (H1N1) vaccine during pregnancy. *Obstet. Gynecol.* **118**, 887-894 (2011). https://doi.org:10.1097/AOG.0b013e31822e5c02

21 Huang, J. *et al.* Impact of inactivated SARS-CoV-2 vaccination on embryo ploidy: a retrospective cohort study of 133 PGT-A cycles in China. *Biol. Res.* **55**, 26 (2022). https://doi.org:10.1186/s40659-022-00395-1

22 Jaber, H. M., Ebdah, S., Al Haj Mahmoud, S. A., Abu-Qatouseh, L. & Jaber, Y. H. Comparison of T cells mediated immunity and side effects of mRNA vaccine and conventional COVID-19 vaccines administrated in Jordan. *Human Vaccines and Immunotherapeutics* **20** (2024). https://doi.org:10.1080/21645515.2024.2333104

23 Joo, J. *et al.* Epidemiologic Characteristics of Pandemic H1N1 Influenza in 2009: An Observational Study at a Single Emergency Department. *Journal of the Korean Society of Emergency Medicine*, 858-866 (2010).

24 Kaur, R. J. *et al.* Adverse Events Reported From COVID-19 Vaccine Trials: A Systematic Review. *Indian J. Clin. Biochem.* **36**, 427-439 (2021). https://doi.org:10.1007/s12291-021-00968-z

25 Kissling, E. *et al.* Influenza vaccine effectiveness estimates in Europe in a season with three influenza type/subtypes circulating: The I-MOVE multicentre case-control study, influenza season 2012/13. *Eurosurveillance* **19** (2014). https://doi.org:10.2807/1560-7917.ES2014.19.6.20701

26 LaCourse, S. M. *et al.* Hybrid immunity to SARS-CoV-2 during pregnancy provides more durable infant antibody responses compared to natural infection alone. *J. Infect. Dis.* **21**, 21 (2023). https://doi.org:10.1093/infdis/jiad592

27 Li, M. *et al.* Transplacental transfer efficiency of maternal antibodies against influenza A(H1N1)pdm09 virus and dynamics of naturally acquired antibodies in Chinese children: a longitudinal, paired mother-neonate cohort study. *The Lancet. Microbe* **4**, e893-e902 (2023). https://doi.org:10.1016/S2666-5247(23)00181-7

28 Liu, S. *et al.* Maternal antibody transfer rate of vaccination against SARS-CoV-2 before or during early pregnancy and its protective effectiveness on offspring. *J. Med. Virol.* **95**, e29125 (2023). https://doi.org:10.1002/jmv.29125

29 Mackenzie, I. S. *et al.* Influenza H1N1 (swine flu) vaccination: A safety surveillance feasibility study using self-reporting of serious adverse events and pregnancy outcomes. *Br. J. Clin. Pharmacol.* **73**, 801-811 (2012). https://doi.org:10.1111/j.1365-2125.2011.04142.x

30 Maertens, K. *et al.* Pertussis vaccination during pregnancy in Belgium: Follow-up of infants until 1 month after the fourth infant pertussis vaccination at 15 months of age. *Vaccine* **34**, 3613-3619 (2016). https://doi.org:10.1016/j.vaccine.2016.04.066

31 Maghsoudi, M., Keivanfar, M., Daniali, S. S. & Kelishadi, R. The association of COVID- 19 parental immunization and transmission of disease to offspring: a retrospective study. *Ital. J. Pediatr.* **51**, 131 (2025). https://doi.org:https://dx.doi.org/10.1186/s13052-025-01948-2

32 Magnus, M. C. *et al.* Pregnancy Status at the Time of Coronavirus Disease 2019 Vaccination and Incidence of Severe Acute Respiratory Syndrome Coronavirus 2 Infection. *Clin. Infect. Dis.* **76**, 57-65 (2023). https://doi.org:10.1093/cid/ciac739

33 Man, O. M. *et al.* Respiratory distress in SARS-CoV-2 exposed uninfected neonates followed in the COVID Outcomes in Mother-Infant Pairs (COMP) Study. *Nature communications* **15**, 399 (2024). https://doi.org:10.1038/s41467-023-44549-5

34 Maternity, S. F. & Infant Hospital. Does Covid-19 Vaccination in Patients Undergoing in Vitro Fertilization Affect the Live Birth Rate of Their First Embryo Transfer Cycle: A Prospective Cohort Study. *https://clinicaltrials.gov/study/NCT05063942* (2021). <https://www.epistemonikos.org/en/documents/94d051ea28649165470e72f624a2f74cb1aaccce>.

35 Michiels, B., Govaerts, F., Remmen, R., Vermeire, E. & Coenen, S. A systematic review of the evidence on the effectiveness and risks of inactivated influenza vaccines in different target groups. *Vaccine* **29**, 9159-9170 (2011). https://doi.org:10.1016/j.vaccine.2011.08.008

36 Minervax Ap, S. (2024).

37 Mustafa, Z. U. *et al.* Short-term adverse effects of COVID-19 vaccines after the first, second, and booster doses: a cross-sectional survey from Punjab, Pakistan, and the implications. *Rev. Soc. Bras. Med. Trop.* **56**, e0044 (2023). https://doi.org:10.1590/0037-8682-0044-2023

38 Odhiambo, D. B. *et al.* Active vaccine safety surveillance: Experience from a prospective cohort event monitoring study of COVID-19 vaccines in Kenya. *medRxiv* (2025). https://doi.org:10.1101/2025.02.18.25322051

39 Piñeyro, M. O. S. *et al.* The Effect of the SARS CoV-2 Vaccine on Assisted Reproductive Technology Outcomes, A Cohort Study. *SSRN* (2023). https://doi.org:10.2139/ssrn.4401645

40 Pontiroli, A. E. *et al.* Vaccination against influenza viruses reduces infection, not hospitalization or death, from respiratory COVID-19: A systematic review and meta-analysis. *J. Med. Virol.* **96**, e29343 (2024). https://doi.org:10.1002/jmv.29343

41 Puthanakit, T. *et al.* Infant Responses to Primary Immunization Following Vaccination in Pregnancy With Varying Doses of Recombinant Acellular Pertussis Vaccine Alone or Combined With Tetanus-Diphtheria. *Pediatr. Infect. Dis. J.* **44**, S56-S60 (2025). https://doi.org:https://dx.doi.org/10.1097/INF.0000000000004609

42 Rao, S., Alishahi, M., De Crescenzo, L. & Dempsey, A. F. A population-based study of maternal and infant factors influencing influenza vaccination among young children born in Colorado from 2008 to 2016. *Vaccine* **37**, 1293-1298 (2019). https://doi.org:10.1016/j.vaccine.2019.01.054

43 Regan, A. K. *et al.* Risk of Miscarriage in Relation to Seasonal Influenza Vaccination Before or During Pregnancy. *Obstet. Gynecol.* **142**, 625-635 (2023). https://doi.org:10.1097/AOG.0000000000005279

44 Saad, R. K. *et al.* Burden of pertussis in infants in the Eastern Mediterranean Region and the impact of maternal vaccination: a systematic review. *BMC Public Health* **25**, 268 (2025). https://doi.org:10.1186/s12889-025-21329-y

45 Schwarz, T. F. *et al.* Immunogenicity and Safety of 3 Formulations of a Respiratory Syncytial Virus Candidate Vaccine in Nonpregnant Women: A Phase 2, Randomized Trial. *J. Infect. Dis.* **220**, 1816-1825 (2019). https://doi.org:10.1093/infdis/jiz395

46 Sereeyothin, C., Kerr, S. J., Poovorawan, Y., Maertens, K. & Wanlapakorn, N. The effect of preexisting antibodies from Tdap vaccination during pregnancy on infant antibody responses to the pertussis-containing vaccines. *Hum. Vaccin. Immunother.* **21**, 2575638 (2025). https://doi.org:https://dx.doi.org/10.1080/21645515.2025.2575638

47 Sievers, B. L. *et al.* Magnitude and breadth of neutralizing antibody responses elicited by SARS-CoV-2 infection or vaccination. *medRxiv* (2022). https://doi.org:10.1101/2021.12.30.21268540

48 Veerus, P., Nomm, O., Innos, K., Allvee, K. & Karro, H. SARS-CoV-2 infection during pregnancy and perinatal outcomes in Estonia in 2020 and 2021: A register-based study. *Acta Obstet. Gynecol. Scand.* **103**, 250-256 (2024). https://doi.org:10.1111/aogs.14721

49 Wan, Q. *et al.* Inactivated COVID-19 Vaccination did not affect In vitro fertilization (IVF) / Intra-Cytoplasmic Sperm Injection (ICSI) cycle outcomes. *Arxiv* (2023). https://doi.org:arXiv:2306.07652

50 Yang, C. *et al.* Inactivated COVID-19 vaccines in peri-pregnancy period: Evaluation of safety for both pregnant women and neonates. *Vaccine* **41**, 7450-7459 (2023). https://doi.org:10.1016/j.vaccine.2023.11.011

51 Yang, Y. *et al.* Pregnancy outcomes following natural conception and assisted reproduction treatment in women who received COVID-19 vaccination prior to conception: a population-based cohort study in China. *Frontiers in Medicine* **10**, 1250165 (2023). https://doi.org:10.3389/fmed.2023.1250165

52 Yildiz, E., Timur, B., Guney, G. & Timur, H. Does the SARS-CoV-2 mRNA vaccine damage the ovarian reserve? *Medicine* **102**, e33824 (2023). https://doi.org:10.1097/MD.0000000000033824

53 Yin, K. *et al.* Pregnancy and lactation induce distinct immune responses to COVID-19 booster vaccination and SARS-CoV-2 breakthrough infection. *JCI insight* **10** (2025). https://doi.org:10.1172/jci.insight.191930

54 Zelini, P. *et al.* Inflammatory and Immune Responses during SARS-CoV-2 Infection in Vaccinated and Non-Vaccinated Pregnant Women and Their Newborns. *Pathogens* **12** (2023). https://doi.org:10.3390/pathogens12050664

55 Zhang, H. *et al.* Humoral immune response characteristics of vulnerable populations against SARS-CoV-2 strains EG.5 and JN.1 after infection with strains BA.5 and XBB. *Arch. Virol.* **170**, 82 (2025). https://doi.org:10.1007/s00705-025-06248-y

56 Zhang, L., Sun, X., Wang, R. & Ma, F. Effect of COVID-19 vaccination on the outcome of in vitro fertilization: A systematic review and meta-analysis. *Frontiers in Public Health* **11**, 1151999 (2023). https://doi.org:10.3389/fpubh.2023.1151999

57 Zhang, X. L., Chen, Y. H., Zhang, S. P., Wu, X. Q. & Wang, X. P. Effects of the Severe Acute Respiratory Syndrome Coronavirus 2 Inactivated Vaccine on the Outcome of Frozen Embryo Transfers: A Large Scale Clinical Study. *International Journal of Women's Health* **15**, 1305-1316 (2023). https://doi.org:10.2147/IJWH.S407773

58 Zhao, Y. *et al.* No association of vaccination with inactivated COVID-19 vaccines before conception with pregnancy complications and adverse birth outcomes: A cohort study of 5457 Chinese pregnant women. *J. Med. Virol.* **95**, e28735 (2023). https://doi.org:10.1002/jmv.28735

59 Zhao, Y. *et al.* Association of COVID-19 vaccination before conception with maternal thyroid function during early pregnancy: A single-center study in China. *J. Med. Virol.* **95**, e28245 (2023). https://doi.org:10.1002/jmv.28245

**Ineligible intervention (n = 34)**

1. Aiob A, Shqara RA, Mikhail SM, Sharon A, Odeh M, Lowenstein L. The impact of the COVID-19 pandemic on ectopic pregnancy presentation and treatment: A retrospective cohort study. Journal of Gynecology Obstetrics and Human Reproduction. 2023;52(1):102508. DOI: 10.1016/j.jogoh.2022.102508.

2. Borren I, Tambs K, Gustavson K, Schjolberg S, Eriksen W, Haberg SE, et al. Early prenatal exposure to pandemic influenza A (H1N1) infection and child psychomotor development at 6months - A population-based cohort study. Early Hum Dev. 2018;122:1-7. DOI: 10.1016/j.earlhumdev.2018.05.005.

3. Buchwald AG, Graham BS, Traore A, Haidara FC, Chen M, Morabito K, et al. Respiratory Syncytial Virus (RSV) Neutralizing Antibodies at Birth Predict Protection from RSV Illness in Infants in the First 3 Months of Life. Clin Infect Dis. 2021;73(11):e4421-e7. DOI: 10.1093/cid/ciaa648.

4. Cabore RN, Maertens K, Dobly A, Leuridan E, Van Damme P, Huygen K. Influence of maternal vaccination against diphtheria, tetanus, and pertussis on the avidity of infant antibody responses to a pertussis containing vaccine in Belgium. Virulence. 2017;8(7):1245-54. DOI: 10.1080/21505594.2017.1296998.

5. Carlson J, Simeone R, Ellington S, Galang R, DeSisto C, Fleming-Dutra K, et al. COVID-19-related Health Outcomes during Delivery Hospitalization During Pre-delta, Delta, and Omicron Periods. Research Square. 2023. DOI: 10.21203/rs.3.rs-3346406/v1.

6. Changizi N, Eshrati B, Salehi M, Beheshtian M, Hadipour Jahromy L, Emami Afshar N, et al. Vaccination effects on reducing COVID-19 complications in pregnancy: A large-scale report from Iran. Int J Gynaecol Obstet. 2023;163(3):1012-7. DOI: 10.1002/ijgo.15077.

7. Edward M, Mark H, Jay B, Trace G, Julia T, Kimberly B, et al. Pregnancy and neonatal outcomes of COVID-19, co-reporting of common outcomes from the PAN-COVID and AAP SONPM registry. medRxiv. 2021. DOI: 10.1101/2021.01.06.21249325.

8. Falsaperla R, Leone G, Familiari M, Ruggieri M. COVID-19 vaccination in pregnant and lactating women: a systematic review. Expert Review of Vaccines. 2021;20(12):1619-28. DOI: 10.1080/14760584.2021.1986390.

9. Filho JQ, Junior FS, Lima TB, Viana VA, Burgoa JS, Soares AM, et al. Asynchronous influenza vaccination and adverse maternal-child health outcomes in the Brazilian semiarid, 2013 to 2018: the INFLUEN-SA Study. medRxiv. 2020. DOI: 10.1101/2020.08.24.20180455.

10. Huang J, Fang Z, Liu Y, Xing C, Huang L, Mao J, et al. Effect of female coronavirus disease 2019 vaccination on assisted reproductive outcomes: a systematic review and meta-analysis. Fertil Steril. 2023;119(5):772-83. DOI: 10.1016/j.fertnstert.2023.01.024.

11. Immink MM, Koole S, Bekker MN, Groenendaal F, Kemmeren JM, de Melker HE, et al. Background incidence rates of adverse pregnancy outcomes in the Netherlands: Data of 2006-2018. Eur J Obstet Gynecol Reprod Biol. 2021;256:274-80. DOI: 10.1016/j.ejogrb.2020.11.064.

12. Jaswa EG, Huddleston HG, Lindquist KJ, Wu AHB, Bishop SL, Kim YS, et al. In Utero Exposure to Maternal COVID-19 and Offspring Neurodevelopment Through Age 24 Months. JAMA network open. 2024;7(10):e2439792. DOI: 10.1001/jamanetworkopen.2024.39792.

13. Kostinov MP, Cherdantsev AP, Kuselman AI, Akhmatova NK, Kostinova AM, Deryabina EV, et al. Prospective randomized open-label comparative study of immunogenicity after subunit and polymeric subunit influenza vaccines administration among mothers and infants. Hum Vaccin Immunother. 2018;14(12):2971-8. DOI: 10.1080/21645515.2018.1507585.

14. Lasky T, McMahon AW, Hua W, Forshee R. Methodologic approaches in studies using real-world data (RWD) to measure pediatric safety and effectiveness of vaccines administered to pregnant women: A scoping review. Vaccine. 2021;39(29):3814-24. DOI: 10.1016/j.vaccine.2021.05.071.

15. Leet D, Jin J, Craik CS, Kattah MG, Long MD, Mahadevan U. Post-vaccination SARS-CoV-2 neutralizing antibodies in pregnant women receiving biologics for inflammatory bowel disease. medRxiv. 2025. DOI: 10.1101/2025.03.05.25323433.

16. Li XF, Zhang YJ, Yao YL, Chen MX, Wang LL, Wang MD, et al. The Association of Post Embryo Transfer SARS-CoV-2 Infection on Early Pregnancy Outcomes in In Vitro Fertilization: A Prospective Cohort Study. Am J Obstet Gynecol. 2023. DOI: 10.1016/j.ajog.2023.12.022.

17. Mensah AA, Stowe J, Brown K, LopezBernal J, Ladhani S, Andrews N, et al. COVID-19 reinfection in pregnancy: Assessment of severity and pregnancy outcomes in England. The Journal of infection. 2024;90(2):106392. DOI: 10.1016/j.jinf.2024.106392.

18. Metz TD, Reeder HT, Clifton RG, Flaherman V, Aragon LV, Baucom LC, et al. Post-Acute Sequelae of Severe Acute Respiratory Syndrome Coronavirus 2 (SARS-CoV-2) after Infection during Pregnancy. Obstet Gynecol. 2024;144(3):411-20. DOI: 10.1097/AOG.0000000000005670.

19. Omer SB, Zaman K, Roy E, Arifeen SE, Raqib R, Noory L, et al. Combined effects of antenatal receipt of influenza vaccine by mothers and pneumococcal conjugate vaccine receipt by infants: results from a randomized, blinded, controlled trial. J Infect Dis. 2013;207(7):1144-7. DOI: 10.1093/infdis/jit003.

20. Örtqvist AK, Magnus MC, Aabakke AJM, Urhoj SK, Vinkel Hansen A, Nybo Andersen AM, et al. Severe COVID-19 during pregnancy in Sweden, Norway, and Denmark. Acta Obstet Gynecol Scand. 2023;102(6):681-9. DOI: 10.1111/aogs.14552.

21. Post AL, Li SH, Berry M, Itell H, Martinez DR, Xie G, et al. Efficiency of placental transfer of vaccine-elicited antibodies relative to prenatal Tdap vaccination status. Vaccine. 2020;38(31):4869-76. DOI: 10.1016/j.vaccine.2020.05.036.

22. Richardson K, Weinberg A. Reduced immunogenicity of influenza vaccines in HIV-infected compared with uninfected pregnant women is associated with regulatory T cells. AIDS. 2011;25(5):595-602. DOI: 10.1097/QAD.0b013e32834411a8.

23. Saffar MJ, Khalilian AR, Ajami A, Saffar H, Qaheri A. Seroimmunity to diphtheria and tetanus among mother-infant pairs; the role of maternal immunity in infant immune response to diphtheria-tetanus vaccination. Swiss Med Wkly. 2008;138(17-18):256-60.

24. Salehi M, Ghaemi M, Asadi F, Saedi N, Haddadi M, Eshraghi N, et al. Maternal and Neonatal Outcomes of Pregnant Women With Seasonal Influenza, A Single-Center Study. Journal of Family & Reproductive Health. 2025;19(1):8-13. DOI: https://dx.doi.org/10.18502/jfrh.v19i1.18434.

25. Seif KE, Tadbiri H, Mangione M, Wolfe A, Whitaker K, Desai A, et al. The impact of trimester of COVID-19 infection on pregnancy outcomes after recovery. J Perinat Med. 2023. DOI: 10.1515/jpm-2022-0568.

26. Sohn Y, Choi HK, Yun J, Kim EH, Kim YK. Clinical Characteristics and Risk of Hypoxemia Development in Women Infected with SARS-CoV-2 during Pregnancy. Yonsei Med J. 2024;65(1):27-33. DOI: 10.3349/ymj.2023.0270.

27. Stock SJ, Carruthers J, Denny C, Donaghy J, Goulding A, Hopcroft LEM, et al. Cohort Profile: The COVID-19 in Pregnancy in Scotland (COPS) dynamic cohort of pregnant women to assess effects of viral and vaccine exposures on pregnancy. Int J Epidemiol. 2022;51(5):e245-e55. DOI: 10.1093/ije/dyab243.

28. Sukumaran L, McCarthy NL, Kharbanda EO, Weintraub ES, Vazquez-Benitez G, McNeil MM, et al. Safety of Tetanus Toxoid, Reduced Diphtheria Toxoid, and Acellular Pertussis and Influenza Vaccinations in Pregnancy. Obstet Gynecol. 2015;126(5):1069-74. DOI: 10.1097/AOG.0000000000001066.

29. Sun J, Zhang Y, Zhou S, Song Y, Zhang S, Zhu J, et al. Laboratory-Confirmed Influenza Hospitalizations During Pregnancy or the Early Postpartum Period - Suzhou City, Jiangsu Province, China, 2018-2023. MMWR - Morbidity & Mortality Weekly Report. 2024;73(43):958-64. DOI: https://dx.doi.org/10.15585/mmwr.mm7343a1.

30. Viana PO, Ono E, Dinelli MIS, Costa-Carvalho BT, Santos AMND, Sass N, et al. Maternally acquired IgG immunity in neonates born to renal transplanted women. Vaccine. 2015;33(27):3104-9. DOI: 10.1016/j.vaccine.2015.04.104.

31. Vila-Candel R, Martin-Arribas A, Castro-Sánchez E, Escuriet R, Martin-Moreno JM. Perinatal Outcomes at Birth in Women Infected and Non-Infected with SARS-CoV-2: A Retrospective Study. Healthcare (Basel, Switzerland). 2023;11(21). DOI: 10.3390/healthcare11212833.

32. Wanlapakorn N, Maertens K, Thongmee T, Srimuan D, Thatsanathorn T, Van Damme P, et al. Levels of antibodies specific to diphtheria toxoid, tetanus toxoid, and Haemophilus influenzae type b in healthy children born to Tdap-vaccinated mothers. Vaccine. 2020;38(44):6914-21. DOI: 10.1016/j.vaccine.2020.08.058.

33. Yates L, Pierce M, Stephens S, Mill AC, Spark P, Kurinczuk JJ, et al. Influenza A/H1N1v in pregnancy: an investigation of the characteristics and management of affected women and the relationship to pregnancy outcomes for mother and infant. Health Technology Assessment (Winchester, England). 2010;14(34):109-82. DOI: 10.3310/hta14340-02.

34. Zhang D, Liu S, Peng B, Shi X, Weng T, Fang D, et al. Effects of the timing of maternal SARS-CoV-2 infection and vaccination status on placental transfer of antibodies to neonates: A cross-sectional study. International journal of infectious diseases : IJID : official publication of the International Society for Infectious Diseases. 2024;146:107098. DOI: 10.1016/j.ijid.2024.107098.

**Ineligible context (n = 2)**

1. Avni Biron I, Maayan Y, Mishael T, Hadar E, Neeman M, Plitman Mayo R, et al. SARS-CoV-2 IgG Antibody Levels in Women with IBD Vaccinated during Pregnancy. Vaccines. 2022;10(11). DOI: 10.3390/vaccines10111833.

2. Heilmann E, Tembo T, Fwoloshi S, Kabamba B, Chilambe F, Kalenga K, et al. Trends in SARS-CoV-2 seroprevalence among pregnant women attending first antenatal care visits in Zambia: a repeated cross-sectional survey, 2021-2022. medRxiv. 2024. DOI: 10.1101/2024.01.02.24300729.

**Ineligible outcomes (n = 25)**

1 Alaoui, K. *et al.* Trends in influenza vaccination and its determinants among pregnant French women between 2015 and 2020: A single-center study. *Hum. Vaccin. Immunother.* **20**, 2132799 (2024). https://doi.org:https://dx.doi.org/10.1080/21645515.2022.2132799

2 Bechor Ariel, T. *et al.* Clinical Outcomes and Laboratory Values of Infants with COVID-19 among Several Maternal Variables: A Retrospective Cohort. *Israel Medical Association Journal: Imaj* **25**, 387-391 (2023).

3 Briga, M., Goult, E., Brett, T. S., Rohani, P. & Domenech de Celles, M. Maternal pertussis immunization and the blunting of routine vaccine effectiveness: a meta-analysis and modeling study. *Nature communications* **15**, 921 (2024). https://doi.org:10.1038/s41467-024-44943-7

4 Condac, C. *et al.* Vitamin D Receptor—Interplay in COVID-19-Negative, -Infected, and -Vaccinated Women during Pregnancy. *Journal of Clinical Medicine* **13** (2024). https://doi.org:10.3390/jcm13206140

5 Dakiniewich, A., Graham, S., Dyda, A. & McHugh, L. Pregnancy loss <28 weeks gestation in maternal influenza and COVID-19 vaccination studies: a review of data sources, 2009–2024. *Public Health* **243**, 105733 (2025). https://doi.org:10.1016/j.puhe.2025.105733

6 Dawood, F. S. *et al.* Incidence of influenza during pregnancy and association with pregnancy and perinatal outcomes in three middle-income countries: a multisite prospective longitudinal cohort study. *The Lancet Infectious Diseases* **21**, 97-106 (2021). https://doi.org:10.1016/S1473-3099(20)30592-2

7 de la Cruz Conty, M. L. *et al.* Impact of Recommended Maternal Vaccination Programs on the Clinical Presentation of SARS-CoV-2 Infection: A Prospective Observational Study. **9**, 08 (2021). https://doi.org:10.3390/vaccines9010031

8 Engjom, H. M. *et al.* Perinatal outcomes after admission with COVID-19 in pregnancy: a UK national cohort study. *Nature communications* **15**, 3234 (2024). https://doi.org:10.1038/s41467-024-47181-z

9 Fuchs, E. L. Self-reported prenatal influenza vaccination and early childhood vaccine series completion. *Prev. Med.* **88**, 8-12 (2016). https://doi.org:10.1016/j.ypmed.2016.03.012

10 Homo, R. L. *et al.* High Uptake of Respiratory Syncitial Virus Prevention for Neonates in a Military Treatment Facility. *J. Pediatr.* **273** (2024). https://doi.org:10.1016/j.jpeds.2024.114144

11 Islam, K. *et al.* Heterologous Effects of Pertussis and Influenza Vaccines During Pregnancy on Maternal and Infant Innate Immune Responses: A Pilot Study. *Pediatr. Infect. Dis. J.* **44**, S70-S74 (2025). https://doi.org:https://dx.doi.org/10.1097/INF.0000000000004676

12 Jacobson, K. B. *et al.* Uptake of Maternal RSV Vaccination and Infant Nirsevimab Among Infants Born October 2023 to March 2024. *JAMA Network Open* **8**, e2453696 (2025). https://doi.org:https://dx.doi.org/10.1001/jamanetworkopen.2024.53696

13 Liang, W. *et al.* Effect of domestic COVID-19 vaccine on the plasma D-dimer levels of early pregnant women in China. *Frontiers in Medicine* **10**, 1219502 (2023). https://doi.org:10.3389/fmed.2023.1219502

14 Maertens, K. *et al.* The Effect of Maternal Pertussis Immunization on Infant Vaccine Responses to a Booster Pertussis-Containing Vaccine in Vietnam. *Clin. Infect. Dis.* **63**, S197-S204 (2016). https://doi.org:10.1093/cid/ciw551

15 Murray, A. F. *et al.* Infant Pneumococcal Carriage During Influenza, RSV, and hMPV Respiratory Illness Within a Maternal Influenza Immunization Trial. *J. Infect. Dis.* **220**, 956-960 (2019). https://doi.org:10.1093/infdis/jiz212

16 Packer, C. H. *et al.* Maternal-fetal cytokine profiles in acute SARS-CoV-2 “breakthrough” infection after COVID-19 vaccination. *Front. Immunol.* **15**, 1506203 (2024). https://doi.org:10.3389/fimmu.2024.1506203

17 Rolfo, A. *et al.* Assessment of Placental Antioxidant Defense Markers in Vaccinated and Unvaccinated COVID-19 Third-Trimester Pregnancies. *Life* **14**, 29 (2024). https://doi.org:https://dx.doi.org/10.3390/life14121571

18 Sezerol, M. A. & Altas, Z. M. Vaccine Uptake and COVID-19 Frequency in Pregnant Syrian Immigrant Women. **11**, 25 (2023). https://doi.org:10.3390/vaccines11020257

19 Shanklin, A., Olson, T., Patel, A. K., Trujillo Rivera, E. A. & Pollack, M. M. Respiratory Syncytial Virus and US Pediatric Intensive Care Utilization. *JAMA Network Open* **7**, e2440997 (2024). https://doi.org:https://dx.doi.org/10.1001/jamanetworkopen.2024.40997

20 Shen, C. J. *et al.* Pilot Study for Immunogenicity of SARS-CoV-2 Vaccine with Seasonal Influenza and Pertussis Vaccines in Pregnant Women. *Vaccines* **11** (2023). https://doi.org:10.3390/vaccines11010119

21 Sukumaran, L. *et al.* Association of Tdap Vaccination With Acute Events and Adverse Birth Outcomes Among Pregnant Women With Prior Tetanus-Containing Immunizations. *JAMA* **314**, 1581-1587 (2015). https://doi.org:10.1001/jama.2015.12790

22 Thibault, M., Deceuninck, G., Quach, C. & Brousseau, N. Antenatal tetanus, diphtheria, and acellular pertussis (Tdap) immunization and risk of serogroup 19 IPD in children: An indirect cohort study. *Hum. Vaccin. Immunother.* **20**, 2305522 (2024). https://doi.org:10.1080/21645515.2024.2305522

23 Thorp, J. A. *et al.* Are COVID-19 Vaccines in Pregnancy as Safe and Effective as the U.S. Government, Medical Organizations, and Pharmaceutical Industry Claim? Part I. *Preprints* (2024). https://doi.org:10.20944/preprints202406.2062.v1

24 Trusinska, D. *et al.* Real-world uptake of nirsevimab, RSV maternal vaccine, and RSV vaccines for older adults: a systematic review and meta-analysis. *EClinicalMedicine* **84**, 103281 (2025). https://doi.org:https://dx.doi.org/10.1016/j.eclinm.2025.103281

25 Vizzotti, C. *et al.* Impact of a maternal immunization program against pertussis in a developing country. *Vaccine* **34**, 6223-6228 (2016). https://doi.org:10.1016/j.vaccine.2016.10.081

**Ineligible study design (n = 103)**

1 Abarzúa C, F., Jourdan H, F. d., Rabagliati B, R. & Cabib A, C. Hospitalization by influenza in the obstetric service at the Pontificia Universidad Católica de Chile Clinical Hospital: during the first year of recommendations of the Vaccines for preventing influenza in pregnants women in Chile. *Rev. chil. obstet. ginecol* **70**, 247-252 (2005).

2 Abu-Raya, B. *et al.* Avidity of pertussis toxin antibodies following vaccination with genetically versus chemically detoxified pertussis toxin-containing vaccines during pregnancy. *Front. Immunol.* **16**, 1569151 (2025). https://doi.org:https://dx.doi.org/10.3389/fimmu.2025.1569151

3 Abu-Raya, B. *et al.* Factors affecting antibody responses to immunizations in infants born to women immunized against pertussis in pregnancy and unimmunized women: Individual-Participant Data Meta-analysis. *Vaccine* **39**, 6545-6552 (2021). https://doi.org:10.1016/j.vaccine.2021.09.022

4 Abzug, M. J. *et al.* Safety and immunogenicity of 2009 pH1N1 vaccination in HIV-infected pregnant women. *Clin. Infect. Dis.* **56**, 1488-1497 (2013). https://doi.org:10.1093/cid/cit057

5 Banga, S. *et al.* Background incidence rates of health outcomes of interest for COVID-19 vaccine safety monitoring in a US population: a claims database analysis. *BMJ open* **14**, e083947 (2024). https://doi.org:10.1136/bmjopen-2024-083947

6 Bao, Z., Gao, W., Yu, X., Chai, L. & Liu, Y. Post-marketing safety monitoring of RSV vaccines: A real-world study based on the Vaccine Adverse Event Reporting System (VAERS). *Hum. Vaccin. Immunother.* **21**, 2550857 (2025). https://doi.org:https://dx.doi.org/10.1080/21645515.2025.2550857

7 Barrese, M., Marzan, M. B. & Hui, L. Association Between COVID-19 Pandemic Phases and the Risk of Maternal Intensive Care Unit Admission: A Retrospective Analysis of 215,363 Victorian Hospital Admissions. *The Australian & New Zealand journal of obstetrics & gynaecology* (2025). https://doi.org:10.1111/ajo.13931

8 Bhanushali, D. *et al.* A Study of Transplacental Transfer of SARS-CoV-2 Antibodies in COVID-19 Vaccinated Women in Mumbai, India. *Cureus* **17**, e87643 (2025). https://doi.org:10.7759/cureus.87643

9 Biechele, G. *et al.* Preserved prenatal lung growth assessed by fetal MRI in the omicron-dominated phase of the SARS-CoV-2 pandemic. *Eur. Radiol.* **35**, 1514-1521 (2024). https://doi.org:10.1007/s00330-024-11031-9

10 Brillo, E., Tosto, V., Giardina, I. & Buonomo, E. Maternal tetanus, diphtheria, and acellular pertussis (Tdap) and influenza immunization: an overview. *Journal of Maternal-Fetal and Neonatal Medicine* **34**, 3415-3444 (2021). https://doi.org:10.1080/14767058.2019.1680633

11 Byrne, L., Campbell, H., Andrews, N., Ribeiro, S. & Amirthalingam, G. Hospitalisation of preterm infants with pertussis in the context of a maternal vaccination programme in England. *Arch. Dis. Child.* **103**, 224-229 (2018). https://doi.org:10.1136/archdischild-2016-311802

12 Chen, W. C. *et al.* COVID-19 Bivalent Booster in Pregnancy: Maternal and Neonatal Antibody Response to Omicron BA.5, BQ.1, BF.7 and XBB.1.5 SARS-CoV-2. *Vaccines* **11** (2023). https://doi.org:10.3390/vaccines11091425

13 Chen, W. C. *et al.* Detection of SARS-CoV-2 Neutralizing Antibodies in Vaccinated Pregnant Women and Neonates by Using a Lateral Flow Immunoassay Coupled with a Spectrum-Based Reader. *Biosensors* **12** (2022). https://doi.org:10.3390/bios12100891

14 Chong-Valbuena, A. *et al.* Impact in children under the age of one of Tdap vaccination programme on pregnant women in Castello. *Enferm. Infecc. Microbiol. Clin.* **38**, 485-488 (2020). https://doi.org:10.1016/j.eimc.2020.01.002

15 Clarke, M. *et al.* Body mass index and vaccine responses following influenza vaccination during pregnancy. *Vaccine* **39**, 4864-4870 (2021). https://doi.org:10.1016/j.vaccine.2021.06.065

16 Covas, D. T. *et al.* Adverse events of COVID-19 vaccines in pregnant and postpartum women in Brazil: A cross-sectional study. *PLoS ONE [Electronic Resource]* **18**, e0280284 (2023). https://doi.org:10.1371/journal.pone.0280284

17 Daniel, O. *et al.* Antibody in Breastmilk Following Pertussis Vaccination in Three-time Windows in Pregnancy. *Pediatr. Infect. Dis. J.* **44**, S66-S69 (2025). https://doi.org:https://dx.doi.org/10.1097/INF.0000000000004696

18 de Lima Santos, C. R., Pussi, K. F., de Sousa, I. B. A., Neitzke-Abreu, H. C. & da Costa Lima, M. S. Maternal transfer of anti-SARS-CoV-2 antibodies through immunization and breastfeeding for 12 months. *Medicina* **57** (2024). https://doi.org:10.11606/issn.2176-7262.rmrp.2024.213538

19 de Vries, L., van Hunsel, F., Cuppers-Maarschalkerweerd, B., van Puijenbroek, E. & van Grootheest, K. Adjuvanted A/H1N1 (2009) influenza vaccination during pregnancy: description of a prospective cohort and spontaneously reported pregnancy-related adverse reactions in the Netherlands. *Birth Defects Research* **100**, 731-738 (2014). https://doi.org:10.1002/bdra.23243

20 Donders, G. G. G. *et al.* ISIDOG Consensus Guidelines on COVID-19 Vaccination for Women before, during and after Pregnancy. *Preprints* (2021). https://doi.org:10.20944/preprints202104.0530.v1

21 Ebell, M. H. Bivalent RSV Vaccine Given to Mothers Reduces Total and Severe RSV Infections in Infants. *Am. Fam. Physician* **108**, 405 (2023).

22 Farahani, M. *et al.* Transplacental Transfer Efficiency of SARS-CoV-2-Specific IgG Antibodies in Iranian Seropositive Mothers: A Monocentric Study in Karaj, Iran. *Arch. Clin. Infect. Dis.* **18** (2023). https://doi.org:10.5812/ARCHCID-139871

23 Fly, J. H., Stultz, J. S. & Eiland, L. S. Maternal RSVpreF Vaccine: A Novel Agent for Respiratory Syncytial Virus Prevention in Infants. *The Annals of pharmacotherapy* **59**, 758-766 (2025). https://doi.org:10.1177/10600280241302775

24 Friedrich, F. *et al.* Impact of maternal dTpa vaccination on the incidence of pertussis in young infants. *PLoS ONE [Electronic Resource]* **15**, e0228022 (2020). https://doi.org:10.1371/journal.pone.0228022

25 Fukushima, W. *et al.* Effectiveness of an influenza A (H1N1) 2009 monovalent vaccine among Japanese pregnant women: a prospective observational study assessing antibody efficacy. *Vaccine* **30**, 7630-7636 (2012). https://doi.org:10.1016/j.vaccine.2012.10.027

26 Garima, Y. *et al.* Long Term Immunogenicity of COVID-19 Vaccinations in Pregnancy - The COVIP Study. *SSRN* (2025). https://doi.org:10.2139/ssrn.5233268

27 Gentile, A. *et al.* Pertussis Vaccination During Pregnancy: Regional Situation and Impact of Implementation on National Immunization Programs in Latin America. *Pediatr. Infect. Dis. J.* **44**, S80-S84 (2025). https://doi.org:https://dx.doi.org/10.1097/INF.0000000000004598

28 Gentile, A. *et al.* Bordetella pertussis (Bp) disease: Before (2003-2011) and after (2013-2016) maternal immunization strategy in a pediatric hospital. *Vaccine* **36**, 1375-1380 (2018). https://doi.org:10.1016/j.vaccine.2018.01.091

29 Gerede, A. *et al.* Safety of COVID-19 Vaccination in Pregnancy: A Systematic Review. *Diagnostics (Basel, Switzerland)* **14** (2024). https://doi.org:10.3390/diagnostics14161775

30 Goruntla, N. *et al.* Adverse events following COVID-19 vaccination among pregnant women attending primary health centers: An active-surveillance study. *Vacunas* **18**, 18 (2023). https://doi.org:10.1016/j.vacun.2023.05.003

31 Gray, K. J. *et al.* COVID-19 vaccine response in pregnant and lactating women: a cohort study. *MedRxiv : the Preprint Server for Health Sciences* **08**, 08 (2021). https://doi.org:10.1101/2021.03.07.21253094

32 Halim, B. *et al.* Evaluation of Blood parameters, Covid-19 Vaccine Adverse effects, Hesitancy, and Acceptance rate in Pregnant Women: A Cross-sectional study. *Neuroquantology* **21**, 78-87 (2023). https://doi.org:10.48047/NQ.2023.21.3.NQ33009

33 Hashemi, S. H. *et al.* Seroprevalence of Bordetella pertussis antibody in pregnant women in Iran. *Journal of Research in Health Sciences* **14**, 128-131 (2014).

34 Havers, F. P. *et al.* COVID-19-Associated Hospitalizations and Maternal Vaccination Among Infants Aged <6 Months - COVID-NET, 12 States, October 2022-April 2024. *MMWR. Morbidity and mortality weekly report* **73**, 830-836 (2024). https://doi.org:10.15585/mmwr.mm7338a1

35 Hayashi, T., Sano, K. & Konishi, I. High transferability of neutralizing antibodies against SARS-CoV-2 to umbilical cord blood in pregnant women with BNT162b2 XBB.1.5 vaccine - a retrospective cohort study. *medRxiv* (2024). https://doi.org:10.1101/2024.03.18.24304517

36 Health Institutes of, T. (2022).

37 Health Institutes of, T. Efficacy, Immunogenicity, and Safety of the Inactivated COVID-19 Vaccine (TURKOVAC) in Healthy Pregnant Women. *ClinicalTrials.gov* (2025).

38 Jackson, L. A. *et al.* Immunogenicity of an inactivated monovalent 2009 H1N1 influenza vaccine in pregnant women. *J. Infect. Dis.* **204**, 854-863 (2011). https://doi.org:10.1093/infdis/jir440

39 Janagaraj, P. D., Gurusamy, P. S. R. & Webby, R. Current antenatal pertussis vaccination guidelines miss preterm infants: An epidemiological study from the Northern Territory. *Aust. N. Z. J. Obstet. Gynaecol.* **59**, 436-443 (2019). https://doi.org:10.1111/ajo.12896

40 Jeewandara, C. *et al.* Antibody responses to Sinopharm/BBIBP-CorV in pregnant mothers in Sri Lanka. *PLOS global public health* **2**, e0000607 (2022). https://doi.org:10.1371/journal.pgph.0000607

41 Juvet, L. K., Robertson, A. H., Laake, I., Mjaaland, S. & Trogstad, L. Safety of Influenza A H1N1pdm09 Vaccines: An Overview of Systematic Reviews. *Front. Immunol.* **12**, 740048 (2021). https://doi.org:10.3389/fimmu.2021.740048

42 Kang, D., Choi, A., Park, S., Choe, S. A. & Shin, J. Y. Safety of COVID-19 Vaccination During Pregnancy and Lactation: A VigiBase Analysis. *J. Korean Med. Sci.* **39**, e3 (2024). https://doi.org:10.3346/jkms.2024.39.e3

43 Kay, A. W. *et al.* Pregnancy Does Not Attenuate the Antibody or Plasmablast Response to Inactivated Influenza Vaccine. *J. Infect. Dis.* **212**, 861-870 (2015). https://doi.org:10.1093/infdis/jiv138

44 Ketabi, K., Soleimanjahi, H., Habibian, A. & Abroun, S. Pregnancy and SARS-CoV-2 infection with a focus on its vertical transmission, breastfeeding, cord blood banking, and vaccination during COVID-19 infection. *J. Immunoassay Immunochem.* **44**, 361-380 (2023). https://doi.org:10.1080/15321819.2023.2259454

45 Khan, T. *et al.* Epidemiology and surveillance of influenza, RSV and SARS-CoV-2 in children admitted with severe acute respiratory infection in West bengal, India from 2022 to 2023. *BMC Infect. Dis.* **25**, 1047 (2025). https://doi.org:https://dx.doi.org/10.1186/s12879-025-11421-4

46 Kolla, P., Vasantha Malini, M., Parnem, M. & Jabeen, S. A. Study of the Effect of Covid 19 Vaccination in Antenatal Women on Maternal and Fetal Outcome in Tertiary Care Teaching Hospital in Andhra Pradesh, India. *International Journal of Current Pharmaceutical Review and Research* **15**, 127-133 (2023).

47 Kuznetsova, A., Ceregido, M. A., Jourquin, A., Campora, L. & Da Silva, F. T. Fourteen years of the Pregnancy Registry on maternal immunisation with a reduced-antigen-content tetanus-diphtheria-acellular pertussis (Tdap) vaccine. *Vaccine* **40**, 904-911 (2022). https://doi.org:10.1016/j.vaccine.2021.12.050

48 L, D. A. *et al.* SARS-CoV-2 circulation in pregnant women from central Argentina: mortality rate, infecting variants and a positive impact of the vaccine. *Revista de la Facultad de Ciencias Medicas (Cordoba, Argentina)* **82**, 287-302 (2025). https://doi.org:10.31053/1853.0605.v82.n2.45927

49 Lacroix, I. *et al.* COVACPREG, a French prospective cohort study of women vaccinated against COVID-19 during pregnancy. *Therapie* **80**, 271-278 (2025). https://doi.org:https://dx.doi.org/10.1016/j.therap.2024.06.003

50 Leon-Morillo, M. D. R. *et al.* [Effect of pertussis vaccine in pregnancy and COVID-19 pandemic in the cases of wooping cough]. *Enferm. Infecc. Microbiol. Clin.* **40**, 499-502 (2022). https://doi.org:10.1016/j.eimc.2021.07.007

51 Lin, X. *et al.* Transplacental transmission of the COVID-19 vaccine messenger RNA: evidence from placental, maternal, and cord blood analyses postvaccination. *Am. J. Obstet. Gynecol.* **230**, e113-e116 (2024). https://doi.org:10.1016/j.ajog.2024.01.022

52 Lindley, M. C. *et al.* Vital Signs: Burden and Prevention of Influenza and Pertussis Among Pregnant Women and Infants - United States. *MMWR - Morbidity & Mortality Weekly Report* **68**, 885-892 (2019). https://doi.org:10.15585/mmwr.mm6840e1

53 Macias Saint-Gerons, D. *et al.* Adverse events associated with the use of recommended vaccines during pregnancy: An overview of systematic reviews. *Vaccine* **39 Suppl 2**, B12-B26 (2021). https://doi.org:10.1016/j.vaccine.2020.07.048

54 Martinez-Quezada, R. *et al.* Influence of Maternal and Neonatal Factors on Transplacental Passive Immunity after Vaccination against COVID-19. *Vaccines* **12**, 31 (2024). https://doi.org:https://dx.doi.org/10.3390/vaccines12080860

55 McMillan, M., Kralik, D., Porritt, K. & Marshall, H. Influenza vaccination during pregnancy: a systematic review of effectiveness and adverse effects. *JBI Library of Systematic Reviewis* **10**, 1-11 (2012). https://doi.org:10.11124/01938924-201210561-00016

56 Mendes-de-Almeida, D. P. *et al.* Intracerebral hemorrhage associated with vaccine-induced thrombotic thrombocytopenia following ChAdOx1 nCOVID-19 vaccine in a pregnant woman. *Haematologica* **106**, 3025-3028 (2021). https://doi.org:10.3324/haematol.2021.279407

57 Mesini, A., Moscatelli, A. & Castagnola, E. Pertussis vaccination in pregnancy: how many pediatric hospitalizations could be prevented? *Minerva Ginecol.* **71**, 245-248 (2019). https://doi.org:10.23736/S0026-4784.19.04378-8

58 Moro, P. *et al.* Surveillance of Adverse Events After Seasonal Influenza Vaccination in Pregnant Women and Their Infants in the Vaccine Adverse Event Reporting System, July 2010-May 2016. *Drug Saf.* **40**, 145-152 (2017). https://doi.org:10.1007/s40264-016-0482-1

59 Moro, P. L. *et al.* Adverse events in pregnant women following administration of trivalent inactivated influenza vaccine and live attenuated influenza vaccine in the Vaccine Adverse Event Reporting System, 1990-2009. *Am. J. Obstet. Gynecol.* **204**, 146.e141-147 (2011). https://doi.org:10.1016/j.ajog.2010.08.050

60 NCT05115617. (2021).

61 Oguti, B. *et al.* The half-life of maternal transplacental antibodies against diphtheria, tetanus, and pertussis in infants: an individual participant data meta-analysis. *Vaccine* **40**, 450-458 (2022). https://doi.org:10.1016/j.vaccine.2021.12.007

62 Ohfuji, S. *et al.* Immunogenicity of a monovalent 2009 influenza A (H1N1) vaccine among pregnant women: lowered antibody response by prior seasonal vaccination. *J. Infect. Dis.* **203**, 1301-1308 (2011). https://doi.org:10.1093/infdis/jir026

63 PACTR202406762571290. (2024).

64 Parisi, A., Nunez, O., Lopez-Perea, N. & Masa-Calles, J. Reduced pertussis disease severity in infants following the introduction of pertussis vaccination of pregnant women in Spain, 2015-2019. *Vaccine* **25**, 25 (2024). https://doi.org:10.1016/j.vaccine.2024.03.028

65 Park, H. J. *et al.* A 6-year Prospective, Observational, Multi-Center Post-Marketing Surveillance of the Safety of Tetanus Toxoid, Reduced Diphtheria Toxoid, and Acellular Pertussis (Tdap) Vaccine in Korea. *J. Korean Med. Sci.* **34**, e105 (2019). https://doi.org:10.3346/jkms.2019.34.e105

66 Patton, M. E. *et al.* Interim Evaluation of Respiratory Syncytial Virus Hospitalization Rates Among Infants and Young Children After Introduction of Respiratory Syncytial Virus Prevention Products - United States, October 2024-February 2025. *MMWR - Morbidity & Mortality Weekly Report* **74**, 273-281 (2025). https://doi.org:https://dx.doi.org/10.15585/mmwr.mm7416a1

67 Perez-Bernal, M. *et al.* Anti-SARS-CoV-2 Omicron BA.5 RBD antibody titers generated by the protein subunit vaccine Abdala in breast milk. *Vacunas* **25**, 331-339 (2024). https://doi.org:10.1016/j.vacun.2024.05.001

68 Pfizer. (2024).

69 Pietrasanta, C. *et al.* Coronavirus Disease 2019 Vaccination During Pregnancy and Breastfeeding: A Review of Evidence and Current Recommendations in Europe, North America, and Australasia. *Frontiers in Pediatrics* **10**, 883953 (2022). https://doi.org:10.3389/fped.2022.883953

70 Pongsatha, S. *et al.* A preliminary study on the effectiveness of maternal to neonatal transfer of antibodies against SARS-CoV-2 in the women vaccinated with heterologous CoronaVac-ChAdOx1. *Hum. Vaccin. Immunother.* **19**, 2196912 (2023). https://doi.org:10.1080/21645515.2023.2196912

71 Ramasauskaite, D. & Grinciute, D. Review of short-term and long-term adverse effects of covid-19 vaccination during pregnancy. *Travel Med. Infect. Dis.* **56**, 102667 (2023). https://doi.org:10.1016/j.tmaid.2023.102667

72 Rathod, A. T., Shivamurthy, G. & Ramu, R. Short-term Outcome in Pregnant Women Vaccinated with COVID-19 Vaccine—Covishield (ChAdOx1 nCoV-19 Coronavirus Vaccine): A Prospective Observational Study. *Int. J. Infertil. Fetal. Med.* **16**, 64-67 (2025). https://doi.org:10.5005/jp-journals-10016-1371

73 Razzaghi, H. *et al.* Receipt of COVID-19 Booster Dose Among Fully Vaccinated Pregnant Individuals Aged 18 to 49 Years by Key Demographics. *JAMA* **327**, 2351-2354 (2022). https://doi.org:10.1001/jama.2022.6834

74 Reeves, E. *et al.* Pregnancy and Infant Outcomes Following SARS-CoV-2 Infection in Pregnancy during Delta Variant Predominance – Surveillance for Emerging Threats to Pregnant People and Infants. *ResearchSquare* (2023). https://doi.org:10.21203/rs.3.rs-3393210/v1

75 Rick, A. M. *et al.* Impact of maternal SARS-CoV-2 booster vaccination on blood and breastmilk antibodies. *PLoS ONE [Electronic Resource]* **18**, e0287103 (2023). https://doi.org:10.1371/journal.pone.0287103

76 Rodriguez-Vergara Perez, I., Moscoso Sanchez, D., Dominguez Fernandez, J. M., Montenegro Jaramillo, S. E. & Amores Alguacil, M. [Trends in the epidemiology of pertussis in Malaga, Spain (2017-2024)]. *Anales del Sistema Sanitario de Navarra* **47**, 05 (2024). https://doi.org:https://dx.doi.org/10.23938/ASSN.1091

77 Rottenstreich, A. *et al.* Efficient Maternofetal Transplacental Transfer of Anti- Severe Acute Respiratory Syndrome Coronavirus 2 (SARS-CoV-2) Spike Antibodies after Antenatal SARS-CoV-2 BNT162b2 Messenger RNA Vaccination. *Clin. Infect. Dis.* **73**, 1909-1912 (2021). https://doi.org:10.1093/cid/ciab266

78 Santana, C. P., Luhm, K. R. & Shimakura, S. E. Impact of Tdap vaccine during pregnancy on the incidence of pertussis in children under one year in Brazil - A time series analysis. *Vaccine* **39**, 976-983 (2021). https://doi.org:10.1016/j.vaccine.2020.12.056

79 SeyedAlinaghi, S. *et al.* Feasibility and Effectiveness of Vaccines for COVID-19: An Umbrella Review. *Archives of academic emergency medicine* **13**, e6 (2025). https://doi.org:10.22037/aaem.v12i1.2357

80 Shriver, M. C. *et al.* DEVELOPMENT AND CONCORDANCE OF BINDING AND NEUTRALIZING ASSAYS TO DETERMINE SARS-COV-2 ANTIBODY ACTIVITY IN HUMAN MILK. *Pathogens & immunity* **10**, 97-121 (2025). https://doi.org:10.20411/pai.v10i2.799

81 Silva Dirzo, M. *et al.* UNRAVELING THE PERTUSSIS OUTBREAK IN MEXICO: INSIGHTS FROM A MULTICENTER 2024-2025 STUDY. *The Pediatric infectious disease journal* (2025). https://doi.org:10.1097/INF.0000000000004986

82 Singh, S. B. *et al.* Burden of stillbirths among women vaccinated with COVID-19 vaccines: A systematic review and meta-analysis. *Travel Med. Infect. Dis.* **55**, 102633 (2023). https://doi.org:10.1016/j.tmaid.2023.102633

83 Sourouni, M. *et al.* Assessment of Neonatal Cord Blood SARS-CoV-2 Antibodies after COVID-19 Vaccination in Pregnancy: A Prospective Cohort Study. *Geburtshilfe Frauenheilkd.* **82**, 510-516 (2022). https://doi.org:10.1055/a-1721-4908

84 Takahashi, K. *et al.* COVID-19 mRNA vaccination status and concerns among pregnant women in Japan: a multicenter questionnaire survey. *BMC Pregnancy Childbirth* **23**, 332 (2023). https://doi.org:10.1186/s12884-023-05669-4

85 Tank, P., Chawla, S., Tank, R., Dhingra, A. & Sangwan, J. SARS CoV-2 Antibodies in Cord Blood of Neonates Delivered to Pregnant Mothers Vaccinated for COVID-19. *Journal of Neonatology* (2024). https://doi.org:10.1177/09732179241234520

86 Tavares, F. *et al.* Pregnancy and safety outcomes in women vaccinated with an AS03-adjuvanted split virion H1N1 (2009) pandemic influenza vaccine during pregnancy: a prospective cohort study. *Vaccine* **29**, 6358-6365 (2011). https://doi.org:10.1016/j.vaccine.2011.04.114

87 Terezia, H., Zuzana, K. & Petr, N. Evaluation of SARS-CoV-2 vaccination in pregnant and breastfeeding women. *IJID regions* (2023). https://doi.org:10.1016/j.ijregi.2023.06.002

88 Terranella, A., Asay, G. R., Messonnier, M. L., Clark, T. A. & Liang, J. L. Pregnancy dose Tdap and postpartum cocooning to prevent infant pertussis: a decision analysis. *Pediatrics* **131**, e1748-1756 (2013). https://doi.org:10.1542/peds.2012-3144

89 Terranella, A., Beeler Asay, G. R., Messonnier, M. L., Clark, T. A. & Liang, J. L. Pregnancy dose Tdap and postpartum cocooning to prevent infant pertussis: A decision analysis. *Obstet. Gynecol. Surv.* **68**, 615-616 (2013). https://doi.org:10.1097/01.ogx.0000435520.04959.8f

90 Tessier, E. *et al.* Impact of Extending the Timing of Maternal Pertussis Vaccination on Hospitalized Infant Pertussis in England, 2014-2018. *Clin. Infect. Dis.* **73**, e2502-e2508 (2021). https://doi.org:10.1093/cid/ciaa836

91 Thanh, N. T. M. *et al.* Safety of and Adverse Reactions to the COVID-19 Vaccine Among Pregnant and Breastfeeding Women. *Medical sciences (Basel, Switzerland)* **13** (2025). https://doi.org:10.3390/medsci13020038

92 Thorp, J. A. *et al.* COVID-19 Vaccines: The Impact on Pregnancy Outcomes and Menstrual Function. *Preprints* (2022). https://doi.org:10.20944/preprints202209.0430

93 Tsurane, K. *et al.* Pertussis, diphtheria, and tetanus antibodies seroprevalence in pregnant women and neonates, as a preliminary data for introduction of preconception or prenatal DTaP vaccination among Japanese society. *Vaccine* **40**, 7122-7129 (2022). https://doi.org:10.1016/j.vaccine.2022.09.092

94 Ugolini, V. *et al.* Safety of SARS-CoV-2 vaccination of pregnant women: Luxembourg's cohort study and literature review. *Therapie* (2025). https://doi.org:10.1016/j.therap.2025.07.001

95 Uriarte, P. S., Rodriguez, S. S. J., Sancristobal, I. G. & Agirre, N. M. Effectiveness of dTpa vaccination during pregnancy in preventing whooping cough in infants under 3 months of age. Bizkaia, Basque Country, Spain. *Heliyon* **5**, e01207 (2019). https://doi.org:10.1016/j.heliyon.2019.e01207

96 Vousden, N. *et al.* Severity of maternal infection and perinatal outcomes during periods of SARS-CoV-2 wildtype, alpha, and delta variant dominance in the UK: prospective cohort study. *BMJ medicine* **1**, e000053 (2022). https://doi.org:10.1136/bmjmed-2021-000053

97 Walker, J. L. *et al.* Assessment of Effectiveness of Seasonal Influenza Vaccination During Pregnancy in Preventing Influenza Infection in Infants in England, 2013-2014 and 2014-2015. *J. Infect. Dis.* **221**, 16-20 (2020). https://doi.org:10.1093/infdis/jiz310

98 Walls, T., Graham, P., Petousis-Harris, H., Hill, L. & Austin, N. Infant outcomes after exposure to Tdap vaccine in pregnancy: an observational study. *BMJ Open* **6**, e009536 (2016). https://doi.org:10.1136/bmjopen-2015-009536

99 Wieringa, J. W. *et al.* Impact of immunomodulating medication on maternal Tdap vaccination-induced antibodies in infants. *J. Crohns Colitis* **19**, 04 (2025). https://doi.org:https://dx.doi.org/10.1093/ecco-jcc/jjaf090

100 Yung, C. F., Andrews, N., Hoschler, K. & Miller, E. Comparing the immunogenicity of AS03-adjuvanted 2009 pandemic H1N1 vaccine with clinical protection in priority risk groups in England. *PLoS ONE [Electronic Resource]* **8**, e56844 (2013). https://doi.org:10.1371/journal.pone.0056844

101 Zargar, M., Najafian, M., Shojaei, K. & Moradkhani, N. An Investigation into the impact of continuing or terminating pregnancy on the maternal, fetal and disease progression outcomes in pregnant women with COVID-19. *New Armenian Medical Journal* **17**, 48-57 (2023). https://doi.org:10.56936/18290825-2023.17.f-48

102 Zilver, S. J. M. *et al.* Vaccination from the early second trimester onwards gives a robust SARS-CoV-2 antibody response throughout pregnancy and provides antibodies for the neonate. *Int. J. Infect. Dis.* **130**, 126-135 (2023). https://doi.org:10.1016/j.ijid.2023.02.022

103 Zuber, M. J. *et al.* Maternal influenza vaccination preferentially boosts hemagglutinin stem-specific antibody resulting in efficient transplacental transfer of stem-specific IgG. *Int. J. Gynaecol. Obstet.* **162**, 163-168 (2023). https://doi.org:10.1002/ijgo.14686

**Ineligible document type (n = 185)**

1. A Prospective, Randomized, Open-label Phase 4 Study of the Immunology and Safety of Maternal RSV Vaccination (ABRYSVO (TM)), Infant Nirsevimab (BEYFORTUS (TM)) Immunization, or Both Products During the First Year of Life. 2024.

2. Abu-Raya B, Edwards KM. Optimizing the Timing of Vaccine Administration During Pregnancy. JAMA. 2019;321(10):935-6. DOI: 10.1001/jama.2019.0703.

3. Almeida JVQ, Silva EG, Silva AM, Alves L, Karasu AFG, Philip CE. Neonatal and Maternal Outcomes of mRNA Compared With Non-mRNA Vaccinations in Pregnant Patients With COVID-19: A Systematic Review and Meta-Analysis. Obstet Gynecol. 2024;143(5):5S-None.

4. ANZCTR. Optimising Protection for Pregnant Women with Influenza Vaccination. https://anzctrorgau/ACTRN12614000374662aspx. 2014.

5. ANZCTR. Protective Vaccine Responses in Infants after Maternal Pertussis Vaccination. https://anzctrorgau/ACTRN12617001253392aspx. 2017; ACTRN12617001253392.

6. ANZCTR. COVID-19 vaccination of vulnerable populations (COVULPOP). https://anzctrorgau/ACTRN12621001492842aspx. 2021.

7. Ashonibare V, Ashonibare V, Ashonibare P, Akhigbe T, Adegbola C, Oladipo A, et al. Evaluation of the impact of SARS-CoV-2 vaccine on semen quality, sex hormones, and pregnancy outcome: a systematic review and meta-analysis. Hum Reprod. 2025;40:i230-i1. DOI: 10.1093/humrep/deaf097.383.

8. Aslam J, Masroor M, Mehmood QU, Arshad M, Jabeen S, Mushtaq MA. Maternal Mortality with SARS-COV-2 during its 4th Wave in Pakistan: The Vaccine Paradox and Pregnancy. Journal of the College of Physicians & Surgeons Pakistan. 2022;32(1):119-21. DOI: 10.29271/jcpsp.2022.01.119.

9. AstraZeneca. A Post-authorisation/Post-marketing Observational Study to Evaluate the Association Between Exposure to AZD1222 and Safety Concerns Using Existing Secondary Health Data Sources. https://clinicaltrialsgov/study/NCT05126992. 2021.

10. Baker M, Freshwater J, Bixler D. Influenza vaccination among West Virginia pregnant and postpartum women 2009-2010. W V Med J. 2012;108(2):54.

11. Beharier O, Plitman Mayo R, Raz T, Nahum Sacks K, Schreiber L, Suissa-Cohen Y, et al. Efficient maternal to neonatal transfer of antibodies against SARS-CoV-2 and BNT162b2 mRNA COVID-19 vaccine. The Journal of clinical investigation. 2021;131(19):e154834. DOI: 10.1172/JCI154834.

12. Beijing Ditan Hospital. Study on the Safety of New Coronavirus Vaccination for Couples During the Peri-pregnancy Period on the Fetus. https://clinicaltrialsgov/study/NCT05125770. 2021.

13. Bio NTech S. E. A phase 2/3, placebo-controlled, randomized, observer-blind study to evaluate the safety, tolerability, and immunogenicity of a SARS-COV-2 RNA vaccine candidate (BNT162b2) against COVID-19 in healthy pregnant women 18 years of age and older. https://clinicaltrialsgov/study/NCT04754594. 2021.

14. An Observational Study to Assess the Safety of Pertagen®, a Recombinant Acellular Pertussis Vaccine in Pregnant Women in Thailand [Internet]. 2025. Available from: https://clinicaltrials.gov/study/NCT06888076.

15. Boelig RC, Aghai ZH, Chaudhury S, Kazan AS, Chan JSY, Bergmann-Leitner E. Impact of COVID-19 disease and COVID-19 vaccination on maternal or fetal inflammatory response, placental pathology, and perinatal outcomes. Am J Obstet Gynecol. 2022;227(4):652-6. DOI: 10.1016/j.ajog.2022.05.049.

16. Bozhbanbaeva N, Urstemova K, Adilbekova IM, Esenova SA, Cetinkaya M. IMPACTS OF MATERNAL COVID-19 VACCINATION ON PRETERM BIRTH RATES. BMJ Paediatr Open. 2024;8:A50-None. DOI: 10.1136/bmjpo-2024-EPAC.109.

17. Brophy J, Baclic O, Tunis MC. Summary of the NACI Update on Immunization in Pregnancy with Tetanus Toxoid, Reduced Diphtheria Toxoid and Reduced Acellular Pertussis (Tdap) Vaccine. Canada communicable disease report = Releve des maladies transmissibles au Canada. 2018;44(3-4):91-4. DOI: 10.14745/ccdr.v44i34a04.

18. Buekens P, Berrueta M, Ciapponi A, Bardach A, Mazzoni A, Rodriguez-Cairoli F, et al. Safe in pregnancy: A global living systematic review and meta-analysis of COVID-19 vaccines in pregnancy. Vaccine. 2024;42(7):1414-6. DOI: 10.1016/j.vaccine.2024.02.012.

19. Concurrent Versus Sequential Administration of Tdap and RSV Vaccines in Pregnancy - A Pilot Feasibility Trial [Internet]. 2025. Available from: https://clinicaltrials.gov/study/NCT07097012.

20. Cassaniti I, Percivalle E, Zelini P, Ngaradoumbe Nanhorngue K, Parolo A, Bernardi V, et al. Both SARS-CoV-2 infection and vaccination in pregnancy elicited neutralizing antibodies in pregnant women and newborns. Clin Microbiol Infect. 2021;27(11):1708-9. DOI: 10.1016/j.cmi.2021.08.004.

21. CCMO. Maternal pertussis (Tdap) vaccination and its effects on the immune response of the newborn up to 12 months of age. https://onderzoekmetmensennl/en/trial/44971. 2017; NL-OMON44971.

22. CCMO. Exploring the impact of acellular pertussis immunisation during pregnancy on the differences in the immune response of infants after primary immunisations with an acellular pertussis containing vaccine: an open label study. https://onderzoekmetmensennl/en/trial/48434. 2019; NL-OMON48434.

23. CCMO. Premature infants and maternal pertussis immunization. Is second trimester vaccination beneficial? https://onderzoekmetmensennl/en/trial/49737. 2020.

24. Central Hospital Nancy France. Diphtheria, Tetanus, Poliomyelitis -Pertussis-Hib Immunisation in Preterm-born Neonates. https://clinicaltrialsgov/study/NCT02179996.

25. ChiCtr. A primary safety study of the offspring from the unplanned pregnancy during maternal exposure of novel coronavirus pneumonia (COVID-19) vaccines. http://wwwchictrorgcn/showprojaspx?proj=129453. 2021.

26. ChiCtr. Effect of COVID-19 vaccine on pregnancy outcomes. http://wwwchictrorgcn/showprojaspx?proj=132315. 2021.

27. ChiCtr. Effects of new crown vaccine injection on pregnancy outcomes of frozen embryo transfer. http://wwwchictrorgcn/showprojaspx?proj=146795. 2022.

28. ChiCtr. Maternal-fetal safety and disease prevention of COVID-19 inactivated vaccines in pregnant populations. https://wwwchictrorgcn/showprojhtml?proj=193035. 2023.

29. Copenhagen Studies on Asthma in Childhood. H1N1v Vaccination of Pregnant Women: A Longitudinal Cohort Study Characterizing Influenza A H1N1v Vaccination in Pregnant Women.

30. Copland E, Hirst JA, Ranger T, Mei WX, Dixon S, Coupland C, et al. Analysis of uptake, effectiveness and safety of COVID-19 vaccinations in pregnancy using the QResearch database: research protocol and statistical analysis plan. medRxiv. 2022. DOI: 10.1101/2022.12.19.22283660.

31. CorEvitas RSV Vaccine Pregnancy Registry (RSV-PR) [Internet]. 2024. Available from: https://clinicaltrials.gov/study/NCT06521944.

32. Corporation A. The Safety and Immune Response to Influenza Vaccination in Pregnant Women.

33. Ctri. A Study to Determine the Safety and Effectiveness of the RSV F Vaccine to Protect Infants Via Maternal vaccination. https://trialsearchwhoint/Trial2aspx?TrialID=CTRI/2017/09/009821. 2017.

34. Ctri. A Phase III study to assess safety and efficacy of an RSV Maternal vaccine, in pregnant women and infants born to vaccinated mothers. https://trialsearchwhoint/Trial2aspx?TrialID=CTRI/2021/04/033025. 2021.

35. Ctri. A study on the safety and immune response to an unadjuvanted RSV Maternal vaccine, in high risk pregnant women aged 15 to 49 years and infants born to the vaccinated mothers. https://trialsearchwhoint/Trial2aspx?TrialID=CTRI/2021/10/037383. 2021.

36. Ctri. Mother and babys SARS-COV-2 antibody levels following COVID vaccination during pregnancy. https://wwwctrinicin/Clinicaltrials/pmaindet2php?EncHid=Njc3MTI=&Enc=&userName=CTRI/2022/03/041520. 2022; CTRI/2022/03/041520.

37. Ctri. A study on the effect of COVID vaccination on the outcome of pregnancy comparing pregnant women with severe covid disease and mild covid disease. https://wwwctrinicin/Clinicaltrials/pmaindet2php?EncHid=NzYwMDE=&Enc=&userName=CTRI/2022/10/046842. 2022.

38. Ctri. To see the effect of influenza vaccination in pregnant women and their newborn against influenza illness. https://trialsearchwhoint/Trial2aspx?TrialID=CTRI/2024/12/078484. 2024.

39. de Bruin O, Phijffer E, Ahmadizar F, Van der Maas NAT, Wildenbeest JG, Sturkenboom M, et al. Efficacy and safety of SARS‐CoV‐2 vaccination in pregnancy to prevent COVID‐19 in mothers and early infancy. Cochrane Database Syst Rev. 2025(2). DOI: 10.1002/14651858.CD015785.

40. DeSilva M, Haapala J, Vazquez-Benitez G, Vesco KK, Daley MF, Getahun D, et al. Evaluation of Acute Adverse Events after Covid-19 Vaccination during Pregnancy. The New England journal of medicine. 2022;387(2):187-9. DOI: 10.1056/NEJMc2205276.

41. DeSilva M, Vazquez-Benitez G, Nordin JD, Lipkind HS, Romitti PA, DeStefano F, et al. Tdap vaccination during pregnancy and microcephaly and other structural birth defects in offspring. JAMA - Journal of the American Medical Association. 2016;316(17):1823-5. DOI: 10.1001/jama.2016.14432.

42. DeSilva MB, Haapala J, Vazquez-Benitez G, Boyce TG, Fuller CC, Daley MF, et al. Medically Attended Acute Adverse Events in Pregnant People After Coronavirus Disease 2019 (COVID-19) Booster Vaccination. Obstet Gynecol. 2023;142(1):125-9. DOI: 10.1097/AOG.0000000000005241.

43. Drks. Safety of SARS-CoV-2 vaccination during pregnancy – Collection and analysis of pregnancy course data by the Pharmakovigilanz- und Beratungszentrum für Embryonaltoxikologie. https://drksde/search/en/trial/DRKS00025255. 2021.

44. DRKS00025255. Safety of SARS-CoV-2 vaccination during pregnancy (Covid-19)– Collection and analysis of pregnancy course data by the Pharmakovigilanz- und Beratungszentrum für Embryonaltoxikologie. 2021.

45. Duggal R, Craig A, Unnithan S, Truong T, Weaver K, Swamy G, et al. Maternal COVID-19 vaccination and 6-month infant developmental outcomes. Am J Obstet Gynecol. 2023;228(2):S777-S8. DOI: 10.1016/j.ajog.2022.11.124.

46. Safety of Simultaneous Versus Sequential Administration of mRNA COVID-19 Vaccine and Inactivated Influenza Vaccine (IIV) in Pregnant Women [Internet]. 2024. Available from: https://clinicaltrials.gov/study/NCT06503900.

47. Duke University. A Prospective Observational Study to Evaluate the Safety of COVID-19 Vaccination in Pregnant Women. https://clinicaltrialsgov/study/NCT04826640. 2021.

48. The Optimal Timing of Vaccination in Pregnancy: a Multi-dimensional Mechanistic Approach to Measure Immune Responses in Pregnant Women [Internet]. 2022. Available from: https://clinicaltrials.gov/study/NCT06466629.

49. Ellington S, Jatlaoui TC. COVID-19 vaccination is effective at preventing severe illness and complications during pregnancy. The Lancet. 2023;401(10375):412-3. DOI: 10.1016/S0140-6736(22)02613-7.

50. Engjom HM, Skar F, Meijerink H, Bakken IJL, Halvorsen GS, Dvergsdal ET, et al. Pertussis vaccine - pregnant women are the target group in the childhood vaccination programme. Tidsskr Nor Laegeforen. 2024;144(7):04. DOI: https://dx.doi.org/10.4045/tidsskr.24.0208.

51. Euctr B. Vaccination against whooping cough in pregnancy. https://wwwclinicaltrialsregistereu/ctr-search/search?query=eudract_number:2011-001936-45. 2011.

52. Euctr B. TDaP (Tetanus, Diphtheria, acellular Pertussis) immunization during pregnancy results in an augmentation of maternal antibodies, which are in turn transferred from the mother to fetus and offer additional protection to the newborn infant during the first months of life. The role of these high maternal antibodies levels on the infant’s immune responses after vaccination will be assessed in term and preterm infants (the MAMA study). https://wwwclinicaltrialsregistereu/ctr-search/search?query=eudract_number:2020-003466-39. 2021.

53. Euctr B. The optimal timing of vaccination in pregnancy. https://wwwclinicaltrialsregistereu/ctr-search/search?query=eudract_number:2021-005194-77. 2021.

54. Euctr B. Immunization during pregnancy is an efficient and safe approach to provide protection against infectious pathogens affecting the young infant. The objective is to identify the determinants of antibody-mediated immunity in infants born to mothers immunized during pregnancy. A systems biology approaches will be used to delineate pre-vaccination and post-vaccination cellular and molecular correlates of the immune response to pertussis immunization in peripheral blood and in breastmilk. https://wwwclinicaltrialsregistereu/ctr-search/search?query=eudract_number:2022-002697-80. 2022.

55. Euctr C. Immunogenicity and safety study of Boostrix in pregnant women. https://trialsearchwhoint/Trial2aspx?TrialID=EUCTR2014-001119-38-CZ. 2015.

56. Euctr E. A Study to Evaluate the Efficacy of Maternal Immunization with RSV F Vaccine in Preventing RSV Lower Respiratory Tract Infection in Young Infants. https://wwwclinicaltrialsregistereu/ctr-search/search?query=eudract_number:2016-002302-39. 2016.

57. Euctr E. A study to evaluate the safety, reactogenicity nad immunogenicity of the GSK investigational vaccine GSK3003891A in healthy pregnant women and infants born to vaccinated mothers. https://trialsearchwhoint/Trial2aspx?TrialID=EUCTR2016-002733-30-ES. 2017.

58. Euctr E. Study of safety, reactogenicity and immunogenicity of GlaxoSmithKlineâ€™s (GSK)Respiratory Syncytial Virus (RSV)maternal unadjuvanted vaccine in healthy pregnant women (aged 18 to 40 years) and their infants. https://trialsearchwhoint/Trial2aspx?TrialID=EUCTR2019-001991-12-ES. 2019.

59. Euctr E. A Phase 2/3 Study to Evaluate the Safety, Tolerability, and Immunogenicity of SARS CoV-2 RNA Vaccine Candidate (BNT162b2) Against COVID-19 in Healthy Pregnant Women 18 Years of Age and Older. https://trialsearchwhoint/Trial2aspx?TrialID=EUCTR2020-005444-35-ES. 2022.

60. Euctr F. Immunogenicity and Safety of Quadrivalent Influenza Vaccine (VaxigripTetra™) in Pregnant Women. https://wwwclinicaltrialsregistereu/ctr-search/search?query=eudract_number:2016-004763-40. 2017.

61. Euctr F. Maternal pertussis Immunization in FInland Study - MIFI Study. https://wwwclinicaltrialsregistereu/ctr-search/search?query=eudract_number:2019-001986-34. 2019.

62. Euctr F. Study of safety, reactogenicity and immunogenicity of GlaxoSmithKline’s (GSK)Respiratory Syncytial Virus (RSV)maternal unadjuvanted vaccine in healthy pregnant women (aged 18 to 40 years) and their infants. https://wwwclinicaltrialsregistereu/ctr-search/search?query=eudract_number:2019-001991-12. 2019.

63. Euctr F. A Phase III double-blind study to assess safety and efficacy of an RSV Maternal unadjuvanted vaccine, in pregnant women and infants born to vaccinated mothers. https://trialsearchwhoint/Trial2aspx?TrialID=EUCTR2020-001355-40-FI. 2020.

64. Euctr G. Whooping cough vaccination in pregnancy - assessment of immune responses in mothers and subsequent responses to infant vaccinations in their babies. https://trialsearchwhoint/Trial2aspx?TrialID=EUCTR2013-004495-34-GB. 2014.

65. Fell DB, Dodds L, McNeil S, MacDonald NE. H1N1 influenza vaccination during pregnancy. BMJ (Online). 2014;348. DOI: 10.1136/bmj.g3500.

66. Forward L, McClymont E, Blitz S, Alton G, Boucoiran I, Castillo E, et al. Impact of COVID-19 in Pregnancy: The Role of Variant and Vaccination. J Obstet Gynaecol Can. 2025;47(6). DOI: 10.1016/j.jogc.2025.102863.

67. PIPELINE-RSV International Trial. Pregnancy and Infant PrEparedness pLatform IN Europe (PIPELINE)- RSV International Immunisation Adaptive Platform Trial [Internet]. 2025. Available from: https://clinicaltrials.gov/study/NCT07041190.

68. Ghafari Z, Khameneh A, Vahedi L. COVID19 Vaccination Considerations for Pregnant Women: A Systematic Review. Iran J Nurs Midwifery Res. 2024;29(4):389-96. DOI: 10.4103/ijnmr.ijnmr_146_22.

69. GlaxoSmithKline. A Study of Safety, Reactogenicity and Immune Response of the Repeat Vaccination Against RSV When Given to Female Participants of 18-49 Years of Age During Their Subsequent Uncomplicated Pregnancy. https://clinicaltrialsgov/study/NCT05229068.

70. GlaxoSmithKline. Effectiveness of Maternal Immunization With Boostrix at Preventing Pertussis Among Infants <2 Months Old in the United States. https://clinicaltrialsgov/study/NCT03973905.

71. GlaxoSmithKline. The Safety of Boostrix Following Routine Immunization of Pregnant Women. https://clinicaltrialsgov/study/NCT03463577.

72. Gloeckner S, Hornung F, Heimann Y, Schleussner E, Deinhardt-Emmer S, Loeffler B, et al. Newborns' passive humoral SARS-CoV-2 immunity following heterologous vaccination of the mother during pregnancy. Am J Obstet Gynecol. 2022;226(2):261-2. DOI: 10.1016/j.ajog.2021.10.006.

73. Golan N, Ashkenazi S, Davidovich R, Levinsky A, Bar Chaim A, Abu Hamad R, et al. Quantitative Analysis of Vertical Transmission of Maternal SARS-CoV-2 Antibodies to Neonates and Young Infants Following Immunization During Pregnancy. Journal of the Pediatric Infectious Diseases Society. 2022;11(11):506-9. DOI: 10.1093/jpids/piac065.

74. Health Council of the N, Gezondheidsraad. [Vaccination of pregnant women against seasonal influenza 2010-2011]. Netherlands: Health Council of the Netherlands Gezondheidsraad (GR); 2010. Available from: http://www.gezondheidsraad.nl/nl/adviezen/vaccinatie-van-zwangere-vrouwen-tegen-seizoensgriep-2010-2011.

75. Heininger U, Riffelmann M, Bar G, Rudin C, von Konig CH. The protective role of maternally derived antibodies against Bordetella pertussis in young infants. Pediatr Infect Dis J. 2013;32(6):695-8. DOI: 10.1097/INF.0b013e318288b610.

76. Hospices Civils de Lyon. Pregnant Women Vaccinated Against Covid-19. https://clinicaltrialsgov/study/NCT04957953.

77. Hospices Civils de Lyon. Prospective Cohort of Pregnant Women Vaccinated Against Covid-19. https://clinicaltrialsgov/study/NCT04957953. 2021.

78. Huang J, Xia L, Zhao Y, Wu X, Chen J, Li M, et al. Coronavirus disease 2019 vaccination and live birth outcome after fresh embryo transfer. J Infect. 2022;85(6):702-69. DOI: 10.1016/j.jinf.2022.09.023.

79. Jacobson KB, Fireman B, Klein N, Kakuru A, Nankabirwa J, Kamya M, et al. MATERNAL SARS-COV-2 INFECTION, VACCINATION, AND INFANT STUNTING IN UGANDA. Am J Trop Med Hyg. 2025;112(6):476-None.

80. Jprn jRCT. A Trial to Evaluate the Efficacy and Safety of RSVpreF in Infants Born to Women Vaccinated During Pregnancy. https://jrctniphgojp/latest-detail/jRCT2031200167. 2020; JPRN-jRCT2031200167.

81. Kehribar TE, Urbschat C, Schepanski S, Tallarek AC, Stahl F, Fonseca Brito LC, et al. Alleviated humoral and cellular immune response in pregnant women upon vaccination against SARS-CoV-2 infection. Geburtshilfe Frauenheilkd. 2022;82(10):e103-None. DOI: 10.1055/s-0042-1756894.

82. Kharbanda EO, Haapala J, DeSilva M, Vazquez-Benitez G, Vesco KK, Naleway AL, et al. Spontaneous Abortion Following COVID-19 Vaccination During Pregnancy. JAMA. 2021;326(16):1629-31. DOI: 10.1001/jama.2021.15494.

83. Kharbanda EO, Vazquez-Benitez G, Shi WX, Lipkind H, Naleway A, Molitor B, et al. Assessing the safety of influenza immunization during pregnancy: the Vaccine Safety Datalink. Am J Obstet Gynecol. 2012;207(3 Suppl):S47-51. DOI: 10.1016/j.ajog.2012.06.073.

84. Kugelman N, Nahshon C, Shaked-Mishan P, Lavie O, Stein N, Kedar R, et al. SARS-CoV-2 immunoglobulin G antibody levels in infants following messenger RNA COVID-19 vaccination during pregnancy. Am J Obstet Gynecol. 2022;227(6):911-3. DOI: 10.1016/j.ajog.2022.07.016.

85. LaCourse SM, Wetzler EA, Aurelio MC, Escudero JN, Selke SS, Greninger AL, et al. Hybrid Immunity to Severe Acute Respiratory Syndrome Coronavirus 2 During Pregnancy Provides More Durable Infant Antibody Responses Compared to Natural Infection or Vaccination Alone. J Infect Dis. 2024;229(4):1241-3. DOI: 10.1093/infdis/jiae046.

86. Lacroix I, Damase-Michel C, Kreft-Jais C, Castot A, Montastruc JL. 2009 H1N1 influenza vaccines in pregnant women: the French Pharmacovigilance survey. Vaccine. 2011;29(7):1357-8. DOI: 10.1016/j.vaccine.2010.12.011.

87. Levi M, Ravaldi C, Pontello V, Bonaiuti R, Vannacci A, Suissa S. Influenza Vaccination and Stillbirth Prevention in High-Income Countries: Is It Really That Effective? Clin Infect Dis. 2017;64(8):1142-3. DOI: 10.1093/cid/cix107.

88. Li D, Zhang J, Zhang X, Chang Y, Vermund SH. Maternal and Newborn Outcomes of SARS-CoV-2/COVID-19 and Pregnancy: Parallels and Contrasts with Human Immunodeficiency Virus/Acquired Immunodeficiency Syndrome. Medical Research Archives. 2024;12(4). DOI: https://dx.doi.org/10.18103/mra.v12i4.5205.

89. Ma H, Mao R, Wang R, Liang Y, Jin Y, Chen H, et al. Effects of inactivated COVID-19 vaccinations on the IVF/ICSI-ET live birth rate and pregnancy complication in a population of southern China: A retrospective cohort study. J Evid Based Med. 2023;16(2):107-10. DOI: 10.1111/jebm.12528.

90. Magnus MC, Gjessing HK, Eide HN, Wilcox AJ, Fell DB, Haberg SE. Covid-19 Vaccination during Pregnancy and First-Trimester Miscarriage. N Engl J Med. 2021;385(21):2008-10. DOI: 10.1056/NEJMc2114466.

91. Magnus MC, Rasmussen TD, Örtqvist AK, Oakley LL, Urhoj SK, Stephansson O, et al. COVID-19 vaccination during pregnancy is not associated with an increased risk of severe postpartum hemorrhage. Am J Obstet Gynecol. 2024;231(3):e99-e100. DOI: 10.1016/j.ajog.2024.04.028.

92. Marshall CL, Kaplowitz E, Ibroci E, Chung K, Gigase FAJ, Lieber M, et al. Severe Acute Respiratory Syndrome Coronavirus 2 (SARS-CoV-2) Antibody Titer Levels in Pregnant Individuals After Infection, Vaccination, or Both. Obstet Gynecol. 2023;141(6):1199-202. DOI: 10.1097/AOG.0000000000005172.

93. Meyer R, Mohr-Sasson A, Mashiach R, Levin G. BNT162b2 COVID-19 vaccine and gynecologic emergency department visit diagnoses—A study from a large tertiary center. International Journal of Gynecology and Obstetrics. 2023;161(1):323-5. DOI: 10.1002/ijgo.14584.

94. Mitchell MD, Greysen SR, Lane-Fall M, McKenzie JG, O'Donnell JA, Siddique SM, et al. COVID-19: vaccination for women who are pregnant or lactating. United States: Penn Medicine Center for Evidence-based Practice (CEP); 2021. Available from: https://www.med.upenn.edu/CEP/evidence-report-libraries.html.

95. Mitchell MD, Greysen SR, Lane-Fall M, Siddique SM, Talati NJ. COVID-19: effects of vaccines on fertility and pregnancy outcomes. United States: Penn Medicine Center for Evidence-based Practice (CEP); 2021. Available from: https://www.med.upenn.edu/CEP/evidence-report-libraries.html.

96. Mithal LB, Otero S, Shanes ED, Goldstein JA, Miller ES. Cord blood antibodies following maternal coronavirus disease 2019 vaccination during pregnancy. Am J Obstet Gynecol. 2021;225(2):192-4. DOI: 10.1016/j.ajog.2021.03.035.

97. An Observational Study to Assess Maternal and Infant Outcomes Following Exposure to SPIKEVAX During Pregnancy [Internet]. 2024. Available from: https://clinicaltrials.gov/study/NCT06369272.

98. Morgan JA, Biggio JR, Jr., Martin JK, Mussarat N, Chawla HK, Puri P, et al. Maternal Outcomes After Severe Acute Respiratory Syndrome Coronavirus 2 (SARS-CoV-2) Infection in Vaccinated Compared With Unvaccinated Pregnant Patients. Obstet Gynecol. 2022;139(1):107-9. DOI: 10.1097/AOG.0000000000004621.

99. Muhammad Pradhika M, Jens M, Muhammad Pradhiki M, Howard C. Post-Vaccination Clinical Safety and Immunogenicity of Maternal Purified Respiratory Syncytial Virus (RSV) of Protein Vaccine Administration in Pregnant Women: Meta-Analysis of Randomised Trials. SSRN. 2023. DOI: 10.2139/ssrn.4586103.

100. National Institute for Communicable Diseases South Africa. Effectiveness of Trivalent Inactivated Influenza Maternal Vaccination Among Pregnant Women and Their Newborns in South Africa. https://clinicaltrialsgov/study/NCT02465190.

101. National Research Council of Thailand Y. Safety and Immunological Responses after COVID-19 vaccination in Thai Pregnant Women. TCTR20210717002. 2021.

102. National Vaccine Institute. Persistence of anti-SARS-CoV2 antibodies in infants born during 2021-2023 to the mothers who had received COVID-19 vaccination during pregnancy. TCTR20230324006.

103. Nct. Influenza Vaccine in Pregnancy Part 2. https://clinicaltrialsgov/show/NCT00593970. 2008.

104. Nct. Novartis Pandemic Influenza A (H1N1) Vaccine(s) Observational Comparative Safety Study. http://clinicaltrialsgov/show/NCT01037829. 2009.

105. Nct. Evaluation of Pandemic Influenza A (H1N1) Vaccine in Chronic and or Immunocompromised Patients, Elderly and Pregnants. http://clinicaltrialsgov/show/NCT01218685. 2010.

106. Nct. Immunogenicity and Safety of Different Dosing Schedules of Trivalent Influenza Vaccine in HIV-infected Pregnant Women. https://clinicaltrialsgov/show/NCT01527825. 2011.

107. Nct. A Pharmacovigilance Study for AdimFlu-S (A/H1N1) Influenza Vaccine in Pregnant Women <Scientific_title/> <Acronym/>. http://clinicaltrialsgov/show/NCT01354730. 2011.

108. Nct. Maternal Immunization: Giving Immunity For Tomorrow. https://clinicaltrialsgov/show/NCT01496079. 2011.

109. Nct. Protecting Pregnant Women From Infectious Diseases. https://clinicaltrialsgov/show/NCT01761799. 2012.

110. Nct. Safety and Immunogenicity Study of Influenza Vaccines in HIV-infected and HIV-uninfected Pregnant Women in Western Kenya. https://clinicaltrialsgov/show/NCT01810731. 2013.

111. Nct. Sanofi Pasteur Quadrivalent Influenza Vaccine (QIV) Pregnancy Registry. https://clinicaltrialsgov/show/NCT01945424. 2013.

112. Nct. TDAP Safety in Pregnant Women. https://clinicaltrialsgov/show/NCT02209623. 2014.

113. Nct. A Study to Determine the Safety and Efficacy of the RSV F Vaccine to Protect Infants Via Maternal Immunization. https://clinicaltrialsgov/show/NCT02624947. 2015.

114. Nct. Sanofi Pasteur Quadrivalent Intradermal Influenza Vaccine Pregnancy Registry. https://clinicaltrialsgov/show/NCT02554409. 2015.

115. Nct. Safety and Immunogenicity of Simultaneous Tdap and IIV in Pregnant Women. https://clinicaltrialsgov/show/NCT02783170. 2016.

116. Nct. Respiratory Syncytial Virus (RSV) and Vaccination in Pregnancy. https://clinicaltrialsgov/show/NCT03096574. 2017.

117. Nct. NK Cell Mediated Influenza Immunity During Pregnancy. https://clinicaltrialsgov/ct2/show/NCT03196245. 2017.

118. Nct. Vaccination In Pregnancy Gene Signature: VIP Signature Study. https://clinicaltrialsgov/show/NCT03284515. 2017.

119. Nct. Optimising Protection for Pregnant Women and Infants With Maternal Vaccination. https://clinicaltrialsgov/ct2/show/NCT03457194. 2017.

120. Nct. Seroprevalence of Bordetella Pertussis Antibodies and Anti-pertussis Antibody Response After a Single Dose of Tdap in Pregnant Thai Women. https://clinicaltrialsgov/show/NCT03498300. 2018.

121. Nct. Pertussis Immunization During Pregnancy &amp; HIV Infection. https://clinicaltrialsgov/show/NCT03519373. 2018.

122. Nct. A phase 2b placebo-controlled, randomized study of a respiratory syncytial virus (rsv) vaccine in pregnant women. https://clinicaltrialsgov/show/NCT04032093. 2019.

123. Nct. Safety of RIV4 Versus IIV4 in Pregnant Women. https://clinicaltrialsgov/show/NCT03969641. 2019.

124. Nct. Comparing the Incidence of Preeclampsia Between Pregnant Women Receiving Tdap Vaccinations at Week 28 or at Week 36. https://clinicaltrialsgov/show/NCT04424693. 2020.

125. Nct. Surveillance Study to Assess the Safety of Flublok Quadrivalent (Influenza Vaccine) in Pregnant Women and Their Offspring. https://clinicaltrialsgov/show/NCT04460781. 2020.

126. Nct. Maternal and Fetal Outcomes Following Influenza Vaccination in Pregnancy. https://clinicaltrialsgov/show/NCT04579822. 2020.

127. Nct. Immunogenicity Study of the Covid-19 (Recombinante) Vaccine With a 4 or 8 Week Interval Between the First Doses. https://clinicaltrialsgov/show/NCT05157178. 2021.

128. Nct. To Evaluate the Safety, Tolerability, and Immunogenicity of BNT162b2 Against COVID-19 in Healthy Pregnant Women 18 Years of Age and Older. https://clinicaltrialsgov/ct2/show/NCT04754594. 2021.

129. Nct. Effectiveness of Adacel Vaccination in Pregnancy at Preventing Pertussis in Infants &lt; 2 Months of Age in the United States. https://clinicaltrialsgov/show/NCT05040802. 2021.

130. Nct. Pregnant and Lactating Individuals & Newborns COVID-19 Vaccination Prospective Cohort Study. https://clinicaltrialsgov/ct2/show/NCT05115617. 2021.

131. Nct. Trial of Tolerability, Reactogenicity, Safety and Immunogenicity of Flu-M [Inactivated Split Influenza Vaccine] in Pregnant Women. https://clinicaltrialsgov/show/NCT05457894. 2022.

132. Nct. COVID Booster in Pregnancy and Lactation. https://clinicaltrialsgov/show/NCT05543993. 2022.

133. Nct. Peri-conceptional or Pregnancy Exposure of Vaccination and the Risk of Adverse Pregnancy Outcomes. https://clinicaltrialsgov/ct2/show/NCT06180447. 2023.

134. Nct. Safety of Tetanus, Diphtheria, Acellular Pertussis With 5 Acellular Pertussis Components (Tdap5) Vaccination During Pregnancy. https://clinicaltrialsgov/ct2/show/NCT06258057. 2024.

135. Nct. Effectiveness and Tolerability of Influenza Vaccine in Patients at Risk for Severe and Complicated Influenza. https://clinicaltrialsgov/ct2/show/NCT06286488. 2024.

136. Nct. A Study to Learn About the Vaccine RSVpreF In Pregnant Participants With HIV and Their Infants. https://clinicaltrialsgov/ct2/show/NCT06325657. 2024.

137. Nl O. A PHASE 3, RANDOMIZED, DOUBLE-BLINDED, PLACEBO-CONTROLLED TRIAL TO EVALUATE THE EFFICACY AND SAFETY OF A RESPIRATORY SYNCYTIAL VIRUS (RSV) PREFUSION F SUBUNIT VACCINE IN INFANTS BORN TO WOMEN VACCINATED DURING PREGNANCY Short title: a Phase 3 Trial to Evaluate the Efficacy and Safety of RSVpreF in Infants Born to Women Vaccinated During Pregnancy. https://trialsearchwhoint/Trial2aspx?TrialID=NL-OMON52627. 2020.

138. Nunes MC, Cutland CL, Madhi SA. Influenza Vaccination during Pregnancy and Protection against Pertussis. N Engl J Med. 2018;378(13):1257-8. DOI: 10.1056/NEJMc1705208.

139. O'Grady KA, McHugh L, Nolan T, Richmond P, Wood N, Marshall HS, et al. FluMum: a prospective cohort study of mother-infant pairs assessing the effectiveness of maternal influenza vaccination in prevention of influenza in early infancy. BMJ Open. 2014;4(6):e005676. DOI: 10.1136/bmjopen-2014-005676.

140. Olson SM, Sahni LC, Boom JA, Dawood FS, Munoz FM, Ellington SR. Timing of influenza vaccination during pregnancy. American Journal of Obstetrics & Gynecology MFM. 2024;6(8):101427. DOI: https://dx.doi.org/10.1016/j.ajogmf.2024.101427.

141. Ottawa Hospital Research Institute. Pregnant and Lactating Individuals & Newborns COVID-19 Vaccination (PLAN-V): Prospective Cohort Study. https://clinicaltrialsgov/study/NCT05115617. 2021.

142. Panagiotakopoulos L, Link-Gelles R, Britton A, Tarazi W, Stone A, Ume N, et al. COVID-19 Vaccination Patterns and Timing among Privately Insured Pregnant Persons, 2020-2023. Open Forum Infect Dis. 2025;12:S1232-S3. DOI: 10.1093/ofid/ofae631.2232.

143. Pérez-Latorre L, Ramilo O. SARS-CoV-2 infection vs. vaccination during pregnancy: the placenta leads the way. Curr Opin Infect Dis. 2024;37(5):402-6. DOI: 10.1097/QCO.0000000000001050.

144. Real World Impact and Effectiveness of ABRYSVO® Vaccination During Pregnancy Against RSV Illness in Infants [Internet]. 2024. Available from: https://clinicaltrials.gov/study/NCT06647654.

145. A Phase 3 Study to Investigate the Safety, Tolerability, and Immunogenicity of Revaccinating Pregnant Participants During Subsequent Pregnancies and Persistence of Immunity of a Single Dose of a Bivalent Respiratory Syncytial Virus (RSV) Vaccine [Internet]. 2025. Available from: https://clinicaltrials.gov/study/NCT06866405.

146. STudy of Real World vaccinE Effectiveness of maTernal RSVpreF vaccinatiON Against Respiratory Syncytial Virus (RSV) in Hospitalised Infants in Australia [Internet]. 2025. Available from: https://clinicaltrials.gov/study/NCT07122661.

147. Philipps University M. Neurological Development In Toddlers After Maternal SARS-CoV-2 Infection During Pregnancy. clinicaltrialsgov. 2025.

148. Pool V, Iskander J. Safety of influenza vaccination during pregnancy. Am J Obstet Gynecol. 2006;194(4):1200; author reply 1. DOI: 10.1016/j.ajog.2005.07.091.

149. Prabhu M, Murphy EA, Sukhu AC, Yee J, Singh S, Eng D, et al. Antibody Response to Coronavirus Disease 2019 (COVID-19) Messenger RNA Vaccination in Pregnant Women and Transplacental Passage Into Cord Blood. Obstet Gynecol. 2021;138(2):278-80. DOI: 10.1097/AOG.0000000000004438.

150. Prabhu M, Murphy EA, Sukhu AC, Yee J, Singh S, Eng D, et al. Antibody response to SARS-CoV-2 mRNA vaccines in pregnant women and their neonates. bioRxiv. 2021. DOI: 10.1101/2021.04.05.438524.

151. Pregistry. COVID-19 Vaccines International Pregnancy Exposure Registry (C-VIPER). https://clinicaltrialsgov/study/NCT04705116. 2021.

152. Public Health England. A Trial Comparing Two Pertussis-containing Vaccines in Pregnancy and Vaccine Responses in UK Mothers and Their Infants.

153. Regan AK, Moore HC, Sullivan SG. Does influenza vaccination during early pregnancy really increase the risk of miscarriage? Vaccine. 2018;36(17):2227-8. DOI: 10.1016/j.vaccine.2017.12.033.

154. Roeca C, Polotsky AJ. Influenza vaccination in early pregnancy. Vaccine. 2018;36(17):2229. DOI: 10.1016/j.vaccine.2017.12.032.

155. Shanes ED, Otero S, Mithal LB, Mupanomunda CA, Miller ES, Goldstein JA. Severe Acute Respiratory Syndrome Coronavirus 2 (SARS-CoV-2) Vaccination in Pregnancy: Measures of Immunity and Placental Histopathology. Obstet Gynecol. 2021;138(2):281-3. DOI: 10.1097/AOG.0000000000004457.

156. Simeone R, Payne AB, Newhams MM, Orzel A, Zambrano LD, Lindley M, et al. COVID-19 and RSV Prevention Products in Pregnancy - Overcoming COVID-19 Network, United States, October 2023-March 2024. Open Forum Infect Dis. 2025;12:S1230-S1. DOI: 10.1093/ofid/ofae631.2228.

157. A Phase Ⅲ, Randomized, Double-blind, Positive Controlled Clinical Trial to Evaluate the Immunogenicity and Safety of an Influenza Vaccine (Split Virion), Inactivated, Quadrivalent in Pregnant Women [Internet]. 2025. Available from: https://clinicaltrials.gov/study/NCT07211152.

158. Siu W, Sinilaite A, Papenburg J. Summary of the National Advisory Committee on Immunization (NACI) Updated Guidance on Influenza Vaccination During Pregnancy. Canada communicable disease report = Releve des maladies transmissibles au Canada. 2024;50(3-4):86-92. DOI: 10.14745/ccdr.v50i34a01.

159. Snook ML, Beigi RH, Legro RS, Paules CI. Should women undergoing in vitro fertilization treatment or who are in the first trimester of pregnancy be vaccinated immediately against COVID-19. Fertil Steril. 2021;116(1):16-24. DOI: 10.1016/j.fertnstert.2021.05.083.

160. Sourouni M, Braun J, Oelmeier K, Mollers M, Willy D, Hennies M, et al. Assessment of Neonatal Cord Blood SARS-CoV-2 Antibodies after COVID-19 vaccination in pregnancy. Geburtshilfe Frauenheilkd. 2022;82(10):e164-None. DOI: 10.1055/s-0042-1757056.

161. Steinhoff MC, Omer SB, Roy E, Arifeen SE, Raqib R, Altaye M, et al. Influenza immunization in pregnancy - Antibody responses in mothers and infants. N Engl J Med. 2010;362(17):1644-6. DOI: 10.1056/NEJMc0912599.

162. Tctr. Immunogenicity and safety of various recombinant acellular pertussis-containing vaccines in healthy pregnant women. https://trialsearchwhoint/Trial2aspx?TrialID=TCTR20180725004. 2018.

163. Tctr. Antibody level in cord sera following immunization with recombinant acellular pertussis vaccines during pregnancy: a prospective, observational study. https://wwwthaiclinicaltrialsorg/show/TCTR20200528006. 2020.

164. Tctr. The effectiveness of Influenza vaccination among pregnant women in Nakhon Phanom province, Thailand. https://wwwthaiclinicaltrialsorg/show/TCTR20201014004. 2020.

165. TCTR20201014004. The effectiveness of Influenza vaccination among pregnant women in Nakhon Phanom province&amp;#44; Thailand. 2020.

166. TCTR20250714004. Severe Acute Respiratory Syndrome Coronavirus 2 Antibody Levels in the Neonatal Cord Blood and the Serum of Parturients Who Received Coronavirus Vaccine during Pregnancy at Venerable Thawisak Jutindharo Hospital. 2025.

167. The Second Affiliated Hospital of Wenzhou Medical U. Effects of COVID-19 vaccine injection on pregnancy outcomes of frozen embryo transfer. Chinese Clinical Trial Registry. 2022.

168. Tielsch JM, Steinhoff M, Katz J, Englund JA, Kuypers J, Khatry SK, et al. Designs of two randomized, community-based trials to assess the impact of influenza immunization during pregnancy on respiratory illness among pregnant women and their infants and reproductive outcomes in rural Nepal. BMC Pregnancy Childbirth. 2015;15:40. DOI: 10.1186/s12884-015-0470-y.

169. Treger S, Shiloh SR, Ben-Valid T, Ganor Paz Y, Sharvit M, Bryk G, et al. Transplacental transfer of SARS-CoV-2 antibodies in recovered and BNT162b2-vaccinated patients. Am J Obstet Gynecol. 2022;226(4):587-9.e2. DOI: 10.1016/j.ajog.2021.11.1365.

170. Trostle ME, Aguero-Rosenfeld ME, Roman AS, Lighter JL. High antibody levels in cord blood from pregnant women vaccinated against COVID-19. American Journal of Obstetrics and Gynecology MFM. 2021;3(6). DOI: 10.1016/j.ajogmf.2021.100481.

171. University of Athens. Influenza Vaccine Effectiveness of a Quadrivalent Vaccine in Pregnant Women and Young Infants, 2019-2020.

172. A Phase-IV Individually Randomized, Placebo-controlled Trial on Safety of RSVA/B-preF Vaccine in Pregnant Women and Efficacy Against Severe RSV-associated Lower Respiratory Tract Infection in Infants [Internet]. 2025. Available from: https://clinicaltrials.gov/study/NCT06955728.

173. Urbschat C, Thiele K, Stelzer I, Zhang T, Zhao Y, Kehribar T, et al. Differential cellular immune response in pregnant and non-pregnant women upon vaccination against SARS-CoV-2 infection. J Reprod Immunol. 2023;159. DOI: 10.1016/j.jri.2023.104041.

174. Vanetti C, Garziano M, Murno ML, Trabattoni D, Stracuzzi M, Micheloni M, et al. SARS-COV-2-SPECIFIC NEUTRALIZING ACTIVITY AND CYTOKINE PROFILE IN NEWBORNS OF VACCINATED AND/OR INFECTED AND VACCINATED MOTHERS. Sex Transm Infect. 2024;100:A108-None. DOI: 10.1136/sextrans-ICAR-2024.97.

175. Wang Y, Ren X, Wang Z, Feng X, Li M, Liu P. Receipt of inactivated COVID-19 vaccine had no adverse influence on embryo implantation, clinical pregnancy and miscarriage in early pregnancy. Science China Life sciences. 2022;65(11):2332-4. DOI: 10.1007/s11427-022-2133-3.

176. Watson S, Saleem A, Sathianathan V, Richardson A, Lucas N. Severe SARS-CoV-2 in pregnancy. Int J Obstet Anesth. 2022;50:48. DOI: 10.1016/j.ijoa.2022.103381.

177. Wells B, Walsh M, Soares L, Borland A, Becker A, Zeineddine S. Effects of COVID-19 Vaccination on Nebraska Maternal Health Outcomes. Obstet Gynecol. 2024;143(5):48S-9S.

178. Yang C, Zhao H, Tebbutt SJ. Balancing the Risks and Benefits of COVID-19 Vaccination for Pregnant Women and Their Children. Front Immunol. 2021;12:748456. DOI: 10.3389/fimmu.2021.748456.

179. Yang YJ, Prabhu M, Murphy EA, Singh S, Thompson EM, Hollingsworth A, et al. Impact of timing between tetanus, diphtheria, and pertusis and SARS-CoV-2 messenger RNA vaccinations during pregnancy on SARS-CoV-2 antibody levels at delivery. American Journal of Obstetrics and Gynecology MFM. 2023;5(6). DOI: 10.1016/j.ajogmf.2023.100934.

180. Yusuke M, Lin L, Mary P, Arianna GC, Nida O, Yarden G, et al. Neutralizing Antibody Activity Against SARS-CoV-2 Variants in Gestational Age-Matched Mother-Infant Dyads. medRxiv. 2021. DOI: 10.1101/2021.12.09.21267557.

181. Zauche LH, Wallace B, Smoots AN, Olson CK, Oduyebo T, Kim SY, et al. Receipt of mRNA Covid-19 Vaccines and Risk of Spontaneous Abortion. N Engl J Med. 2021;385(16):1533-5. DOI: 10.1056/NEJMc2113891.

182. Zerbo O, Ray GT, Goddard K, Layefsky E, Fireman B, Klein NP. COVID-19 Vaccine Effectiveness Among Pregnant People. Open Forum Infectious Diseases. 2022;9:S76. DOI: 10.1093/ofid/ofac492.135.

183. Zhao Y, Zhao Y, Zhou Y, Zhang Z, Zhang Y, Li M, et al. Inactivated COVID-19 vaccination and maternal renal function during early pregnancy: A retrospective cohort study of 6397 Chinese pregnant women. J Infect. 2023;86(2):154-225. DOI: 10.1016/j.jinf.2022.11.015.

184. Zuccotti G, Pogliani L, Pariani E, Amendola A, Zanetti A. Transplacental antibody transfer following maternal immunization with a pandemic 2009 influenza A(H1N1) MF59-adjuvanted vaccine. JAMA. 2010;304(21):2360-1. DOI: 10.1001/jama.2010.1729.

185. Zumstein J, Heininger U. Clinical and Epidemiologic Characteristics of Pertussis in Hospitalized Children: A Prospective and Standardized Long-term Surveillance Study. Pediatr Infect Dis J. 2021;40(1):22-5. DOI: 10.1097/INF.0000000000002904.

**Untranslatable language (n = 5)**

1. Berumen-Lechuga MG, Molina-Perez CJ, Garcia-Cortes LR, Munoz-Medina JE, Rosas-Peralta M, Dichi-Romero MLA, et al. [Epidemiological characterization of COVID-2019 in Mexican pregnant women: a cohort study]. Rev Med Inst Mex Seguro Soc. 2023;61(3):314-20.

2. Ghahremani F, Alizadeh L, Havaei M, Rafiei EH, Khalili SM, Ozgoli G, et al. A Review of Pregnancy Outcomes in Pregnant Women Vaccinated Against COVID-19. Journal of Isfahan Medical School. 2022;40(687):718-28. DOI: 10.48305/jims.v40.i687.0718.

3. Mazzilli S, Tavoschi L, Lopalco PL. Tdap vaccination during pregnancy to protect newborns from pertussis infection. Ann Ig. 2018;30(4):346-63. DOI: 10.7416/ai.2018.2226.

4. Teng Z, Qian M, Wei W, Lizhou S, Meilin L. Acute adverse events and pregnancy outcome after inactivated COVID-19 vaccination in first trimester. Chinese Journal of Perinatal Medicine. 2023;26(3):177-85. DOI: 10.3760/cma.j.cn113903-20220830-00791.

5. van der Maas NA, van Aerde K, Bont LJ, Bekker MN, Rots N, de Melker HE. [Infection prevention in newborns through maternal vaccination: current insights and developments]. Ned Tijdschr Geneeskd. 2016;160:D411.

**Full text not retrievable (n=11)**

1. Efficacy of bivalent prefusion F vaccine during pregnancy in preventing respiratory syncytial virus-related diseases in infants: a phase III, double-blind, randomized controlled trial. Chinese Journal of Perinatal Medicine. 2023;26(6):495. DOI: 10.3760/cma.j.issn.1007-9408.2023.06.104.

2. Basutkar RS, Murugan S, Priyan S, Sagadevan S, Sri Hari O, Ramakrishnan AVP. Maternal and Neonatal Outcomes after Vaccination with SARS-CoV-2: A Systematic Review and Meta-analysis of Cohort Studies. Coronaviruses. 2024;5(3). DOI: 10.2174/0126667975269133231117062158.

3. Chulabhorn Hospital. Immunogenicity and safety after vaccinated with BBIBP-CorV (COVID-19 vaccine) in Thai pregnant women. TCTR20210923013. 2021.

4. Jacquerioz F. Grossesse et vaccination contre le Covid-19 : risque-bénéfice. Rev Med Suisse. 2022;18(807):2350. DOI: 10.53738/REVMED.2022.18.807.2350.

5. Nguanboonmak A, Kongsamlee R, Laohakanchanapaiboon J. Pregnancy Outcomes in COVID-19 Vaccination During Pregnancy. J Med Assoc Thai. 2023;106(6):578-83. DOI: 10.35755/jmedassocthai.2023.06.13856.

6. Perú. Ministerio de Salud. Instituto Nacional de S. Effectiveness and safety of vaccines against COVID-19 in pregnant women with more than 12 weeks of gestation. 2021.

7. Scruzzi GF, Franchini CG, Giorgetti AC, Fonseca Ingue L, Sarmiento DD, Belfiore SM, et al. [Safety of respiratory syncytial virus vaccine in pregnant women]. Medicina. 2025;85(5):999-1007.

8. SeyfettiNoglu S, Adiguzel C, Bas S, Arlier S, Narin MA, Narin R, et al. Maternal and perinatal outcomes of sars-cov-2 infection in unvaccinated and vaccinated pregnant patients. J Exp Clin Med. 2023;40(2):312-7. DOI: 10.52142/omujecm.40.2.21.

9. Steinhoff MC, Omer SB, Roy E, Arifeen SE, Raqib R, Altaye M, et al. Influenza immunization in pregnancy and birth weights: observations from a randomized controlled trial. Pediatric academic societies' 2010 annual meeting; 2010 may 1-4; vancouver, canada. 2010.

10. Wang J, Sun S, Du J, Ji H, Liu Y, Liang H. Association between COVID-19 vaccination during pregnancy and the risk of common pregnancy complications and adverse birth outcomes: a meta-analysis. Chinese Journal of Reproduction and Contraception. 2023;43(1):64-72. DOI: 10.3760/cma.j.cn101441-20220927-00416.

11. Woestenberg PJ, Litjens CHC, Vissers LCM, Kant A, Berrens M, Vorstenbosch S. Self-reported maternal adverse events of covid-19 vaccination during pregnancy. Ned Tijdschr Geneeskd. 2023;167(1).

**Preprint with available publication (n = 44)**

1 Balicer, R. *et al.* Effectiveness of the BNT162b2 mRNA COVID-19 Vaccine in Pregnancy. *ResearchSquare* (2021). https://doi.org:10.21203/rs.3.rs-665725/v1

2 Brendolin, M. *et al.* SARS-CoV-2 Infection and Adverse Maternal and Perinatal Outcomes: A Cohort Study of Pregnant People in a Maternity Hospital in Rio de Janeiro, Brazil. *ResearchSquare* (2024). https://doi.org:10.21203/rs.3.rs-5383591/v1

3 Butt, A. *et al.* Effectiveness of the SARS-CoV-2 mRNA Vaccines in Pregnant Women. *Research Square* (2021). https://doi.org:10.21203/rs.3.rs-622782/v1

4 Cahen-Peretz, A. *et al.* Boosting maternal and neonatal anti SARS-CoV-2 humoral immunity using a third mRNA vaccine dose. *Research Square* (2022). https://doi.org:10.21203/rs.3.rs-1381018/v1

5 Cai, Y. *et al.* Prenatal maternal inactivated COVID-19 vaccination: the maternal and neonatal outcomes, a retrospective cohort study. *ResearchSquare* (2023). https://doi.org:10.21203/rs.3.rs-2710503/v1

6 Ciapponi, A. *et al.* Safety of COVID-19 vaccines, their components or their platforms for pregnant women: A rapid review. *MedRxiv : the Preprint Server for Health Sciences* **06**, 06 (2021). https://doi.org:10.1101/2021.06.03.21258283

7 Ciapponi, A. *et al.* Safety of COVID-19 Vaccines During Pregnancy: A Systematic Review and Meta-Analysis. *SSRN* (2022). https://doi.org:10.2139/ssrn.4072487

8 Engjom, H. M. *et al.* Severity of maternal SARS-CoV-2 infection and perinatal outcomes during the Omicron variant dominant period: UK Obstetric Surveillance System national cohort study. *MedRxiv : the Preprint Server for Health Sciences* (2022). https://doi.org:10.1101/2022.03.07.22271699

9 Eve, N. *et al.* Safety and Immunogenicity of an Acellular Pertussis Vaccine Containing Genetically-Detoxified Pertussis Toxin Administered to Pregnant Women Living with and Without HIV and Their New-Borns: A Randomised Controlled Trial in Uganda. *SSRN* (2024). https://doi.org:10.2139/ssrn.4859540

10 Guedalia, J. *et al.* Effectiveness of BNT162b2 mRNA COVID-19 third vaccines during pregnancy: A national observational study in Israel. *ResearchSquare* (2022). https://doi.org:10.21203/rs.3.rs-1834442/v1

11 Hui, L. *et al.* Reductions in stillbirths and preterm birth in COVID-19 vaccinated women: a multi-center cohort study of vaccination uptake and perinatal outcomes. *medRxiv* (2022). https://doi.org:10.1101/2022.07.04.22277193

12 Jasset, M. O. J. *et al.* Longer interval between maternal RSV vaccination and birth increases placental transfer efficiency. *MedRxiv : the Preprint Server for Health Sciences* **15**, 15 (2024). https://doi.org:https://dx.doi.org/10.1101/2024.07.14.24310390

13 Jorgensen, S. *et al.* Effectiveness of Maternal mRNA COVID-19 Vaccination During Pregnancy Against Delta and Omicron SARS-CoV-2 Infection and Hospitalization in Infants: A Test-Negative Design Study. *SSRN Electronic Journal* (2022). https://doi.org:10.2139/ssrn.4246651

14 Kirsebom, F. C. M. *et al.* Vaccine effectiveness against mild and severe disease in pregnant mothers and their infants in England. *MedRxiv : the Preprint Server for Health Sciences* (2023). https://doi.org:10.1101/2023.06.07.23290978

15 Knight, M. *et al.* Perinatal outcomes after admission with COVID-19 in pregnancy: a UK national cohort. *ResearchSquare* (2023). https://doi.org:10.21203/rs.3.rs-3785899/v1

16 Krishna, H. *et al.* Evaluation of safety concerns for COVID-19 immunization of pregnant women: A systematic review of emerging evidence. *Research Square* (2021). https://doi.org:10.21203/rs.3.rs-1102008/v1

17 Lindsay, L. *et al.* Baby and Maternal Outcomes Following SARS-CoV-2 Infection and COVID-19 Vaccination During Pregnancy: A National Population-Based Matched Cohort Study. *SSRN* (2023). https://doi.org:10.2139/ssrn.4322399

18 Madhi, S. A. *et al.* Vaccination of pregnant women with respiratory syncytial virus vaccine and protection of their infants. *N. Engl. J. Med.* **383**, 426‐439 (2020). https://doi.org:10.1056/NEJMoa1908380

19 Mata-Miranda, M. *et al.* Humoral and cellular immune responses analysis using FTIR spectroscopy on newborns of mothers vaccinated against COVID-19 with mRNA or viral vector vaccine. *ResearchSquare* (2024). https://doi.org:10.21203/rs.3.rs-3852008/v1

20 Mensah, A. A. *et al.* Covid-19 vaccine safety in pregnancy, a nested case-control study in births from April 2021 to March 2022, England. *MedRxiv : the Preprint Server for Health Sciences* (2023). https://doi.org:10.1101/2023.10.09.23296737

21 Moro, P. L. *et al.* Safety Monitoring of Bivalent Mrna Covid-19 Vaccine Among Pregnant Persons in the Vaccine Adverse Event Reporting System – United States, September 1, 2022 – March 31, 2023. *SSRN* (2023). https://doi.org:10.2139/ssrn.4591552

22 Munoz, F. M. *et al.* COVID-19 booster vaccination during pregnancy enhances maternal binding and neutralizing antibody responses and transplacental antibody transfer to the newborn (DMID 21-0004). *MedRxiv : the Preprint Server for Health Sciences* **13**, 13 (2022). https://doi.org:10.1101/2022.06.13.22276354

23 Nando Reza, P. *et al.* Covid-19 Vaccination in Pregnancy: A Systematic Review. *MedRxiv : the Preprint Server for Health Sciences* (2021). https://doi.org:10.1101/2021.07.04.21259985

24 Nowakowska, A. *et al.* Timing of Maternal Vaccination Against COVID-19 for Effective Protection of Neonates: A Cohort Study from South Korea. *SSRN* (2023). https://doi.org:10.2139/ssrn.4601309

25 Ofer, B. *et al.* Efficient Maternal to Neonatal transfer of SARS-CoV-2 and BNT162b2 antibodies. *MedRxiv : the Preprint Server for Health Sciences* (2021). https://doi.org:10.1101/2021.03.31.21254674

26 Otero, S. *et al.* Maternal Antibody Response and Transplacental Transfer Following SARS-CoV-2 Infection or Vaccination in Pregnancy. *medRxiv* (2022). https://doi.org:10.1101/2022.03.17.22272574

27 Paixão, E. S. *et al.* Effectiveness of the CoronaVac Vaccine in Prevention of Symptomatic and Progression to Severe COVID-19 in Pregnant Women in Brazil. *SSRN* (2021). https://doi.org:10.2139/ssrn.3962119

28 Pecks, U. *et al.* SARS-CoV-2 infection in pregnant women and incidence of thromboembolic disease – an analysis of the Covid-19 Related Obstetric and Neonatal Outcome Study (CRONOS) in Germany. *ResearchSquare* (2025). https://doi.org:10.21203/rs.3.rs-5911006/v1

29 Piekos, S. N. *et al.* The effect of COVID-19 vaccination and booster on maternal-fetal outcomes: a retrospective multicenter cohort study. *MedRxiv : the Preprint Server for Health Sciences* **18**, 18 (2022). https://doi.org:10.1101/2022.08.12.22278727

30 Popescu, D. E. *et al.* How Much Does SARS-CoV-2 Infection during Pregnancy Affect the Neonatal Brain, Heart and Kidney? A Parallel between COVID-19, Vaccination and Normal Pregnancy. *Preprints* (2024). https://doi.org:10.20944/preprints202401.0285.v1

31 Raffetti, E. *et al.* Association of COVID-19 Infection and Vaccination with Adverse Pregnancy Outcomes: A Population-Wide Cohort Study of 865,654 Pregnant Women in England and Wales. *SSRN* (2024). https://doi.org:10.2139/ssrn.4706364

32 Regan, N. T. *et al.* Pregnancy and birth outcomes after SARS-CoV-2 vaccination in pregnancy. *MedRxiv : the Preprint Server for Health Sciences* (2021). https://doi.org:10.1101/2021.05.17.21257337

33 Rottenstreich, A. *et al.* Early versus late third trimester maternal SARS-CoV-2 BNT162b2 mRNA immunization maximizes transplacental antibody transfer and neonatal neutralizing antibody levels. *medRxiv* (2021). https://doi.org:10.1101/2021.08.30.21262875

34 Sadarangani, M. *et al.* (2022).

35 Satoshi, M. *et al.* Rate of Vertical Transmission of Coronavirus Disease 2019 and Effect of Maternal Vaccination: Evidence from a Multicentre Prospective Cohort Study in Japan. *SSRN* (2023). https://doi.org:10.2139/ssrn.4567963

36 Serra, F. E., Rosa, E. R., de Rossi, P., Francisco, R. P. V. & Rodrigues, A. S. COVID-19: impact of original, Gamma, Delta, and Omicron variants of SARS-CoV-2 in vaccinated and unvaccinated pregnant and postpartum women. *MedRxiv : the Preprint Server for Health Sciences* (2022). https://doi.org:10.1101/2022.10.05.22280754

37 Shaikh, H. *et al.* A Cross sectional Observational Study of Safety and Protective Effects of Maternal Influenza Vaccination on Pregnancy and Birth Outcomes in Pregnant Women from Pune, India. *Pre prints.org* (2023). https://doi.org:10.20944/preprints202304.0025.v1

38 Shook, L. L. *et al.* Durability of anti-Spike antibodies in the infant after maternal COVID-19 vaccination. *MedRxiv : the Preprint Server for Health Sciences* (2021). https://doi.org:10.1101/2021.11.17.21266415

39 sima, m. *et al.* COVID-19 Vaccine Safety Studies among Vulnerable Populations: A Systematic Review and Meta-analysis of 120 Observational Studies and Randomized Clinical Trials. *medRxiv* (2024). https://doi.org:10.1101/2024.12.27.24319417

40 St Clair, L. A. *et al.* Reduced control of SARS-CoV-2 infection is associated with lower mucosal antibody responses in pregnant women. *MedRxiv : the Preprint Server for Health Sciences* **20**, 20 (2023). https://doi.org:10.1101/2023.03.19.23287456

41 Stock*, S. *et al.* Early pregnancy outcomes following COVID-19 vaccination and SARS-CoV-2 infection: a national population-based matched cohort study. *Research Square* (2022). https://doi.org:10.21203/rs.3.rs-1955486/v1

42 Thanyawee, P. *et al.* A Phase 2 Randomised Controlled Dose-Ranging Trial of Recombinant Pertussis Booster Vaccines Containing Genetically Inactivated Pertussis Toxin in Pregnant Women. *SSRN* (2022). https://doi.org:10.2139/ssrn.4196976

43 Wood, R. *et al.* COVID-19 vaccination and SARS-CoV-2 infection in early pregnancy and the risk of major congenital anomalies: a national population-based cohort study. *Research Square* (2022). https://doi.org:10.21203/rs.3.rs-2129185/v1

44 Zerbo, O. *et al.* Maternal SARS-CoV-2 Vaccination and Infant Protection Against SARS-CoV-2 During the First 6 Months of Life. *Research Square* **18**, 18 (2022). https://doi.org:10.21203/rs.3.rs-2143552/v1

**Ineligible comparison (n = 9)**

1. Aldecoa KAT, Arsene C, Krishnamoorthy G, Chng T, Cherry G, Chowdhury N, et al. Risk and Protective Factors for COVID-19 Infection among Pregnant Women with Sickle Cell Trait. Adv Hematol. 2024;2024:1595091. DOI: 10.1155/2024/1595091.

2. Condac C, Lozneanu L, Matasariu DR, Ursache A, Bujor IE, Niță ME, et al. Shedding Light on the COVID-19 Pandemic: Placental Expression of Cell Biomarkers in Negative, Vaccinated, and Positive Pregnant Women. Journal of Clinical Medicine. 2024;13(18). DOI: 10.3390/jcm13185546.

3. Cruz-Calvente M, Rueda-Medina B, Gil-Gutierrez R, Medina-Martinez I, Gomez-Urquiza JL, Correa-Rodriguez M. Impact of SARS-COV-2 Infection on Maternal, Obstetric and Neonatal Outcomes in a Cohort of Vaccinated Women: A Pilot Study. Biol Res Nurs. 2024;26(3):429-37. DOI: https://dx.doi.org/10.1177/10998004241237134.

4. George AA, Suresh D. Effects of Taking COVID-19 Vaccine among Pregnant Women: A Prospective Cohort Study. J South Asian Federation Obstetrics Gynaecol. 2025;17(2):158-62. DOI: 10.5005/jp-journals-10006-2634.

5. Haeberer M, Mengel M, Fan R, Toquero-Asensio M, Martin-Toribio A, Liu Q, et al. Respiratory Syncytial Virus Risk Profile in Hospitalized Infants and Comparison with Influenza and COVID-19 Controls in Valladolid, Spain, 2010–2022. Infectious Diseases and Therapy. 2024;13(11):2395-413. DOI: 10.1007/s40121-024-01058-2.

6. Inceli O, Sonmez C, Inceli EE, Topçu HO, Ibanoglu MC, Engin-Ustun Y. Transplacental Transport Rates of Anti-Pertussis Toxin-IgG and Anti-Filamentous Hemagglutinin-IgG Antibodies in Newborns by Week of Birth. Am J Perinatol. 2024;42(8):1051-8. DOI: 10.1055/a-2457-2721.

7. Kung S, Pike M, Eckert LO, Cheu LA, Paluvayi S, McCartney SA, et al. Comparative Analysis of Transplacental SARS-CoV-2 Antibody Transfer in Pregnancy Phenotypes With Pre-eclampsia and/or Small-for-gestational-age Infants. The Pediatric infectious disease journal. 2025;44(2S):S43-S5. DOI: 10.1097/INF.0000000000004642.

8. Li L, Hou R, Mai Z, Liang L, Li Z, Long B, et al. Impact of Omicron BA.5 infection on maternal and neonatal outcomes. Frontiers in cellular and infection microbiology. 2025;15:1551602. DOI: 10.3389/fcimb.2025.1551602.

9. Nirmanyu HN, Anand P, D'Almeida J. COVID-19 Vaccination and Infection: Effect on Maternal and Cord Blood Antibody Levels at Delivery. J Obstet Gynaecol India. 2025;75(Suppl 1):262-8. DOI: 10.1007/s13224-024-01960-2.

## Supplementary information 2: Studies included for maternal COVID-19 vaccination

1-202203-304

1 Abu Shqara, R. *et al.* Maternal and Cord Anti-SARS-CoV-2-Spike IgG following COVID-19 Vaccination versus Infection during Pregnancy: A Prospective Study, Israel October 2021-March 2022. *Am. J. Perinatol.* (2023). https://doi.org:10.1055/a-2090-5402

2 Ahn, K. H. *et al.* COVID-19 and vaccination during pregnancy: a systematic analysis using Korea National Health Insurance claims data. *Obstetrics & Gynecology Science* **65**, 487-501 (2022). https://doi.org:10.5468/ogs.22060

3 Ali, H., Shahrzad, S., Reza, M., Mohammadreza, K. & Katayoun, A. Maternal and Neonatal Outcomes following COVID-19 Vaccination in Pregnancy. *Research Square* (2022). https://doi.org:10.21203/rs.3.rs-2206595/v1

4 Almutairi, A. *et al.* COVID-19 Vaccine During Pregnancy and Perinatal Outcomes. *Cureus* **15**, e33240 (2023). https://doi.org:10.7759/cureus.33240

5 Alsaleh, R. A. *et al.* Association Between COVID-19 Vaccination and Abortion: A Cross-Sectional Study in Jeddah. *Cureus* **15**, e33836 (2023). https://doi.org:10.7759/cureus.33836

6 Anwar, A. D. *et al.* Mother's Pregnancy Trimester Does Not Affect the Differences of IgG SARS-COV-2 Antibody Levels in Pregnant Women after mRNA and Inactivated Coronavirus Disease 2019 Vaccination. *Open Access Macedonian Journal of Medical Sciences* **11**, 134-140 (2023). https://doi.org:10.3889/oamjms.2023.11237

7 Askary, E., Moradi Alamdarloo, S. & Keshtvarz Hesam Abadi, A. Safety of COVID-19 vaccination in pregnant women and their neonatal outcome: a narrative Review. *J. Matern. Fetal Neonatal Med.* **36**, 2183750 (2023). https://doi.org:10.1080/14767058.2023.2183750

8 Atyeo, C. G. *et al.* Maternal immune response and placental antibody transfer after COVID-19 vaccination across trimester and platforms. *Nature Communications* **13** (2022). https://doi.org:10.1038/s41467-022-31169-8

9 Badell, M. L., Dude, C. M., Rasmussen, S. A. & Jamieson, D. J. Covid-19 vaccination in pregnancy. *BMJ (Clinical research ed.)* **378**, e069741 (2022). https://doi.org:10.1136/bmj-2021-069741

10 Barros, F. C. *et al.* Maternal Vaccination Against COVID-19 and Neonatal Outcomes During Omicron: INTERCOVID-2022 Study. *Am. J. Obstet. Gynecol.* (2024). https://doi.org:10.1016/j.ajog.2024.02.008

11 Beharier, O. *et al.* Efficient maternal to neonatal transfer of antibodies against SARS-CoV-2 and BNT162b2 mRNA COVID-19 vaccine. *J. Clin. Invest.* **131**, 01 (2021). https://doi.org:10.1172/JCI150319

12 Blakeway, H. *et al.* COVID-19 vaccination during pregnancy: coverage and safety. *Am. J. Obstet. Gynecol.* **226**, 236.e231-236.e214 (2022). https://doi.org:10.1016/j.ajog.2021.08.007

13 Bleicher, I., Kadour-Peero, E., Sagi-Dain, L. & Sagi, S. Early exploration of COVID-19 vaccination safety and effectiveness during pregnancy: interim descriptive data from a prospective observational study. *Vaccine* **39**, 6535-6538 (2021). https://doi.org:10.1016/j.vaccine.2021.09.043

14 Boelig, R. C. *et al.* Reduced maternal immunity and vertical transfer of immunity against SARS-CoV-2 variants of concern with COVID-19 exposure or initial vaccination in pregnancy. *Front. Immunol.* **14**, 1216410 (2023). https://doi.org:10.3389/fimmu.2023.1216410

15 Bookstein Peretz, S. *et al.* Short-term outcome of pregnant women vaccinated with BNT162b2 mRNA COVID-19 vaccine. *Ultrasound Obstet. Gynecol.* **58**, 450-456 (2021). https://doi.org:10.1002/uog.23729

16 Brendolin, M. *et al.* Severe maternal morbidity and mortality during the COVID-19 pandemic: a cohort study in Rio de Janeiro. *IJID Regions (Online)* **6**, 1-6 (2023). https://doi.org:10.1016/j.ijregi.2022.11.004

17 Butt, A. A. *et al.* SARS-CoV-2 vaccine effectiveness in preventing confirmed infection in pregnant women. *J. Clin. Invest.* **131**, 01 (2021). https://doi.org:10.1172/JCI153662

18 Cahen-Peretz, A. *et al.* Boosting maternal and neonatal anti-SARS-CoV-2 humoral immunity using a third mRNA vaccine dose. *Jci Insight* **8**, 10 (2023). https://doi.org:10.1172/jci.insight.158646

19 Cai, Y. *et al.* Prenatal maternal inactivated COVID-19 vaccination: the maternal and neonatal outcomes, a retrospective cohort study. *Front. Pharmacol.* **15**, 1299213 (2024). https://doi.org:10.3389/fphar.2024.1299213

20 Calvert, C. *et al.* A population-based matched cohort study of early pregnancy outcomes following COVID-19 vaccination and SARS-CoV-2 infection. *Nature communications* **13**, 6124 (2022). https://doi.org:10.1038/s41467-022-33937-y

21 Calvert, C. *et al.* A population-based matched cohort study of major congenital anomalies following COVID-19 vaccination and SARS-CoV-2 infection. *Nature communications* **14**, 107 (2023). https://doi.org:10.1038/s41467-022-35771-8

22 Carbone, L. *et al.* COVID-19 vaccine and pregnancy outcomes: A systematic review and meta-analysis. *Int. J. Gynaecol. Obstet.* **159**, 651-661 (2022). https://doi.org:10.1002/ijgo.14336

23 Cardemil, C. V. *et al.* Maternal COVID-19 Vaccination and Prevention of Symptomatic Infection in Infants. *Pediatrics* **153**, 01 (2024). https://doi.org:10.1542/peds.2023-064252

24 Carlsen, E. O. *et al.* Association of COVID-19 Vaccination During Pregnancy With Incidence of SARS-CoV-2 Infection in Infants. *JAMA Internal Medicine* **182**, 825-831 (2022). https://doi.org:10.1001/jamainternmed.2022.2442

25 Cassidy, A. G. *et al.* Assessment of Adverse Reactions, Antibody Patterns, and 12-month Outcomes in the Mother-Infant Dyad After COVID-19 mRNA Vaccination in Pregnancy. *JAMA Network Open* **6**, e2323405 (2023). https://doi.org:10.1001/jamanetworkopen.2023.23405

26 Chamani, I. J. *et al.* Coronavirus Disease 2019 (COVID-19) Vaccination and Assisted Reproduction Outcomes: A Systematic Review and Meta-analysis. *Obstet. Gynecol.* **143**, 210-218 (2024). https://doi.org:10.1097/AOG.0000000000005310

27 Chayachinda, C. *et al.* Immunogenicity and reactogenicity of heterologous COVID-19 vaccination in pregnant women. *Hum. Vaccin. Immunother.* **19**, 2228670 (2023). https://doi.org:10.1080/21645515.2023.2228670

28 Chen, W. C. *et al.* Pilot Study on Evaluating the Impact of Tetanus, Diphtheria, and Pertussis (Tdap), Influenza, and COVID-19 Vaccinations on Antibody Responses in Pregnant Women. *Vaccines* **12** (2024). https://doi.org:10.3390/vaccines12030312

29 Chen, W. C. *et al.* TRAIL and IP-10 dynamics in pregnant women post COVID-19 vaccination: associations with neutralizing antibody potency. *Frontiers in Cellular & Infection Microbiology* **14**, 1358967 (2024). https://doi.org:10.3389/fcimb.2024.1358967

30 Chen, W. C. *et al.* Antibodies against SARS-CoV-2 Alpha, Beta, and Gamma Variants in Pregnant Women and Their Neonates under Antenatal Vaccination with Moderna (mRNA-1273) Vaccine. *Vaccines* **10** (2022). https://doi.org:10.3390/vaccines10091415

31 Chiang, C. J. *et al.* Impact of Antenatal SARS-CoV-2 Exposure on SARS-CoV-2 Neutralization Potency. **12**, 05 (2024). https://doi.org:10.3390/vaccines12020164

32 Ciapponi, A. *et al.* Safety of components and platforms of COVID-19 vaccines considered for use in pregnancy: A rapid review. *Vaccine* **39**, 5891-5908 (2021). https://doi.org:10.1016/j.vaccine.2021.08.034

33 Ciapponi, A. *et al.* Safety of COVID-19 vaccines during pregnancy: A systematic review and meta-analysis. *Vaccine* **41**, 3688-3700 (2023). https://doi.org:10.1016/j.vaccine.2023.03.038

34 Citu, I. M. *et al.* The Risk of Spontaneous Abortion Does Not Increase Following First Trimester mRNA COVID-19 Vaccination. *Journal of Clinical Medicine* **11**, 18 (2022). https://doi.org:10.3390/jcm11061698

35 Citu, I. M. *et al.* Immunogenicity Following Administration of BNT162b2 and Ad26.COV2.S COVID-19 Vaccines in the Pregnant Population during the Third Trimester. *Viruses* **14**, 02 (2022). https://doi.org:10.3390/v14020307

36 Conti, M. G. *et al.* Severe Acute Respiratory Syndrome Coronavirus 2 Infection Versus Vaccination in Pregnancy: Implications for Maternal and Infant Immunity. *Clin. Infect. Dis.* **75**, S37-S45 (2022). https://doi.org:10.1093/cid/ciac359

37 Corsi Decenti, E., Salvatore, M. A., Mandolini, D. & Donati, S. Vaccination against SARS-CoV-2 in pregnancy during the Omicron wave: the prospective cohort study of the Italian obstetric surveillance system. *Clin. Microbiol. Infect.* **29**, 772-780 (2023). https://doi.org:10.1016/j.cmi.2023.01.013

38 Craig, A. M. *et al.* Delta Variant Neutralizing Antibody Response following Maternal COVID19 Vaccination. *Am. J. Infect. Control* (2023). https://doi.org:10.1016/j.ajic.2023.09.002

39 da Silva Filho, A. O. *et al.* Levels of Neutralizing Antibodies against SARS-CoV-2 in Mothers and Neonates after Vaccination during Pregnancy. *Vaccines* **11** (2023). https://doi.org:10.3390/vaccines11030620

40 da Silva, M. C. *et al.* Neutralizing antibodies against SARS-CoV-2 in Brazilian pregnant women vaccinated with one or two doses of BNT162b2 mRNA vaccine (Pfizer/Wyeth<sup>TM</sup>). *Frontiers in Public Health* **10**, 1054460 (2022). https://doi.org:10.3389/fpubh.2022.1054460

41 Dagan, N. *et al.* Effectiveness of the BNT162b2 mRNA COVID-19 vaccine in pregnancy. *Nat. Med.* **27**, 1693-1695 (2021). https://doi.org:10.1038/s41591-021-01490-8

42 Danino, D. *et al.* Effectiveness of BNT162b2 Vaccination During Pregnancy in Preventing Hospitalization for Severe Acute Respiratory Syndrome Coronavirus 2 in Infants. *J. Pediatr.* **254**, 48-53.e41 (2023). https://doi.org:10.1016/j.jpeds.2022.09.059

43 Darwin, K. C. *et al.* Reduction in preterm birth among COVID-19-vaccinated pregnant individuals in the United States. *American Journal of Obstetrics & Gynecology MFM* **5**, 101114 (2023). https://doi.org:10.1016/j.ajogmf.2023.101114

44 de Feijter, M., van Gelder, M., Vissers, L. C. M., Kant, A. C. & Woestenberg, P. J. The risk of miscarriage after COVID-19 vaccination before and during pregnancy. *Pharmacoepidemiol. Drug Saf.* **33**, e5724 (2024). https://doi.org:10.1002/pds.5724

45 de Freitas Paganoti, C. *et al.* COVID-19 Vaccines Confer Protection in Hospitalized Pregnant and Postpartum Women with Severe COVID-19: A Retrospective Cohort Study. **10**, 10 (2022). https://doi.org:10.3390/vaccines10050749

46 Deng, H. *et al.* Safety and efficacy of COVID-19 vaccine immunization during pregnancy in 1024 pregnant women infected with the SARS-CoV-2 Omicron virus in Shanghai, China. *Front. Immunol.* **14**, 1303058 (2023). https://doi.org:10.3389/fimmu.2023.1303058

47 Dick, A. *et al.* Safety of SARS-CoV-2 vaccination during pregnancy- obstetric outcomes from a large cohort study. *BMC Pregnancy Childbirth* **22**, 166 (2022). https://doi.org:10.1186/s12884-022-04505-5

48 Dick, A. *et al.* Safety of third SARS-CoV-2 vaccine (booster dose) during pregnancy. *American Journal of Obstetrics & Gynecology MFM* **4**, 100637 (2022). https://doi.org:10.1016/j.ajogmf.2022.100637

49 Ding, C. *et al.* Associations of COVID-19 vaccination during pregnancy with adverse neonatal and maternal outcomes: A systematic review and meta-analysis. *Frontiers in Public Health* **11**, 1044031 (2023). https://doi.org:10.3389/fpubh.2023.1044031

50 Divyamala, K., Ranjan, A. & Kushwaha, R. S. A Hospital-Based Study to Assess the Symptomatology and Course of COVID-19 Infection among Vaccinated and Unvaccinated Pregnant Women. *International Journal of Current Pharmaceutical Review and Research* **15**, 83-88 (2023).

51 Dizdar, M. *et al.* Obstetric Outcomes during COVID-19 Pandemic: Vaccination and Infection in Pregnancy. *Clin. Exp. Obstet. Gynecol.* **51** (2024). https://doi.org:10.31083/j.ceog5101013

52 Du, T., Qu, Q., Zhang, Y. & Huang, Q. No observable influence of COVID-19 inactivated vaccines on pregnancy and birth outcomes in the first trimester of gestation. *Expert Review of Vaccines* **22**, 900-905 (2023). https://doi.org:10.1080/14760584.2023.2271084

53 Dude, C. M. *et al.* Antibody response, neutralizing potency, and transplacental antibody transfer following SARS-CoV-2 infection versus mRNA-1273, BNT162b2 COVID-19 vaccination in pregnancy. *Int. J. Gynaecol. Obstet.* **162**, 154-162 (2023). https://doi.org:10.1002/ijgo.14648

54 Engjom, H. M. *et al.* Severity of maternal SARS-CoV-2 infection and perinatal outcomes of women admitted to hospital during the omicron variant dominant period using UK Obstetric Surveillance System data: prospective, national cohort study. *BMJ Medicine* **1**, e000190 (2022). https://doi.org:10.1136/bmjmed-2022-000190

55 Faherty, E. A. G. *et al.* Pregnancy Outcomes among Pregnant Persons after COVID-19 Vaccination: Assessing Vaccine Safety in Retrospective Cohort Analysis of U.S. National COVID Cohort Collaborative (N3C). **12**, 11 (2024). https://doi.org:10.3390/vaccines12030289

56 Favre, G. *et al.* Risk of congenital malformation after first trimester mRNA COVID-19 vaccine exposure in pregnancy: the COVI-PREG prospective cohort. *Clin. Microbiol. Infect.* **29**, 1306-1312 (2023). https://doi.org:10.1016/j.cmi.2023.06.015

57 Favre, G. *et al.* COVID-19 mRNA vaccine in pregnancy: Results of the Swiss COVI-PREG registry, an observational prospective cohort study. *The Lancet Regional Health. Europe* **18**, 100410 (2022). https://doi.org:10.1016/j.lanepe.2022.100410

58 Fell, D. B. *et al.* Association of COVID-19 Vaccination in Pregnancy With Adverse Peripartum Outcomes. *Obstet. Gynecol. Surv.* **77**, 570-572 (2022). https://doi.org:10.1097/OGX.0000000000001088

59 Fell, D. B. *et al.* Association of COVID-19 Vaccination in Pregnancy With Adverse Peripartum Outcomes. *JAMA* **327**, 1478-1487 (2022). https://doi.org:10.1001/jama.2022.4255

60 Fell, D. B. *et al.* Risk of preterm birth, small for gestational age at birth, and stillbirth after covid-19 vaccination during pregnancy: population based retrospective cohort study. *BMJ* **378**, e071416 (2022). https://doi.org:10.1136/bmj-2022-071416

61 Fell, D. B. *et al.* Pregnancy, fetal, and neonatal outcomes after a first booster dose of covid-19 vaccine during pregnancy in Ontario, Canada: population based, retrospective cohort study. *BMJ Medicine* **2**, e000632 (2023). https://doi.org:10.1136/bmjmed-2023-000632

62 Fernandez-Garcia, S. *et al.* Effectiveness and safety of COVID-19 vaccines on maternal and perinatal outcomes: a systematic review and meta-analysis. *BMJ Global Health* **9**, 04 (2024). https://doi.org:10.1136/bmjgh-2023-014247

63 Flannery, D. D. *et al.* Comparison of Maternal and Neonatal Antibody Levels After COVID-19 Vaccination vs SARS-CoV-2 Infection. *JAMA Network Open* **5**, e2240993 (2022). https://doi.org:10.1001/jamanetworkopen.2022.40993

64 Fu, W. *et al.* Systematic review of the safety, immunogenicity, and effectiveness of COVID-19 vaccines in pregnant and lactating individuals and their infants. *Int. J. Gynaecol. Obstet.* **156**, 406-417 (2022). https://doi.org:10.1002/ijgo.14008

65 Gastesi Orbegozo, I., Cea-Soriano, L., Llorente, A. & Huerta-Alvarez, C. Lack of association between COVID-19 vaccines and miscarriage onset using a case-crossover design. *Sci. Rep.* **14**, 7275 (2024). https://doi.org:10.1038/s41598-024-57880-8

66 Gaur, P. *et al.* The relationship between COVID-19 vaccination status in pregnancy and birthweight. *American Journal of Obstetrics & Gynecology MFM* **5**, 101057 (2023). https://doi.org:10.1016/j.ajogmf.2023.101057

67 Ghesquiere, L. *et al.* Impact of COVID-19 and Vaccination During Pregnancy on Placenta-Mediated Complications (COVIGRO Study). *Journal of Obstetrics & Gynaecology Canada: JOGC*, 102291 (2023). https://doi.org:10.1016/j.jogc.2023.102291

68 Goldshtein, I. *et al.* Association Between BNT162b2 Vaccination and Incidence of SARS-CoV-2 Infection in Pregnant Women. *JAMA* **326**, 728-735 (2021). https://doi.org:10.1001/jama.2021.11035

69 Goldshtein, I. *et al.* Association of BNT162b2 COVID-19 Vaccination During Pregnancy With Neonatal and Early Infant Outcomes. *JAMA Pediatrics* **176**, 470-477 (2022). https://doi.org:10.1001/jamapediatrics.2022.0001

70 Gong, Y. *et al.* Immune response and safety of inactivated SARS-CoV-2 vaccines during pregnancy: a real-world observational study. *Expert Review of Vaccines* **22**, 956-963 (2023). https://doi.org:10.1080/14760584.2023.2272655

71 Gray, K. J. *et al.* Coronavirus disease 2019 vaccine response in pregnant and lactating women: a cohort study. *Am. J. Obstet. Gynecol.* **225**, 303.e301-303.e317 (2021). https://doi.org:10.1016/j.ajog.2021.03.023

72 Guedalia, J. *et al.* Maternal hybrid immunity and risk of infant COVID-19 hospitalizations: national case-control study in Israel. *Nature communications* **15**, 2846 (2024). https://doi.org:10.1038/s41467-024-46694-x

73 Guedalia, J. *et al.* Effectiveness of a third BNT162b2 mRNA COVID-19 vaccination during pregnancy: a national observational study in Israel. *Nature communications* **13**, 6961 (2022). https://doi.org:10.1038/s41467-022-34605-x

74 Guedalia, J. *et al.* Effectiveness of BNT162b2 mRNA COVID-19 Third Vaccines During Pregnancy: A National Observational Study in Israel. *SSRN* (2022). https://doi.org:10.2139/ssrn.4159559

75 Hagrass, A. I. *et al.* Maternal and neonatal safety outcomes after SAR-CoV-2 vaccination during pregnancy: a systematic review and meta-analysis. *BMC Pregnancy Childbirth* **22**, 581 (2022). https://doi.org:10.1186/s12884-022-04884-9

76 Halasa, N. B. *et al.* Effectiveness of Maternal Vaccination with mRNA COVID-19 Vaccine During Pregnancy Against COVID-19-Associated Hospitalization in Infants Aged <6 Months - 17 States, July 2021-January 2022. *MMWR - Morbidity & Mortality Weekly Report* **71**, 264-270 (2022). https://doi.org:10.15585/mmwr.mm7107e3

77 Halasa, N. B. *et al.* Maternal Vaccination and Risk of Hospitalization for Covid-19 among Infants. *Obstet. Gynecol. Surv.* **78**, 3-5 (2023). https://doi.org:10.1097/01.ogx.0000912568.67045.6f

78 Hameed, I. *et al.* Is it safe and effective to administer COVID-19 vaccines during pregnancy? A systematic review and meta-analysis. *Am. J. Infect. Control* **51**, 582-593 (2023). https://doi.org:10.1016/j.ajic.2022.08.014

79 Hantoushzadeh, S. *et al.* Impact of COVID-19 and vaccination on first and second trimester screening results. *Cytokine* **168**, 156228 (2023). https://doi.org:10.1016/j.cyto.2023.156228

80 Hatami, D. *et al.* Perinatal outcomes and sinopharm BBIBP-CorV vaccination during pregnancy. *BMC Pregnancy Childbirth* **24**, 190 (2024). https://doi.org:10.1186/s12884-024-06389-z

81 Hui, L. *et al.* Reductions in stillbirths and preterm birth in COVID-19-vaccinated women: a multicenter cohort study of vaccination uptake and perinatal outcomes. *Am. J. Obstet. Gynecol.* **228**, 585.e581-585.e516 (2023). https://doi.org:10.1016/j.ajog.2022.10.040

82 Iannaccone, A. *et al.* The Importance of Vaccination, Variants and Time Point of SARS-CoV-2 Infection in Pregnancy for Stillbirth and Preterm Birth Risk: An Analysis of the CRONOS Register Study. *Journal of Clinical Medicine* **13**, 07 (2024). https://doi.org:10.3390/jcm13061522

83 Ibroci, E. *et al.* Impact of prenatal COVID-19 vaccination on delivery and neonatal outcomes: Results from a New York City cohort. *Vaccine* **41**, 649-656 (2023). https://doi.org:10.1016/j.vaccine.2022.09.095

84 Jarraya, A. *et al.* Impact of COVID-19 vaccination among pregnant women requiring hospital admission: prospective observational research. *Italian Journal of Gynaecology and Obstetrics* **35**, 211-218 (2023). https://doi.org:10.36129/jog.2022.53

85 Jaswa, E. G. *et al.* In Utero Exposure to Maternal COVID-19 Vaccination and Offspring Neurodevelopment at 12 and 18 Months. *JAMA Pediatrics* **178**, 258-265 (2024). https://doi.org:10.1001/jamapediatrics.2023.5743

86 Jorgensen, S. C. J. *et al.* Newborn and Early Infant Outcomes Following Maternal COVID-19 Vaccination During Pregnancy. *JAMA Pediatrics* **177**, 1314-1323 (2023). https://doi.org:10.1001/jamapediatrics.2023.4499

87 Jorgensen, S. C. J. *et al.* Maternal mRNA covid-19 vaccination during pregnancy and delta or omicron infection or hospital admission in infants: test negative design study. *BMJ* **380**, e074035 (2023). https://doi.org:10.1136/bmj-2022-074035

88 Juttukonda, L. J. *et al.* The impact of maternal SARS-CoV-2 vaccination and first trimester infection on feto-maternal immune responses. *Am. J. Reprod. Immunol.* **88**, e13625 (2022). https://doi.org:10.1111/aji.13625

89 Kachikis, A. *et al.* Timing of Maternal COVID-19 Vaccine and Antibody Concentrations in Infants Born Preterm. *JAMA Network Open* **7**, e2352387 (2024). https://doi.org:10.1001/jamanetworkopen.2023.52387

90 Kashani-Ligumsky, L. *et al.* Titers of SARS CoV-2 antibodies in cord blood of neonates whose mothers contracted SARS CoV-2 (COVID-19) during pregnancy and in those whose mothers were vaccinated with mRNA to SARS CoV-2 during pregnancy. *J. Perinatol.* **41**, 2621-2624 (2021). https://doi.org:10.1038/s41372-021-01216-1

91 Kharbanda, E. O. *et al.* COVID-19 Booster Vaccination in Early Pregnancy and Surveillance for Spontaneous Abortion. *JAMA Network Open* **6**, e2314350 (2023). https://doi.org:10.1001/jamanetworkopen.2023.14350

92 Kigel, A. *et al.* Maternal Immunization During the Second Trimester with BNT162b2 mRNA Vaccine Induces a Robust IgA Response in Human Milk: A Prospective Cohort Study. *Am. J. Clin. Nutr.* **118**, 572-578 (2023). https://doi.org:10.1016/j.ajcnut.2023.07.013

93 Kim, H. *et al.* Impact of vaccination and the omicron variant on COVID-19 severity in pregnant women. *Am. J. Infect. Control* **51**, 351-353 (2023). https://doi.org:10.1016/j.ajic.2022.07.023

94 Kirsebom, F. C. M. *et al.* Vaccine effectiveness against mild and severe covid-19 in pregnant individuals and their infants in England: test negative case-control study. *BMJ medicine* **3**, e000696 (2024). https://doi.org:10.1136/bmjmed-2023-000696

95 Komine-Aizawa, S. *et al.* The vaccination status and adverse effects of COVID-19 vaccine among pregnant women in Japan in 2021. *J. Obstet. Gynaecol. Res.* **48**, 1561-1569 (2022). https://doi.org:10.1111/jog.15285

96 Kontovazainitis, C. G., Katsaras, G. N., Gialamprinou, D. & Mitsiakos, G. Covid-19 vaccination and pregnancy: a systematic review of maternal and neonatal outcomes. *J. Perinat. Med.* **51**, 823-839 (2023). https://doi.org:10.1515/jpm-2022-0463

97 Kreuzberger, N. *et al.* Immunity after COVID-19 vaccination in people with higher risk of compromised immune status: a scoping review. *Cochrane Database Syst. Rev.* **8**, CD015021 (2022). https://doi.org:10.1002/14651858.CD015021

98 Krishna, H. *et al.* Evaluation of Safety Concerns for COVID-19 Immunization of Pregnant Women: a Systematic Review of Emerging Evidence. *Maedica* **17**, 963-984 (2022). https://doi.org:10.26574/maedica.2022.17.4.963

99 Kugelman, N. *et al.* Maternal and Neonatal Severe Acute Respiratory Syndrome Coronavirus 2 (SARS-CoV-2) Immunoglobulin G Levels After the Pfizer-BioNTech Booster Dose for Coronavirus Disease 2019 (COVID-19) Vaccination During the Second Trimester of Pregnancy. *Obstet. Gynecol.* **140**, 187-193 (2022). https://doi.org:10.1097/AOG.0000000000004867

100 Kugelman, N., Riskin, A., Kedar, R. & Riskin-Mashiah, S. Safety of COVID-19 vaccination in pregnant women: A study of the adverse perinatal outcomes. *Int. J. Gynaecol. Obstet.* **161**, 298-302 (2023). https://doi.org:10.1002/ijgo.14599

101 La Fauci, L. *et al.* Anti-Severe Acute Respiratory Syndrome Coronavirus 2 IgG Is Present in the Amniotic Fluid of both Infected and Vaccinated Women at Second Trimester of Pregnancy: A Cohort Study. *Fetal Diagn. Ther.* **50**, 415-421 (2023). https://doi.org:10.1159/000531781

102 Lam, J. N., Nehira, J., Phung, O. & Deng, B. Systematic Review: Safety and Efficacy of mRNA COVID-19 Vaccines in Pregnant Women. *J. Pharm. Pract.*, 8971900231196065 (2023). https://doi.org:10.1177/08971900231196065

103 Lapinsky, S. C. *et al.* A Population-Based Test-Negative Matched Case-Control Analysis of SARS-CoV-2 Vaccine Effectiveness Among Pregnant People in Ontario, Canada. *Journal of Obstetrics & Gynaecology Canada: JOGC* **46**, 102239 (2024). https://doi.org:10.1016/j.jogc.2023.102239

104 Lauritsen, C. J. *et al.* Passive antibody transfer from pregnant women to their fetus are maximized after SARS-CoV-2 vaccination irrespective of prior infection. *The Journal of Allergy and Clinical Immunology Global* **3**, 100189 (2024). https://doi.org:10.1016/j.jacig.2023.100189

105 Law, K. S., Hsu, Y. T. & Chen, H. P. Preliminary results of COVID-19 vaccination among Taiwanese pregnant women: A single-center, prospective, case-control study. *Int. J. Gynaecol. Obstet.* **162**, 133-138 (2023). https://doi.org:10.1002/ijgo.14682

106 Lindsay, L. *et al.* Neonatal and maternal outcomes following SARS-CoV-2 infection and COVID-19 vaccination: a population-based matched cohort study. *Nature Communications* **14**, 5275 (2023). https://doi.org:10.1038/s41467-023-40965-9

107 Lipkind, H. S. *et al.* Receipt of COVID-19 Vaccine During Pregnancy and Preterm or Small-for-Gestational-Age at Birth - Eight Integrated Health Care Organizations, United States, December 15, 2020-July 22, 2021. *MMWR - Morbidity & Mortality Weekly Report* **71**, 26-30 (2022). https://doi.org:10.15585/mmwr.mm7101e1

108 Lu, L., Wang, L., Feng, T. & Du, X. Safety evaluation of COVID-19 vaccination during early pregnancy: A single-center prospective cohort study of Chinese pregnant women. *Hum. Vaccin. Immunother.* **19**, 2226995 (2023). https://doi.org:10.1080/21645515.2023.2226995

109 Lubrano, C. *et al.* Immune Response and Transplacental Antibody Transfer in Pregnant Women after COVID-19 Vaccination. *Journal of Personalized Medicine* **13** (2023). https://doi.org:10.3390/jpm13040689

110 Ma, Y. *et al.* Effectiveness and Safety of COVID-19 Vaccine among Pregnant Women in Real-World Studies: A Systematic Review and Meta-Analysis. **10**, 06 (2022). https://doi.org:10.3390/vaccines10020246

111 Ma, Y., Shan, Z., Gu, Y. & Huang, Y. Safety and efficacy of inactivated COVID-19 vaccines in women vaccinated during the first trimester of pregnancy. *Int. J. Infect. Dis.* **130**, 196-202 (2023). https://doi.org:10.1016/j.ijid.2023.03.017

112 Magnus, M. C. *et al.* Association of SARS-CoV-2 Vaccination During Pregnancy With Pregnancy Outcomes. *JAMA* **327**, 1469-1477 (2022). https://doi.org:10.1001/jama.2022.3271

113 Maguire, S. *et al.* Obstetric outcomes in women with rheumatic disease and COVID-19 in the context of vaccination status. *Rheumatology* **62**, 1621-1626 (2023). https://doi.org:10.1093/rheumatology/keac534

114 Mansour, O., Hernandez-Diaz, S. & Wyszynski, D. F. mRNA COVID-19 vaccination early in pregnancy and the risk of spontaneous abortion in an international pregnancy registry. *Pharmacoepidemiol. Drug Saf.* **32**, 685-693 (2023). https://doi.org:10.1002/pds.5600

115 Marchand, G. *et al.* Maternal and neonatal outcomes of COVID-19 vaccination during pregnancy, a systematic review and meta-analysis. *Npj Vaccines* **8**, 103 (2023). https://doi.org:10.1038/s41541-023-00698-8

116 Martinez-Varea, A. *et al.* Comparison of Maternal-Fetal Outcomes among Unvaccinated and Vaccinated Pregnant Women with COVID-19. *Journal of Personalized Medicine* **12**, 03 (2022). https://doi.org:10.3390/jpm12122008

117 Mascolo, A. *et al.* Maternal, fetal and neonatal outcomes among pregnant women receiving COVID-19 vaccination: The preg-co-vax study. *Front. Immunol.* **13**, 965171 (2022). https://doi.org:10.3389/fimmu.2022.965171

118 Matsui, Y. *et al.* Neutralizing antibody activity against SARS-CoV-2 variants in gestational age-matched mother-infant dyads after infection or vaccination. *JCI Insight* **7** (2022). https://doi.org:10.1172/jci.insight.157354

119 McClymont, E. *et al.* Reactogenicity, pregnancy outcomes, and SARS-CoV-2 infection following COVID-19 vaccination during pregnancy in Canada: A national prospective cohort study. *Vaccine* **41**, 7183-7191 (2023). https://doi.org:10.1016/j.vaccine.2023.10.032

120 Mendenhall, E. *et al.* Examination of cord blood at birth in women with SARS-CoV-2 exposure and/or vaccination during pregnancy and relationship to fetal complete blood count, cortisol, ferritin, vitamin D, and CRP. *Frontiers in Pediatrics* **11**, 1092561 (2023). https://doi.org:10.3389/fped.2023.1092561

121 Mensah, A. *et al.* COVID-19 Vaccine Safety in Pregnancy, A Nested Case–Control Study in Births From April 2021 to March 2022, England. *BJOG* **131**, 1882-1893 (2024). https://doi.org:10.1111/1471-0528.17949

122 Morgan, J. A. *et al.* Pregnancy Outcomes in Patients After Completion of the mRNA Coronavirus Disease 2019 (COVID-19) Vaccination Series Compared With Unvaccinated Patients. *Obstet. Gynecol.* **141**, 555-562 (2023). https://doi.org:10.1097/AOG.0000000000005072

123 Moro, P. L. *et al.* Safety monitoring of bivalent mRNA COVID-19 vaccine among pregnant persons in the vaccine adverse event reporting System - United States, September 1, 2022 - March 31, 2023. *Vaccine* **42**, 2380-2384 (2024). https://doi.org:10.1016/j.vaccine.2024.02.084

124 Moro, P. L. *et al.* Post-authorization surveillance of adverse events following COVID-19 vaccines in pregnant persons in the vaccine adverse event reporting system (VAERS), December 2020 - October 2021. *Vaccine* **40**, 3389-3394 (2022). https://doi.org:10.1016/j.vaccine.2022.04.031

125 Moro, P. L., Olson, C. K., Zhang, B., Marquez, P. & Strid, P. Safety of Booster Doses of Coronavirus Disease 2019 (COVID-19) Vaccine in Pregnancy in the Vaccine Adverse Event Reporting System. *Obstet. Gynecol.* **140**, 421-427 (2022). https://doi.org:10.1097/AOG.0000000000004889

126 Moza, A. *et al.* Pregnancy Outcomes in SARS-CoV-2-Positive Patients: A 20-Month Retrospective Analysis of Delivery Cases. *Medicina (Kaunas)* **59** (2023). https://doi.org:10.3390/medicina59020341

127 Munoz, F. M. *et al.* COVID-19 booster vaccination during pregnancy enhances maternal binding and neutralizing antibody responses and transplacental antibody transfer to the newborn. *Vaccine* **41**, 5296-5303 (2023). https://doi.org:10.1016/j.vaccine.2023.06.032

128 Murphy, E. A. *et al.* SARS-CoV-2 vaccination, booster, and infection in pregnant population enhances passive immunity in neonates. *Nature communications* **14**, 4598 (2023). https://doi.org:10.1038/s41467-023-39989-y

129 Nevo, L. *et al.* Boosting maternal and neonatal humoral immunity following SARS-CoV-2 infection using a single messenger RNA vaccine dose. *Am. J. Obstet. Gynecol.* **227**, 486.e481-486.e410 (2022). https://doi.org:10.1016/j.ajog.2022.04.010

130 Ng, D. C. *et al.* Clinical characteristics of COVID-19 in hospitalized young infants and risk factors for disease severity. *Pediatr. Int.* **65**, e15565 (2023). https://doi.org:10.1111/ped.15565

131 Norman, M. *et al.* Neonatal Outcomes After COVID-19 Vaccination in Pregnancy. *JAMA* **331**, 396-407 (2024). https://doi.org:10.1001/jama.2023.26945

132 Novillo, B. & Martinez-Varea, A. COVID-19 Vaccines during Pregnancy and Breastfeeding: A Systematic Review. *Journal of Personalized Medicine* **13**, 25 (2022). https://doi.org:10.3390/jpm13010040

133 Nowakowska, A. *et al.* Timing of maternal vaccination against COVID-19 for effective protection of neonates: cohort study. *Front. Immunol.* **15**, 1359209 (2024). https://doi.org:10.3389/fimmu.2024.1359209

134 Otero, S. *et al.* Maternal Antibody Response and Transplacental Transfer Following Severe Acute Respiratory Syndrome Coronavirus 2 Infection or Vaccination in Pregnancy. *Clin. Infect. Dis.* **76**, 220-228 (2023). https://doi.org:10.1093/cid/ciac793

135 Oz-Alcalay, L. *et al.* The association of neonatal SARS-CoV-2 anti-spike protein receptor-binding domain antibodies at delivery with infant SARS-CoV-2 infection under the age of 6 months: a prospective cohort study. *Clin. Microbiol. Infect.* **29**, 789-794 (2023). https://doi.org:10.1016/j.cmi.2023.01.023

136 Ozer, E., Cagliyan, E. & Cagaptay, S. Vaccination is preventing development of placental pathologies in SARS-CoV-2 infected pregnant patients. *J. Neonatal Perinatal Med.* **16**, 235-237 (2023). https://doi.org:10.3233/NPM-221141

137 Paixao, E. S. *et al.* CoronaVac vaccine is effective in preventing symptomatic and severe COVID-19 in pregnant women in Brazil: a test-negative case-control study. *BMC Med.* **20**, 146 (2022). https://doi.org:10.1186/s12916-022-02353-w

138 Pandit, N. B. *et al.* How safe is COVID-19 vaccination among pregnant women and its outcome - A hospital-based retrospective study in Indian population. *Journal of Family Medicine & Primary Care* **12**, 2140-2145 (2023). https://doi.org:10.4103/jfmpc.jfmpc_333_23

139 Peretz-Machluf, R. *et al.* Obstetric and Early Neonatal Outcomes Following Second and Third COVID-19 Vaccination in Pregnancy. *Isr. Med. Assoc. J.* **26**, 12-17 (2024).

140 Peretz-Machluf, R. *et al.* Obstetric and Neonatal Outcomes following COVID-19 Vaccination in Pregnancy. *Journal of Clinical Medicine* **11**, 30 (2022). https://doi.org:10.3390/jcm11092540

141 Piekos, S. N. *et al.* Effect of COVID-19 vaccination and booster on maternal-fetal outcomes: a retrospective cohort study. *The Lancet. Digital Health* **5**, e594-e606 (2023). https://doi.org:10.1016/S2589-7500(23)00093-6

142 Plitman Mayo, R. *et al.* Waning of the Humoral Response to SARS-CoV-2 in Pregnancy is Variant-Dependent. *MedRxiv : the Preprint Server for Health Sciences* (2021). https://doi.org:10.1101/2021.11.03.21265478

143 Popescu, D. E. *et al.* How Much Does SARS-CoV-2 Infection during Pregnancy Affect the Neonatal Brain, Heart, and Kidney? A Parallel between COVID-19, Vaccination, and Normal Pregnancy. *Life* **14**, 05 (2024). https://doi.org:10.3390/life14020224

144 Prasad, S. *et al.* Systematic review and meta-analysis of the effectiveness and perinatal outcomes of COVID-19 vaccination in pregnancy. *Nature communications* **13**, 2414 (2022). https://doi.org:10.1038/s41467-022-30052-w

145 Pratama, N. R. *et al.* mRNA Covid-19 vaccines in pregnancy: A systematic review. *PLoS ONE [Electronic Resource]* **17**, e0261350 (2022). https://doi.org:10.1371/journal.pone.0261350

146 Qin, Q. *et al.* Evaluating Vaccine Effectiveness Via Post-COVID-19 Vaccination Breakthrough Infections Among Pregnant and Non-Pregnant Persons in the U.S.: Retrospective Cohort Analysis from a Nationally-Sampled Cohort in N3C. *SSRN* (2022). https://doi.org:10.2139/ssrn.4174295

147 Raffetti, E. *et al.* COVID-19 diagnosis, vaccination during pregnancy, and adverse pregnancy outcomes of 865,654 women in England and Wales: a population-based cohort study. *Lancet. Reg. Health. Eur.* **45**, 101037 (2024). https://doi.org:10.1016/j.lanepe.2024.101037

148 Rahmati, M. *et al.* Effects of COVID-19 vaccination during pregnancy on SARS-CoV-2 infection and maternal and neonatal outcomes: A systematic review and meta-analysis. *Rev. Med. Virol.* **33**, e2434 (2023). https://doi.org:10.1002/rmv.2434

149 Rawal, S., Tackett, R. L., Stone, R. H. & Young, H. N. COVID-19 vaccination among pregnant people in the United States: a systematic review. *American Journal of Obstetrics & Gynecology MFM* **4**, 100616 (2022). https://doi.org:10.1016/j.ajogmf.2022.100616

150 Rimmer, M. P., Teh, J. J., Mackenzie, S. C. & Al Wattar, B. H. The risk of miscarriage following COVID-19 vaccination: a systematic review and meta-analysis. *Hum. Reprod.* **38**, 840-852 (2023). https://doi.org:10.1093/humrep/dead036

151 Rottenstreich, A. *et al.* Maternal and Neonatal Severe Acute Respiratory Syndrome Coronavirus 2 Omicron Variant Neutralization after Antenatal Messenger RNA Vaccination. *Clin. Infect. Dis.* **75**, 2023-2026 (2022). https://doi.org:10.1093/cid/ciac395

152 Rottenstreich, A. *et al.* Kinetics of Maternally Derived Anti-Severe Acute Respiratory Syndrome Coronavirus 2 (SARS-CoV-2) Antibodies in Infants in Relation to the Timing of Antenatal Vaccination. *Clin. Infect. Dis.* **76**, E274-E279 (2023). https://doi.org:10.1093/cid/ciac480

153 Rottenstreich, A. *et al.* The Effect of Gestational Age at BNT162b2 mRNA Vaccination on Maternal and Neonatal Severe Acute Respiratory Syndrome Coronavirus 2 (SARS-CoV-2) Antibody Levels. *Clin. Infect. Dis.* **75**, E603-E610 (2022). https://doi.org:10.1093/cid/ciac135

154 Rottenstreich, A. *et al.* Timing of SARS-CoV-2 vaccination during the third trimester of pregnancy and transplacental antibody transfer: a prospective cohort study. *Clin. Microbiol. Infect.* **28**, 419-425 (2022). https://doi.org:10.1016/j.cmi.2021.10.003

155 Rottenstreich, M., Rotem, R., Wiener-Well, Y., Grisaru-Granovsky, S. & Sela, H. Y. Covid-19 third vaccination during pregnancy: maternal and neonatal outcomes-a retrospective study. *Arch. Gynecol. Obstet.* **308**, 1197-1205 (2023). https://doi.org:10.1007/s00404-022-06786-9

156 Rottenstreich, M. *et al.* Covid-19 vaccination during the third trimester of pregnancy: rate of vaccination and maternal and neonatal outcomes, a multicentre retrospective cohort study. *BJOG* **129**, 248-255 (2022). https://doi.org:10.1111/1471-0528.16941

157 Ruderman, R. S. *et al.* Association of COVID-19 Vaccination During Early Pregnancy With Risk of Congenital Fetal Anomalies. *Obstet. Gynecol. Surv.* **78**, 5-6 (2023). https://doi.org:10.1097/01.ogx.0000912572.55034.1b

158 Sabharwal, V. *et al.* Cytokine levels in maternal and infant blood after COVID-19 vaccination during pregnancy in comparison with unvaccinated controls. *J. Reprod. Immunol.* **156**, 103821 (2023). https://doi.org:10.1016/j.jri.2023.103821

159 Sabharwal, V. *et al.* Comparison of Anti-SARS-CoV-2-Specific Antibody Signatures in Maternal and Infant Blood after COVID-19 Infection versus COVID-19 Vaccination during Pregnancy. *Am. J. Perinatol.* **31**, 31 (2023). https://doi.org:10.1055/a-2183-9109

160 Sadarangani, M. *et al.* Safety of COVID-19 vaccines in pregnancy: a Canadian National Vaccine Safety (CANVAS) network cohort study. *The Lancet Infectious Diseases* **22**, 1553-1564 (2022). https://doi.org:10.1016/S1473-3099(22)00426-1

161 Santimano, A. J. *et al.* Efficacy and Clinical Outcomes of mRNA COVID-19 Vaccine in Pregnancy: A Systematic Review and Meta-analysis. *Intervirology* **02**, 02 (2024). https://doi.org:10.1159/000538135

162 Schrag, S. J. *et al.* Estimation of COVID-19 mRNA Vaccine Effectiveness Against Medically Attended COVID-19 in Pregnancy During Periods of Delta and Omicron Variant Predominance in the United States. *JAMA Network Open* **5**, e2233273 (2022). https://doi.org:10.1001/jamanetworkopen.2022.33273

163 Serra, F. E., Rosa Junior, E. R., de Rossi, P., Francisco, R. P. V. & Rodrigues, A. S. COVID-19: Impact of Original, Gamma, Delta, and Omicron Variants of SARS-CoV-2 in Vaccinated and Unvaccinated Pregnant and Postpartum Women. **10**, 17 (2022). https://doi.org:10.3390/vaccines10122172

164 SeyedAlinaghi, S. *et al.* Complications of COVID-19 Vaccines during Pregnancy; a Systematic Review. *Archives of Academic Emergency Medicine* **10**, e76 (2022). https://doi.org:10.22037/aaem.v10i1.1622

165 Shafiee, A. *et al.* COVID-19 vaccination during pregnancy: a systematic review and meta-analysis. *BMC Pregnancy Childbirth* **23**, 45 (2023). https://doi.org:10.1186/s12884-023-05374-2

166 Shen, C. J. *et al.* Evaluation of Transplacental Antibody Transfer in SARS-CoV-2-Immunized Pregnant Women. **10**, 10 (2022). https://doi.org:10.3390/vaccines10010101

167 Shimabukuro, T. T. *et al.* Preliminary Findings of mRNA Covid-19 Vaccine Safety in Pregnant Persons. *N. Engl. J. Med.* **384**, 2273-2282 (2021). https://doi.org:10.1056/NEJMoa2104983

168 Shook, L. L. *et al.* Durability of Anti-Spike Antibodies in Infants After Maternal COVID-19 Vaccination or Natural Infection. *JAMA* **327**, 1087-1089 (2022). https://doi.org:10.1001/jama.2022.1206

169 Simeone, R. M. *et al.* Effectiveness of Maternal mRNA COVID-19 Vaccination During Pregnancy Against COVID-19-Associated Hospitalizations in Infants Aged <6 Months During SARS-CoV-2 Omicron Predominance - 20 States, March 9, 2022-May 31, 2023. *MMWR - Morbidity & Mortality Weekly Report* **72**, 1057-1064 (2023). https://doi.org:10.15585/mmwr.mm7239a3

170 Sotoodeh Ghorbani, S. *et al.* Effectiveness, Immunogenicity and Safety of COVID-19 Vaccination in Pregnant Women: A Rapid Review Study. *Med. J. Islam. Repub. Iran* **37**, 72 (2023). https://doi.org:10.47176/mjiri.37.72

171 St Clair, L. A. *et al.* Reduced control of SARS-CoV-2 infection associates with lower mucosal antibody responses in pregnancy. *Msphere* **9**, e0081223 (2024). https://doi.org:10.1128/msphere.00812-23

172 Stock, S. *et al.* COVID-19 vaccination rates and SARS-CoV-2 infection in pregnant women in Scotland. *Research Square* (2021). https://doi.org:10.21203/rs.3.rs-1051010/v1

173 Strzelecka, I. *et al.* Fetal Cardiac Hemodynamic and Sonographic Anomalies in Maternal COVID-19 Infection Depending on Vaccination Status-Polish Multicenter Cohort Study. *Journal of Clinical Medicine* **12**, 09 (2023). https://doi.org:10.3390/jcm12165186

174 Subramaniam, V. *et al.* Outcomes of Pregnancy in COVID-19-Positive Mothers in a Tertiary Centre. *Life* **13**, 30 (2023). https://doi.org:10.3390/life13071491

175 Sunder, A. *et al.* COVID-19 vaccinations in pregnancy: Save mother and baby from COVID-19 pandemic. *Int. J. Gynaecol. Obstet.* **160**, 864-873 (2023). https://doi.org:10.1002/ijgo.14532

176 Sunder, A. *et al.* Maternal COVID-19 Disease and COVID-19 Immunization. *Cureus* **14**, e28328 (2022). https://doi.org:10.7759/cureus.28328

177 Sut, H. *et al.* Maternal and perinatal outcomes of COVID-19 vaccination during pregnancy. *Journal of the Turkishgerman Gynecological Association* **24**, 120-124 (2023). https://doi.org:10.4274/jtgga.galenos.2023.2022-9-10

178 Tavares Veras Florentino, P. *et al.* Safety of BNT162b2 and CoronaVac during pregnancy on birth outcomes and neonatal mortality: a cohort study from Brazil. *Int. J. Epidemiol.* **52**, 1708-1715 (2023). https://doi.org:10.1093/ije/dyad120

179 Theiler, R. N. *et al.* Pregnancy and birth outcomes after SARS-CoV-2 vaccination in pregnancy. *American Journal of Obstetrics & Gynecology MFM* **3**, 100467 (2021). https://doi.org:10.1016/j.ajogmf.2021.100467

180 Tormen, M. *et al.* Effectiveness and safety of COVID-19 vaccine in pregnant women: A systematic review with meta-analysis. *BJOG* **130**, 348-357 (2023). https://doi.org:10.1111/1471-0528.17354

181 Toussia-Cohen, S. *et al.* Maternal and Neonatal Immune Responses Following COVID-19 Infection and Vaccinations in Pregnancy. **10**, 26 (2022). https://doi.org:10.3390/vaccines10122019

182 Toussia-Cohen, S. *et al.* Early Adverse Events and Immune Response Following Second and Third COVID-19 Vaccination in Pregnancy. *Journal of Clinical Medicine* **11**, 12 (2022). https://doi.org:10.3390/jcm11164720

183 Tripathy, G. S. *et al.* Effects of Covid-19 Vaccination during Pregnancy on the Obstetric and Neonatal Outcomes in a Tertiary Health Care Center. *Journal of Mother and Child* **27**, 72-78 (2023). https://doi.org:10.34763/jmotherandchild.20232701.d-22-00043

184 Tsiorou, K. & Sarantaki, A. Risk Assessment of COVID-19 Vaccination Among Childbearing Women. *Maedica* **17**, 449-457 (2022). https://doi.org:10.26574/maedica.2022.17.2.449

185 Tudisco, R. *et al.* Impact of mRNA-based vaccines in the prevention of adverse outcomes of COVID-19 infection in pregnancy: a single-center cohort study. *Frontiers in Pediatrics* **11**, 1214768 (2023). https://doi.org:10.3389/fped.2023.1214768

186 Uta, M., Craina, M., Marc, F. & Enatescu, I. Assessing the Impact of COVID-19 Vaccination on Preterm Birth: A Systematic Review with Meta-Analysis. **12**, 19 (2024). https://doi.org:10.3390/vaccines12010102

187 Vazquez-Benitez, G. *et al.* COVID-19 Vaccine Safety Surveillance in Early Pregnancy in the United States: Design Factors Affecting the Association Between Vaccine and Spontaneous Abortion. *Am. J. Epidemiol.* **192**, 1386-1395 (2023). https://doi.org:10.1093/aje/kwad059

188 Velez, M. P., Fell, D. B., Shellenberger, J. P., Kwong, J. C. & Ray, J. G. Miscarriage after SARS-CoV-2 vaccination: A population-based cohort study. *BJOG* **131**, 415-422 (2024). https://doi.org:10.1111/1471-0528.17721

189 Vetter-Laracy, S. *et al.* Neonatal SARS-CoV-2 immunoglobulin G antibodies at delivery and their impact on COVID-19. *Eur. J. Clin. Microbiol. Infect. Dis.* **43**, 693-702 (2024). https://doi.org:10.1007/s10096-024-04773-3

190 Villar, J. *et al.* Pregnancy outcomes and vaccine effectiveness during the period of omicron as the variant of concern, INTERCOVID-2022: a multinational, observational study. *Lancet* **401**, 447-457 (2023). https://doi.org:10.1016/S0140-6736(22)02467-9

191 Voiniusyte, A., Cerniauskaite, M., Paliulyte, V., Einikyte, R. & Ramasauskaite, D. Vaccination Against COVID-19 Disease During Pregnancy. *Acta Medica Lituanica* **29**, 51-57 (2022). https://doi.org:10.15388/Amed.2021.29.1.11

192 Wainstock, T., Yoles, I., Sergienko, R. & Sheiner, E. Prenatal maternal COVID-19 vaccination and pregnancy outcomes. *Vaccine* **39**, 6037-6040 (2021). https://doi.org:10.1016/j.vaccine.2021.09.012

193 Wang, J., Deng, Y. & Wang, W. COVID-19 vaccination during pregnancy and adverse perinatal outcomes: a systematic review and meta-analysis. *Trans. R. Soc. Trop. Med. Hyg.* **31**, 31 (2024). https://doi.org:10.1093/trstmh/trad093

194 Watanabe, A. *et al.* Peripartum Outcomes Associated With COVID-19 Vaccination During Pregnancy: A Systematic Review and Meta-analysis. *JAMA Pediatrics* **03**, 03 (2022). https://doi.org:10.1001/jamapediatrics.2022.3456

195 Woestenberg, P. J. *et al.* Maternal first trimester COVID-19 vaccination and risk of major non-genetic congenital anomalies. *Birth Defects Research* **115**, 1746-1757 (2023). https://doi.org:10.1002/bdr2.2251

196 Wu, S. *et al.* The dose- and time-dependent effectiveness and safety associated with COVID-19 vaccination during pregnancy: a systematic review and meta-analysis. *Int. J. Infect. Dis.* **128**, 335-346 (2023). https://doi.org:10.1016/j.ijid.2023.01.018

197 Yang, Y. J. *et al.* Association of Gestational Age at Coronavirus Disease 2019 (COVID-19) Vaccination, History of Severe Acute Respiratory Syndrome Coronavirus 2 (SARS-CoV-2) Infection, and a Vaccine Booster Dose With Maternal and Umbilical Cord Antibody Levels at Delivery. *Obstet. Gynecol.* **139**, 373-380 (2022). https://doi.org:10.1097/AOG.0000000000004693

198 Zare Sakhvidi, M. *et al.* COVID-19 vaccine in pregnant women and pregnancy outcomes: A historical cohort in center of Iran. *Womens Health* **19**, 17455057231189554 (2023). https://doi.org:10.1177/17455057231189554

199 Zerbo, O. *et al.* Maternal SARS-CoV-2 vaccination and infant protection against SARS-CoV-2 during the first six months of life. *Nature communications* **14**, 894 (2023). https://doi.org:10.1038/s41467-023-36547-4

200 Zerbo, O. *et al.* Effectiveness of COVID-19 vaccination during pregnancy by circulating viral variant. *AJOG Global Reports* **3**, 100264 (2023). https://doi.org:10.1016/j.xagr.2023.100264

201 Zhang, D. *et al.* Systematic review and meta-analysis of neonatal outcomes of COVID-19 vaccination in pregnancy. *Pediatr. Res.* **94**, 34-42 (2023). https://doi.org:10.1038/s41390-022-02421-0

202 Zhong, J. *et al.* Effectiveness of Maternal Inactivated COVID-19 Vaccination against Omicron Infection in Infants during the First 12 Months of Life: A Test-Negative Case-Control Study. **11**, 22 (2023). https://doi.org:10.3390/vaccines11091402

203 Leung, H. H. Y. *et al.* A Registry-Based Observational Study on the Maternal and Fetal Outcomes of COVID-19 Patients in Hong Kong. *Maternal-Fetal Med.* **6**, 156-163 (2024). https://doi.org:10.1097/FM9.0000000000000234

204 Ciapponi, A. *et al.* Safety and Effectiveness of COVID-19 Vaccines During Pregnancy: A Living Systematic Review and Meta-analysis. *Drug Saf.* **47**, 991-1010 (2024). https://doi.org:10.1007/s40264-024-01458-w

205 De Virgilio Suglia, C. *et al.* Efficacy of vaccination during pregnancy in reducing the risk of SARS-CoV-2 infection in infants younger than 12 months. Puglia (Italy), 2021–23. *Hum. Vaccin. Immunother.* **20**, 2403831 (2024). https://doi.org:10.1080/21645515.2024.2403831

206 Mohammadi, S. *et al.* COVID-19 vaccine safety studies among special populations: A systematic review and meta-analysis of 120 observational studies and randomized clinical trials. *Vaccine* **61**, 127342 (2025). https://doi.org:10.1016/j.vaccine.2025.127342

207 Ni, J., Zheng, Y., Tian, J., Zhang, L. & Duan, S. Risk of neonatal SARS-CoV-2 infection: a retrospective cohort study based on infected mothers with gestational diabetes mellitus. *Front. Endocrinol. (Lausanne)* **16**, 1483962 (2025). https://doi.org:10.3389/fendo.2025.1483962

208 Shahraki-Sanavi, F. *et al.* Evaluating miscarriage incidence after COVID-19 vaccination. *Sci. Rep.* **15**, 20387 (2025). https://doi.org:10.1038/s41598-025-06904-y

209 Strathmann, E. A. *et al.* Vaccine Effectiveness in SARS-CoV-2-Infected Pregnant Women with Gestational Diabetes Mellitus: Results from a Multicenter Registry-Based Prospective Cohort Study in Germany. *Geburtshilfe Frauenheilkd.* **85**, 1090-1102 (2025). https://doi.org:10.1055/a-2576-6293

210 Svirsky, R. *et al.* Vaccination in twin pregnancies: comparison between immunization before conception and during pregnancy. *Sci. Rep.* **14**, 10813 (2024). https://doi.org:10.1038/s41598-024-61504-6

211 Wagner, S. B. *et al.* SARS-CoV-2 breakthrough infection during pregnancy preferentially elicits IgG4 response and enhanced placental-transfer. *Vaccine* **62**, 127476 (2025). https://doi.org:10.1016/j.vaccine.2025.127476

212 Woestenberg, P. J. *et al.* The association between coronavirus disease 2019 vaccination during pregnancy and neonatal health outcomes. *Pediatric investigation* **9**, 41-51 (2025). https://doi.org:10.1002/ped4.12456

213 Farias, M. M., Camacho, E. E. V., de los Angeles Flores Manzur, M., Sanabria, L. S. & Borboa-Olivares, H. J. Identification of the "Spike" protein in umbilical cord blood of newborns from mothers vaccinated against SARS-CoV-2 during pregnancy. *Ginecol. Obstet. Mex.* **92**, 189-197 (2024). https://doi.org:10.24245/gom.v92i5.9201

214 Karkin, P. O. & Sezer, G. Association between COVID-19 vaccination during pregnancy and SGA in a rural area. *J. Exp. Clin. Med.* **41**, 515-518 (2024). https://doi.org:10.52142/omujecm.41.3.12

215 Kayser, A. *et al.* First trimester mRNA COVID-19 vaccination and risk of congenital malformation: a prospective observational embryotox cohort study. *Clinical microbiology and infection : the official publication of the European Society of Clinical Microbiology and Infectious Diseases* (2025). https://doi.org:10.1016/j.cmi.2025.06.005

216 Gandhi, A. P. *et al.* Effect of the COVID-19 vaccination on feto-maternal outcomeA prospective cohort study among Indian pregnant women. *The Indian journal of medical research* **160**, 371-378 (2024). https://doi.org:10.25259/IJMR_1014_2024

217 Avrich Ciesla, A. *et al.* Effectiveness of the Original Monovalent and Bivalent COVID-19 Vaccines Against COVID-19-Associated Emergency Department and Urgent Care Encounters in Pregnant Persons Who Were Not Immunocompromised: VISION Network, June 2022-August 2023. *Open forum infectious diseases* **11**, ofae481 (2024). https://doi.org:10.1093/ofid/ofae481

218 Bernard, C. *et al.* First-Trimester mRNA COVID-19 Vaccination and Risk of Major Congenital Anomalies. *JAMA Network Open* **8**, e2538039 (2025). https://doi.org:https://dx.doi.org/10.1001/jamanetworkopen.2025.38039

219 da Silva, M. C. *et al.* Autoantibody production in pregnancy: relationship with mRNA BNT162b2 immunization, active COVID-19, and pre-eclampsia. *Front. Immunol.* **16** (2025). https://doi.org:10.3389/fimmu.2025.1613088

220 Deese, J. *et al.* Systematic Literature Review of Maternal Antibodies in Human Milk Following Vaccination During Pregnancy or Lactation Tetanus, Pertussis, Influenza and COVID-19. *The Pediatric infectious disease journal* **44**, S38-S42 (2025). https://doi.org:10.1097/INF.0000000000004634

221 Gandhi, A. P. *et al.* Safety of COVID-19 Vaccines Among Pregnant Women in India: A Systematic Review and Meta-Analysis. *Cureus* **17**, e86115 (2025). https://doi.org:10.7759/cureus.86115

222 Jeon, B. *et al.* Association of COVID-19 Vaccination Status With Hospitalization and Illness Severity Among Pregnant Women: A Nationwide Population-Based Study in South Korea. *Health Security* **23**, 261-269 (2025). https://doi.org:https://dx.doi.org/10.1089/hs.2024.0141

223 Korchinski, I. *et al.* Maternal-infant transfer of SARS-CoV-2 antibodies following vaccination in pregnancy: A prospective cohort study. *Vaccine* **42** (2024). https://doi.org:10.1016/j.vaccine.2024.07.024

224 Munoz, F. M. *et al.* Infant Antibodies After Maternal COVID-19 Vaccination During Pregnancy or Postpartum. *Pediatrics* **156**, 1-14 (2025). https://doi.org:10.1542/peds.2024-070175

225 Oliveira, J. A., da Silva, E. G., Karasu, A. F. G., Silva, A. M. N. & Philip, C. E. Neonatal and maternal outcomes of mRNA versus Non-mRNA COVID-19 vaccines in pregnant patients: a systematic review and meta-analysis. *Revista brasileira de ginecologia e obstetricia : revista da Federacao Brasileira das Sociedades de Ginecologia e Obstetricia* **46**, e-e (2024). https://doi.org:10.61622/rbgo/2024rbgo69

226 Quijada-Cazorla, M. A., Simó-Rodríguez, M. V., Palacios-Marqués, A. M., Peláez-García, M. & Ramos-Rincón, J. M. Impact of COVID-19 on Pregnancy Outcomes: A Phase-Based Analysis from a Spanish Tertiary Hospital (2020-2023). *Journal of clinical medicine* **14** (2025). https://doi.org:10.3390/jcm14145136

227 Rojas, G. *et al.* Concordance of maternal and cord blood SARS-COV-2 immunoglobulin seropositivity after COVID-19 infection or vaccination in pregnancy. *J. Neonatal Perinatal Med.* **18**, 9-17 (2025). https://doi.org:https://dx.doi.org/10.1177/19345798251315385

228 Rowe, S. L. *et al.* Adverse events associated with COVID-19 vaccination or diagnosis among pregnant and non-pregnant women in the United States, 2021-2022. *Int. J. Infect. Dis.* **160** (2025). https://doi.org:10.1016/j.ijid.2025.108050

229 Rowe, S. L. *et al.* COVID-19 Vaccination During Pregnancy and Major Structural Birth Defects. *Pediatrics* **155** (2025). https://doi.org:10.1542/peds.2024-069778

230 Sharma, A. J. *et al.* COVID-19 Vaccination During Pregnancy and Birth Defects: Results From the CDC COVID-19 Vaccine Pregnancy Registry, United States 2021–2022. *Birth defects research* **117**, e2474 (2025). https://doi.org:10.1002/bdr2.2474

231 Wong, J. *et al.* Implementation and Results of Active Vaccine Safety Monitoring During the COVID-19 Pandemic in the UK: A Regulatory Perspective. *Drug Saf.* (2025). https://doi.org:10.1007/s40264-025-01579-w

232 Huiberts, A. J. *et al.* The effect of SARS-CoV-2 infection and COVID-19 vaccination during pregnancy on neonatal outcomes. *Epidemiol. Infect.* **153** (2024). https://doi.org:10.1017/S0950268824001766

233 Favre, G. *et al.* Neurodevelopmental outcomes of infants after in utero exposure to SARS-CoV-2 or mRNA-COVID-19 vaccine compared with unexposed infants: a COVI-PREG prospective cohort study. *Clinical microbiology and infection : the official publication of the European Society of Clinical Microbiology and Infectious Diseases* **31**, 266-273 (2024). https://doi.org:10.1016/j.cmi.2024.10.019

234 Ohta, M. *et al.* Possible rapid reduction of anti‐RBD antibody titre after SARS‐CoV‐2 mRNA vaccination in pregnant women: Multicentre prospective study. *The journal of obstetrics and gynaecology research* **51**, 1-8 (2024). https://doi.org:10.1111/jog.16150

235 Chittajallu, L. V. S., Kaku, R., Kondadasula, P., Lim, J. Y. & Zhumabekova, A. Safety and Efficacy of Vaccines During Pregnancy: A Systematic Review. *Cureus* **17**, e77176 (2025). https://doi.org:10.7759/cureus.77176

236 Daouk, S. *et al.* Association Between Severity of COVID-19 and Social Determinants of Health with Adverse Pregnancy Outcomes in a Study of Mother-Infant Pairs in Los Angeles, California. *Women (Basel, Switzerland)* **5** (2025). https://doi.org:10.3390/women5020012

237 Dutta, I. & Bharti, A. Adverse Effects Following Covishield and Covaxin Vaccination in Pregnant and Non-pregnant Women: A Comparative Study From Ranchi, Jharkhand. *Cureus* **17**, e84112 (2025). https://doi.org:10.7759/cureus.84112

238 Hamouda, N. I., Amin, A. M., Hasan, M. T. & Baghagho, E. Persistence of COVID-19 Human Milk Antibodies After Maternal COVID-19 Vaccination: Systematic Review and Meta-Regression Analysis. *Cureus* **16**, e59500 (2024). https://doi.org:10.7759/cureus.59500

239 Hernandez, C. J. *et al.* The Benefits of COVID-19 Vaccination for Pregnant Patients Hospitalized with Respiratory Symptoms: A Retrospective Cohort Study in South Brazil. *Vaccines* **12** (2024). https://doi.org:10.3390/vaccines12121445

240 Jorgensen, S. C. J. *et al.* Association between maternal mRNA covid-19 vaccination in early pregnancy and major congenital anomalies in offspring: population based cohort study with sibling matched analysis. *BMJ medicine* **3**, e000743 (2024). https://doi.org:10.1136/bmjmed-2023-000743

241 Kim, K. *et al.* Maternal Exposures to COVID-19 Vaccine and Adverse Birth Outcomes: National Population Study in Korea. *J. Korean Med. Sci.* **40**, e63 (2025). https://doi.org:10.3346/jkms.2025.40.e63

242 Magnus, M. C. *et al.* Covid-19 infection and vaccination during first trimester and risk of congenital anomalies: Nordic registry based study. *BMJ (Clinical research ed.)* **386**, e079364 (2024). https://doi.org:10.1136/bmj-2024-079364

243 Mand, N. *et al.* Influence of SARS-CoV-2 variants of concern and maternal vaccination status on neonatal outcome. *BMJ paediatrics open* **9** (2025). https://doi.org:10.1136/bmjpo-2024-003109

244 Matsunashi, S. *et al.* Rate of vertical transmission of coronavirus disease 2019 and effect of maternal vaccination: A prospective cohort study. *Pediatrics international : official journal of the Japan Pediatric Society* **67**, e15892 (2025). https://doi.org:10.1111/ped.15892

245 Sánchez-Salguero, E. S. *et al.* Maternal obesity associates with altered humoral immunity in blood and colostrum. *Mucosal Immunol.* **18**, 491-499 (2025). https://doi.org:10.1016/j.mucimm.2025.01.007

246 Sgayer, I. *et al.* Maternal-Fetal Transfer of Anti-SARS-CoV-2 Antibodies in Amniotic Fluid: Insights from Maternal Vaccination and COVID-19 Infection. *Journal of Clinical Medicine* **13**, 25 (2024). https://doi.org:https://dx.doi.org/10.3390/jcm13175023

247 Tamir-Hostovsky, L. *et al.* Association of BNT162b2 SARS-CoV-2 vaccination during pregnancy with postnatal outcomes in premature infants. *Acta Paediatrica, International Journal of Paediatrics* **113**, 2275-2281 (2024). https://doi.org:10.1111/apa.17329

248 Zhang, M., Wu, S. & Wang, D. Obstetric outcomes of women vaccinated with the COVID-19 vaccine (≥1 dose) A single-center retrospective cohort study of pregnant Chinese women. *Medicine* **103**, e39053 (2024). https://doi.org:10.1097/MD.0000000000039053

249 Cavalcante, L. R. L. *et al.* Maternal Immunization Against SARS-CoV-2 and Infant Immunity Persistence in a Brazilian Cohort. *The Pediatric infectious disease journal* **44**, e242-e246 (2025). https://doi.org:10.1097/INF.0000000000004817

250 Choi, Y. J. *et al.* The risk of pregnancy-related adverse outcomes after COVID-19 vaccination: Propensity score-matched analysis with influenza vaccination. *Vaccine* **44**, 126506 (2024). https://doi.org:10.1016/j.vaccine.2024.126506

251 Gholami, Z., Mohseni, M. & Nasab, P. A. Comparing the maternal and neonatal outcomes in vaccinated and unvaccinated pregnant women against COVID-19: a retrospective cohort study. *BMC Pregnancy Childbirth* **25**, 367 (2025). https://doi.org:10.1186/s12884-025-07462-x

252 Pecks, U. *et al.* SARS-CoV-2 infection in pregnant women and incidence of thromboembolic disease: an analysis of the Covid-19-Related Obstetric and Neonatal Outcome Study (CRONOS) in Germany. *Arch. Gynecol. Obstet.* **311**, 1667-1682 (2025). https://doi.org:10.1007/s00404-025-08007-5

253 Rodríguez-Blanco, N. *et al.* The impact of SARS-CoV-2 infection on vaccinated versus unvaccinated pregnant women: a retrospective cohort study. *BMC Pregnancy Childbirth* **25**, 519 (2025). https://doi.org:10.1186/s12884-025-07630-z

254 Sheth, S. S. *et al.* Coronavirus Disease 2019 (COVID-19) Vaccination and Spontaneous Abortion. *Obstet. Gynecol.* **145**, 129-137 (2025). https://doi.org:10.1097/AOG.0000000000005904

255 Stracuzzi, M. *et al.* Short-lived neutralizing activity against SARS-CoV-2 in newborns of immunized mothers. *Pediatric allergy and immunology : official publication of the European Society of Pediatric Allergy and Immunology* **36**, e70084 (2025). https://doi.org:10.1111/pai.70084

256 Sturrock, S. *et al.* Maternal and Placental Antibody Responses in SARS-CoV-2 Vaccination and Natural Infection During Pregnancy. *The Pediatric infectious disease journal* **44**, S32-S37 (2025). https://doi.org:10.1097/INF.0000000000004704

257 Figueroa-Romero, A. *et al.* SARS-CoV-2 seroprevalence among Beninese pregnant women in the third year of the pandemic. *BMC Public Health* **24**, 1762 (2024). https://doi.org:10.1186/s12889-024-19087-4

258 Kong, C. W. & To, W. W. K. Pregnancy and perinatal outcomes of women with SARS-CoV-2 infection during pregnancy. *Singapore Med. J.* (2024). https://doi.org:10.4103/singaporemedj.SMJ-2023-083

259 Mahyuddin, A. P. *et al.* COVID-19 vaccination before or during pregnancy results in high, sustained maternal neutralizing activity to SARS-CoV-2 wild-type and Delta/Omicron variants of concern, particularly following a booster dose or infection. *International journal of infectious diseases : IJID : official publication of the International Society for Infectious Diseases* **146**, 107121 (2024). https://doi.org:10.1016/j.ijid.2024.107121

260 Márquez, A. C. *et al.* COVID-19 serological survey utilizing antenatal serum samples in British Columbia. *Vaccine* **61**, 127310 (2025). https://doi.org:10.1016/j.vaccine.2025.127310

261 Roque-Pereira, L. *et al.* Comparison of Adverse Events in Pregnant Persons Receiving COVID-19 and Influenza Vaccines: A Disproportionality Analysis Using Combined Data from US VAERS and EudraVigilance Spontaneous Report Databases. *Drug Saf.* **48**, 1127-1139 (2025). https://doi.org:10.1007/s40264-025-01561-6

262 Zhu, X. D. *et al.* Association of maternal infection of SARS-CoV-2 and neonatal susceptibility: A retrospective cohort study. *Vaccine X* **20**, 100536 (2024). https://doi.org:10.1016/j.jvacx.2024.100536

263 Alamoudi, R. A. *et al.* COVID-19 vaccine and non-syndromic orofacial clefts in five arab countries. A case-control study. *Clin. Oral Investig.* **28**, 357 (2024). https://doi.org:10.1007/s00784-024-05744-w

264 Chen, W. C. *et al.* Evaluating TRAIL and IP-10 alterations in vaccinated pregnant women after COVID-19 diagnosis and their correlation with neutralizing antibodies. *Front. Immunol.* **15**, 1415561 (2024). https://doi.org:10.3389/fimmu.2024.1415561

265 Hall, C. *et al.* COVID-19 vaccine initiation in pregnancy and risk for adverse neonatal outcomes among United States military service members, January–December 2021. *Vaccine* **51**, 126894 (2025). https://doi.org:10.1016/j.vaccine.2025.126894

266 Hemati, Z. *et al.* Comparing the immunogenicity of COVID-19 infection and vaccination in pregnant women as measured by anti-S IgG. *BMC Infect. Dis.* **24**, 935 (2024). https://doi.org:10.1186/s12879-024-09853-5

267 Kharbanda, E. O. *et al.* COVID-19 Vaccination in the First Trimester and Major Structural Birth Defects among Live Births. *JAMA pediatrics* **178**, 823-829 (2024). https://doi.org:10.1001/jamapediatrics.2024.1917

268 Masry, A. *et al.* Impact of pregnant mothers' previous COVID-19 infection and vaccination on newborns' serological profiling. *Front. Immunol.* **16**, 1526264 (2025). https://doi.org:10.3389/fimmu.2025.1526264

269 Mata-Miranda, M. M. *et al.* Analysis of the immune response using FTIR spectroscopy in mothers and their newborns with different vaccination schemes for COVID-19. *Sci. Rep.* **14**, 17308 (2024). https://doi.org:10.1038/s41598-024-68340-8

270 Munoz, F. M. *et al.* Enhanced D614G and Omicron Variants Antibody Persistence in Infants at 2 Months of Age Following Maternal mRNA Booster Vaccination During Pregnancy or Postpartum. *Pediatr. Infect. Dis. J.* **43**, 1065-1073 (2024). https://doi.org:10.1097/INF.0000000000004510

271 Partey, F. D. *et al.* Efficient transplacental transfer of SARS-CoV-2 antibodies between naturally exposed mothers and infants in Accra, Ghana. *Sci. Rep.* **14**, 10772 (2024). https://doi.org:10.1038/s41598-024-61496-3

272 Regan, A. K. *et al.* COVID‐19 vaccination around the time of conception and risk of placenta‐mediated adverse pregnancy outcomes. *Acta Obstet. Gynecol. Scand.* **104**, 1883-1896 (2025). https://doi.org:10.1111/aogs.70025

273 Vatanparast, A., Daghigh, F. & Akbari, H. Sinopharm COVID-19 Vaccination during Pregnancy Triggers Thyroid Stimulating Hormone Levels in Newborns. *Am. J. Perinatol.* **42**, 1647-1653 (2025). https://doi.org:10.1055/a-2526-5326

274 Yeniocak, A. S., Tercan, C., Dagdeviren, E., Arabaci, O. & Arabaci, E. E. G. Impact of SARS-CoV-2 infection and vaccination on cesarean section outcomes: a retrospective analysis. *Ann. Saudi Med.* **44**, 306-318 (2024). https://doi.org:10.5144/0256-4947.2024.306

275 Verma, S. *et al.* SARS-CoV-2 antibodies in breast milk of women given one & two doses of COVID-19 vaccine. *Indian J. Med. Res.* **160**, 501-505 (2024). https://doi.org:10.25259/ijmr_964_23

276 Mardiyan Kurniawati, E. & Rahmawati, N. A. Records of antibodies in breast milk in postpartum women who have been vaccinated or exposed to COVID-19: A systematic review. *F1000Research* **11**, 785 (2022). https://doi.org:https://dx.doi.org/10.12688/f1000research.122237.4

277 Denoble, A. E. *et al.* Coronavirus Disease 2019 (COVID-19) Vaccination and Stillbirth in the Vaccine Safety Datalink. *Obstet. Gynecol.* **144**, 215-222 (2024). https://doi.org:10.1097/AOG.0000000000005632

278 Hardie, I. *et al.* Early childhood developmental concerns following SARS-CoV-2 infection and COVID-19 vaccination during pregnancy: a Scottish population-level retrospective cohort study. *The Lancet. Child & adolescent health* **9**, 162-171 (2025). https://doi.org:10.1016/S2352-4642(25)00008-2

279 Malamule, M. M., Gundo, R. & Mulaudzi, M. The effect of coronavirus disease 2019 vaccination on pregnant women: A scoping review. *Health SA = SA Gesondheid* **29**, 2577 (2024). https://doi.org:10.4102/hsag.v29i0.2577

280 Vesco, K. K. *et al.* Obstetric Complications and Birth Outcomes After Antenatal Coronavirus Disease 2019 (COVID-19) Vaccination. *Obstet. Gynecol.* **143**, 794-802 (2024). https://doi.org:10.1097/AOG.0000000000005583

281 Accrombessi, M. *et al.* Previous or current infection with SARS-CoV-2 virus and its impact on maternal and neonatal health outcomes in Benin: a sero-epidemiological study in pregnant women. *Archives of public health = Archives belges de sante publique* **83**, 143 (2025). https://doi.org:10.1186/s13690-025-01633-0

282 Amer, A. A. *et al.* Exploring COVID-19 vaccine adverse events among pregnant women: a cross-sectional study, 2022. *Therapeutic advances in vaccines and immunotherapy* **12**, 25151355241285594 (2024). https://doi.org:10.1177/25151355241285594

283 Ihenetu, G. *et al.* Uptake of COVID-19 vaccines and association with hospitalisation due to COVID-19 in pregnancy: Retrospective cohort study. *Vaccine* **42**, 126214 (2024). https://doi.org:10.1016/j.vaccine.2024.126214

284 Jarlhelt, I. *et al.* SARS-CoV-2 anti-RBD and anti-N protein responses are differentially regulated between mother-child pairs: insight from a national study cohort at the Faroe Islands. *Front. Immunol.* **15**, 1418678 (2024). https://doi.org:10.3389/fimmu.2024.1418678

285 Lei, Z. J., Bai, M. X., Li, M. J., Jin, P. & Ding, Y. B. The Effectiveness and Influence of COVID-19 Vaccination on Perinatal Individuals and Their Newborns: An Updated Meta-Analysis. *The Canadian journal of infectious diseases & medical microbiology = Journal canadien des maladies infectieuses et de la microbiologie medicale* **2025**, 6115890 (2025). https://doi.org:10.1155/cjid/6115890

286 Santos, J., Miller, M., Branda, M. E., Mehta, R. A. & Theiler, R. N. Maternal COVID-19 vaccination status and association with neonatal congenital anomalies. *Frontiers in pediatrics* **12**, 1355502 (2024). https://doi.org:10.3389/fped.2024.1355502

287 Amaya, G., Santoro, A., García, C. & Alonso, B. COVID vaccination in pregnancy: how did it impact maternal infection, obstetric-neonatal outcomes, and the first 6 months of the infants' lives? *Arch. pediatr. Urug* **96**, e502-e502 (2025). https://doi.org:10.31134/ap.96.s1.1

288 Azevedo, F. M. *et al.* Comorbidities and Sociodemographic Factors as Determinants of COVID-19 Outcome in Hospitalized Pregnant Women in Brazil. *Arch. Med. Res.* **56**, 103184 (2025). https://doi.org:10.1016/j.arcmed.2025.103184

289 Bentes, A. A. *et al.* Factors modulating maternofetal transfer of IgG antibodies following SARS-CoV-2 gestational infection. *Rev. Inst. Med. Trop. São Paulo (Online)* **67**, e29-e29 (2025). https://doi.org:10.1590/s1678-9946202567029

290 Brendolin, M. *et al.* SARS-CoV-2 Infection and Adverse Maternal and Perinatal Outcomes: Time-to-Event Analysis of a Hospital-Based Cohort Study of Pregnant Women in Rio de Janeiro, Brazil. *Viruses* **17** (2025). https://doi.org:10.3390/v17020207

291 Carvalho-Sauer, R., Costa, M., Flores-Ortiz, R., Teixeira, M. G. & Paixao, E. S. Case Fatality Rate and Determinants of Maternal Death among Pregnant Women with SARS-CoV-2 Infection: A Population-Based Cohort Study in Bahia, Brazil. *International journal of infectious diseases : IJID : official publication of the International Society for Infectious Diseases*, 108144 (2025). https://doi.org:10.1016/j.ijid.2025.108144

292 Devi, E. P. & Sukanya, R. MATERNAL AND PERINATAL OUTCOMES OF NOVEL CORONAVIRUS 19 IN PREGNANCY IN A TERTIARY CARE CENTRE – A PROSPECTIVE OBSERVATIONAL STUDY. *Int. J. Med. Public Health* **15**, 1155-1160 (2025). https://doi.org:10.70034/ijmedph.2025.1.217

293 Günther, J. *et al.* Variability in COVID-19 symptom presentation during pregnancy and its impact on maternal and infant outcomes across the pandemic. *International journal of infectious diseases : IJID : official publication of the International Society for Infectious Diseases* **146**, 107157 (2024). https://doi.org:10.1016/j.ijid.2024.107157

294 Hochmayr, C. *et al.* Factors Influencing Breast Milk Antibody Titers during the Coronavirus Disease 2019 Pandemic: An Observational Study. *Nutrients* **16** (2024). https://doi.org:10.3390/nu16142320

295 Jindal, M., Kohlii, B., Minhas, S., Faujdar, S. S. & Mehrishi, P. Impact of Antenatal Covid-19 Vaccination on Mother and Foetus-A Prospective Study in Rural Medical College in Himachal Pradesh. *Afr. J. Biol. Sci.* **6**, 2233-2240 (2024). https://doi.org:10.48047/AFJBS.6.7.2024.2233-2240

296 Kily, L. J. M. *et al.* Outcomes of pregnant ICU patients with severe COVID-19 pneumonia in Qatar during the three waves of the COVID-19 pandemic: A retrospective cohort study. *Qatar Med. J.* **2025**, 12 (2025). https://doi.org:10.5339/qmj.2025.12

297 Movahedi, S., Abbaszadeh, N., Ghalenoee, Z., Ebrahimi, E. & Ebrahimi, E. Evaluating the Newborn-Related Outcomes of Pregnancy After COVID-19 Sinopharm Vaccination. *Arch. Pediatr. Infect. Dis.* **13** (2025). https://doi.org:10.5812/apid-154370

298 Ray, C. M., II, Belle, M. R. & Nathalie-Anne, R. H. The Coronavirus Disease 2019 (COVID-19) Immunoglobulin (IgG) Levels Using Chemiluminescence Immunoassay (CLIA) Anti-S-RBD Test in term neonates born to COVID-19 fully vaccinated mothers. *Pediatric Infectious Disease Society of the Philippines Journal*, 3-12 (2023).

299 Li, L. *et al.* Neutralizing and binding antibody responses to SARS-CoV-2 with hybrid immunity in pregnancy. *npj Vaccines* **9** (2024). https://doi.org:10.1038/s41541-024-00948-3

300 Simanjuntak, L. Covid-19 vaccination in pregnancy and placental pathology. *Asian Pacific Journal of Reproduction* **13**, 76-79 (2024). https://doi.org:10.4103/apjr.apjr_94_23

301 de Feijter, M., Vissers, L. C. M., Davidson, L., Kant, A. C. & Woestenberg, P. J. The risk of preterm labor after COVID-19 vaccination before and during pregnancy. *Frontiers in Drug Safety and Regulation* **3**, 1235051 (2023). https://doi.org:https://dx.doi.org/10.3389/fdsfr.2023.1235051

302 Luxi, N. *et al.* Cohort event monitoring of safety of COVID-19 vaccines: the Italian experience of the "ilmiovaccinoCOVID19 collaborating group". *Frontiers in Drug Safety and Regulation* **4**, 1363086 (2024). https://doi.org:https://dx.doi.org/10.3389/fdsfr.2024.1363086

303 Mercade-Besora, N. *et al.* Effectiveness of COVID-19 mRNA primary and booster vaccination against infection and hospitalisation during pregnancy: a target trial emulation and meta-analysis of data from 4 European countries. *medRxiv* (2025). https://doi.org:10.1101/2025.05.16.25327593

304 Zidan, M. *et al.* BNT162b2 mRNA COVID-19 vaccine effectiveness in pregnancy: Emulating trial NCT04754594 using observational data from Norwegian health registries. *Vaccine* **68**, 127908 (2025). https://doi.org:https://doi.org/10.1016/j.vaccine.2025.127908

}

## Supplementary information 3: List of ongoing studies

| ***COVID-19*** | | | | | |
| --- | --- | --- | --- | --- | --- |
| **NCT number** | **Study design and phase** | **Intervention and comparison** | **Outcomes** | **Status** | **Estimated completion date** |
| EUPAS43556  NCT05126992 | Controlled cohort study  NA | G1: AZD1222  G2: mRNA COVID-19 vaccine G3: historical cohort | Maternal safety | Ongoing | 31 December 2024 |
| CTRI/2022/10/046842 | Controlled cohort study  NA | G1: COVID-19 vaccine  G2: no vaccine | Maternal vaccine efficacy  Maternal and infant safety | Not yet recruiting | NR |
| NCT04754594 | RCT  Phase 3 | G1: BNT162b2 vaccine  G2: placebo | Maternal efficacy  Maternal safety  Maternal and infant immunogenicity | Completed | 15 July 2022 |
| NCT05543993 | Controlled cohort study  NA | G1: mRNA bivalent COVID-19 booster during pregnancy  G2: mRNA bivalent COVID-19 booster during breastfeeding | Maternal and infant immunogenicity | Active, recruiting | 1 March 2025 |
| NCT04705116 | Controlled cohort study  NA | G1: COVID-19 vaccine  G2: no vaccine | Maternal and infant safety | Active, recruiting | 31 December 2026 |
| NCT0636927 | Controlled cohort study  NA | G1: Spikevax  G2: No vaccination  G3: COVID-19 infection | Harms maternal health  Harms infant health | Completed | 20 October 2023 |
| NCT06503900 | RCT  Phase 4 | G1: Simultaenous mRNA COVID-19 vaccine + IIV4 (quadrivalent inactivated influenza vaccine)  G2: Sequential mRNA COVID-19 vaccine + IIV4 (quadrivalent inactivated influenza vaccine) | Harms maternal health  Harms infant health | Acitve, not recruiting | December 2025 |
| ***Influenza*** | | | | | |
| NCT05457894 | RCT  Phase 3 | G1: Flu-M, Inactivated split influenza vaccine during 2ndtrimester of pregnancy  G2: Ultrix®, Inactivated split influenza vaccine during 2ndtrimester of pregnancy  G3: Flu-M, Inactivated split influenza vaccine during 3rd trimester of pregnancy  G4: Ultrix®, Inactivated split influenza vaccine during 3rd trimester of pregnancy | Immunogenicity–mother  Maternal safety | Completed | 11 March 2021 |
| NCT04460781 | Controlled cohort | G1: Flublok Quadrivalent influenza vaccine RIV4  G2: Standard-dose quadrivalent inactivated influenza vaccine SD-IIV4 | Maternal safety  Infant safety | Completed | 28 February 2022 |
| NCT04579822 | Controlled cohort | G1: QIV vaccine  G2: no vaccine | Maternal safety  Infant safety | Unknown | 31 December 2021 |
| NCT06286488 | Controlled cohort  Phase 4 | G1: influenza vaccine  G2: QIV | Immunogenicity–mother  Maternal safety | Active, not recruiting | 1 May 2026 |
| NCT07211152 | RCT  Phase 3 | G1: Sinovac QIV  G2: Vaxigrip QIV | Harms maternal health  Harms infant health  Immonogenicity mother  Immunogenicity child | Not yet recruiting | June 2026 |
| CTRI/2024/12/078484 | RCT  Phase 4 | G1: IIV4 (quadrivalent inactivated influenza vaccine)  G2: No vaccination | Harms maternal health  Harms infant health | Not yet recruiting | Unknown |
| ***Pertussis*** | | | | | |
| EUCTR2021-005194-77-BE | Controlled cohort | Tdap vaccination during different time points | Immunogenicity–mother | Ongoing | unknown |
| EUCTR2022-002697-80-BE | Controlled cohort | G1: vaccinated pregnant participants  G2: unvaccinated pregnant participants | Immunogenicity–infant | Ongoing | unknown |
| NCT04424693 | RCT  Phase 4 | G1: Tdap at 28 weeks of participants  G2: Tdap at 36 weeks of participants | Maternal Safety | Not yet recruiting | 31 December 2024 |
| NCT06258057 | Controlled cohort | G1: vaccinated pregnant participants  G2: unvaccinated pregnant participants | Maternal safety  Infant safety | Active, not recruiting | 31 December 2025 |
| NCT0646662 | Controlled cohort | G1: Tdap vaccine between 16-18 weeks of gestation  G2: Tdap vaccine between 25-27 weeks of gestation  G3: Tdap vaccine between 34-36 weeks of gestation | Immunogenicity Mother | Recruiting | 30 April 2025 |
| ***RSV*** | | | | | |
| CTRI/2021/10/037383 | RCT  Phase 3 | G1: vaccinated pregnant participants  G2: placebo | Vaccine efficacy–Infant  Immunogenicity–mother  Immunogenicity–infant  Maternal safety  Infant safety | Closed to recruitment of participants | Unknown |
| NCT06325657 | RCT  Phase 3 | G1: RSV Pre-F vaccine  G2: Placebo | Immunogenicity–mother  Immunogenicity–infant  Maternal safety  Infant safety | Completed | 11 June 2025 |
| CTRI/2021/04/033025 | RCT  Phase 3 | G1: vaccinated pregnant participants  G2: placebo | Vaccine efficacy–infant  Maternal safety  Infant safety  Immunogenicity–mother  Immunogenicity–infant | Closed to recruitment of participants | Unknown |
| NCT06955728 | RCT  Phase 4 | G1: RSV Pre-F vaccine  G2: Placebo | Efficacy infant health  Harms maternal health  Harms infant health | Not yet recruiting | 31 December 2027 |
| NCT06866405 | RCT  Phase 3 | G1: RSV Pre-F vaccine  G2: Placebo | Harms maternal health  Harms infant health  Immunogenicity child | Recruiting | 24 February 2028 |
| NCT07122661 | test-negative study  NA | G1: RSV Pre-F vaccine  G2: No intervention | Efficacy infant health | Active, not recruiting | 30 April 2027 |
| NCT06647654 | test-negative study  NA | G1: RSV Pre-F vaccine  G2: No intervention | Efficacy infant health | Active, not recruiting | 01 October 2026 |
| NCT07041190 | RCT  Phase 3 | G1: RSV Pre-F vaccine  G2: Nirsevimab  G3: RSV Pre-F vaccine + Nirsevimab | Efficacy infant health | Not yet recruiting | December 2028 |
| NCT06521944 | controlled cohort study  NA | G1: RSV Vaccine  G2: No vaccination | Harms maternal health  Harms infant health | Recruiting | 30 September 2030 |
| NCT07097012 | RCT  Phase 4 | G1: Simultaenous Tdap vaccine + RSV Pre-F vaccine + Placebo  G2: Sequential Tdap vaccine + RSV Pre-F vaccine + Placebo | Harms maternal health  Immunogenicity mother  Immunogenicity child | Recruiting | October 2027 |
| NCT06551506 | RCT  Phase 4 | G1: RSV Pre-F vaccine  G2: RSV Pre-F vaccine + Nirsevimab  G3: Nirsevimab | Harms maternal health  Harms infant health  Immunogenicity mother  Immunogenicity child | Active, not recruiting | 31 May 2026 |

**Abbreviations:** COVID-19 = Coronavirus disease of 2019; G1 = Group 1; G2 = Group2; NA = not applicable; NR = not reported; QIV = Quadrivalent influenza vaccine; RCT = Randomised controlled trial; RIV4 = Recombinant influenza vaccine; SD-IIV4 = Standard-dose inactivated influenza vaccines

## Supplementary information 4: Characteristics of maternal COVID-19 studies and evidence syntheses

| Author | Study Design | Publication type | Efficacy maternal health outcome | Efficacy infant health outcome | Harms maternal health | Harms infant health | Immunogenicity Mother | Immunogenicity Child | Timing during pregnancy | Comparison |
| --- | --- | --- | --- | --- | --- | --- | --- | --- | --- | --- |
|
| Abu Shqara et al. 1 | controlled cohort study |  |  |  |  |  | x | x | x | vaccinated vs infected |
| Accrombessi et al. 281 | controlled cross-sectional study |  |  |  |  |  | x |  |  | vaccinated vs unvaccinated |
| Ahn et al. 2 | SR |  |  |  | x | x |  |  |  | vaccinated (Moderna vs Janssen vs Astrazeneca vs Pfizer) |
| Alamoudi et al. 263 | case control study |  |  |  |  | x |  |  |  | vaccinated vs unvaccinated |
| Ali et al. 3 | cross-sectional study | preprint |  |  | x | x |  |  |  | vaccinated vs unvaccinated |
| Almutairi et al. 4 | cross-sectional study |  |  |  | x | x |  |  |  | vaccinated vs unvaccinated |
| Alsaleh et al. 5 | cross sectional study |  |  |  | x |  |  |  |  | vaccinated vs unvaccinated |
| Amaya et al. 287 | controlled cohort study |  |  | x |  | x |  |  |  | dose comparison |
| Amer et al. 282 | cross sectional study |  |  | x | x | x |  |  |  | vaccinated vs unvaccinated; dose comparison; vaccine type |
| Anwar et al. 6 | controlled cohort study |  |  |  |  |  | x |  | x | vaccinated (inactivated vs mRNA vaccine) |
| Askary et al. 7 | SR |  |  |  | x | x |  |  |  | vaccinated vs unvaccinated |
| Atyeo et al. 8 | controlled cohort study |  |  |  |  |  | x | x | x | Ad26.COV2.S (1 dose) vs mRNA-1273 (2 doses) vs BNT162b2 (2 doses) |
| Avrich et al. 217 | Test-negative |  | x |  |  |  |  |  |  | vaccinated vs unvaccinated |
| Azevedo et al. 288 | controlled cohort study |  | x |  |  |  |  |  |  | vaccinated vs unvaccinated |
| Badell et al. 9 | SR |  | x | x | x | x | x | x | x | vaccinated vs unvaccinated (with or without infection) |
| Barros et al. 10 | controlled cohort study |  | x | x |  | x |  |  |  | unvaccinated vs partially vaccinated vs completely vaccinated vs booster |
| Beharier et al. 11 | controlled cohort study |  |  |  |  |  | x | x | x | vaccinated vs infected vs unvaccinated; dose 1 vs dose 2 vs fully vaccinated |
| Bentes et al. 289 | test-negative |  |  |  |  |  |  | x |  | vaccinated vs unvaccinated |
| Bernard et al. 218 | controlled cohort study |  |  |  |  | X |  |  | X | vaccinated vs unvaccinated; dose comparison |
| Blakeway et al. 12 | controlled cohort study |  |  |  | x | x |  |  |  | vaccinated vs unvaccinated (cohort of women with balanced propensity scores) |
| Bleicher et al. 13 | controlled cohort study |  | x |  | x | x |  |  |  | vaccinated vs. unvaccinated |
| Boelig et al. 14 | controlled cohort study |  |  |  |  |  | x | x |  | vaccinated vs infected vs control (unvaccinated, uninfected) |
| Bookstein Peretz et al. 15 | controlled cohort study |  |  |  | x | x | x |  | x | dose comparison (1 vs 2 dose) |
| Brendolin et al. 16 | controlled cohort study |  |  |  | x |  |  |  | x | vaccinated vs unvaccinated |
| Brendolin et al. 290 | controlled cohort study |  | x |  | x |  |  |  |  | vaccinated vs unvaccinated |
| Butt et al. 17 | controlled cohort study |  | x |  |  |  |  |  |  | vaccinated vs unvaccinated ; BNT162b2 vs mRNA-1273 |
| Cahen-Peretz et al. 18 | controlled cohort study |  |  |  | x | x | x | x |  | dose comparison (2 doses vs 3 doses) |
| Cai et al. 19 | controlled cohort study |  |  |  | x | x |  |  |  | vaccinated vs unvaccinated |
| Calvert et al. 20 | controlled cohort study |  |  |  | x |  |  |  |  | vaccinated vs unvaccinated; BNT162b2 vs mRNA-1273 vs ChAdOx1-S/nCoV-19 |
| Calvert et al. 21 | Controlled cohort study |  |  |  |  | x |  |  |  | vaccinated vs unvaccinated |
| Carbone et al. 22 | SR |  |  |  | x | x |  |  |  | vaccinated vs unvaccinated |
| Cardemil et al. 23 | controlled cohort study |  |  | x |  |  |  | x | x | boost (3 mRNA doses) vs no boost (2 mRNA doses) |
| Carlsen et al. 24 | controlled cohort study |  | x | x |  | x |  |  |  | vaccinated vs unvaccinated; dose comparison (1 vs 2 vs 3 doses) |
| Carvalho-Sauer et al. 291 | cohort study |  | x |  |  |  |  |  |  | vaccinated vs unvaccinated |
| Cassidy et al. 25 | controlled cohort study |  |  |  | x | x | x | x | x | vaccinated (BNT162b2 vs mRNA-1237) |
| Cavalcante et al. 249 | controlled cohort study |  |  |  |  |  | x | x | x | vaccinated vs infected |
| Chamani et al. 26 | SR |  |  |  | x | x |  |  |  | vaccinated vs unvaccinated |
| Chayachinda et al. 27 | RCT |  |  |  | x | x | x | x |  | BNT162b2-BNT162b2 vs ChAdOx1-BNT162b2 vs CoronaVac-BNT162b2 |
| Chen et al. 30 | controlled cohort study |  |  |  |  |  | x | x | x | dose comparison (1 vs 2 dose) |
| Chen et al. 29 | controlled cohort study |  |  |  | x |  | x |  |  | dose comparison (2 vs 3 vs 4 doses) |
| Chen et al. 28 | controlled cohort study |  |  |  |  |  | x |  |  | vaccinated with 3 doses of COVID vs 4 doses with pertussis only or pertussis+ influenza |
| Chen et al. 264 | controlled cohort study |  |  |  |  |  | x | x |  | vaccinated vs vaccinated and infected; dose comparison |
| Chiang et al. 31 | controlled cohort study |  |  |  |  |  | x | x | x | timing (first trimester vs second trimester vs third trimester) |
| Chittajallu et al. 235 | SR |  |  |  | x | x | x | x |  | vaccinated vs unvaccinated or placebo |
| Choi et al. 250 | controlled cohort study |  |  |  | x | x |  |  |  | covid vaccinated vs influenza vaccinated |
| Ciapponi et al. 32 | RR |  |  |  | x | x |  |  |  | exposed (COVID-19 vaccine ) vs unexposed; COVID-19 vaccine vs vaccine excipient |
| Ciapponi et al. 33 | SR |  |  |  | x | x |  |  | x | vaccinated vs unvaccinated |
| Ciapponi et al. 204 | SR |  | x | x | x | x |  |  | x | vaccinated vs unvaccinated; vaccine type; dose comparison |
| Citu et al. 34 | controlled cohort study |  |  |  | x |  |  |  |  | vaccinated vs unvaccinated; Pfizer vs Moderna |
| Citu et al. 35 | controlled cohort study |  |  |  | x | x | x |  |  | vaccinated vs unvaccinated |
| Conti et al. 36 | controlled cohort study |  |  |  |  |  | x | x |  | infected vs vaccinated (2 doses of BNT162b2 mRNA vaccine) |
| Corsi Decenti et al. 37 | controlled cohort study |  | x |  |  | x |  |  |  | vaccinated vs unvaccinated |
| Craig et al. 38 | controlled cohort study |  |  |  |  |  | x | x | x | timing (vaccinated at different trimesters) |
| da Silva et al. 39 | controlled cohort study |  |  |  |  |  | x | x | x | vaccinated (uninfected) according to month of vaccination |
| da Silva et al. 40 | controlled cohort study |  |  |  |  |  | x |  |  | vaccinated vs unvaccinated; dose comparison (1 dose vs 2 doses) |
| da Silva et al. 219 | Controlled cross-sectional study |  |  |  |  |  | x |  |  | vaccinated vs unvaccinated |
| Dagan et al. 41 | controlled cohort study |  | x |  |  |  |  |  |  | vaccinated vs unvaccinated |
| Danino et al. 42 | test-negative design study |  |  | x |  | x |  |  | x | fully vaccinated (2 doses of  BNT162b2 with the second given 2 weeks to 6 months before delivery) vs partially vaccinated (only 1 dose or 2 doses with the second given more than 6 months or less than 2 weeks before delivery) vs unvaccinated |
| Daouk et al. 236 | controlled cohort study |  | x |  | x |  |  |  |  | vaccinated vs unvaccinated |
| Darwin et al. 43 | controlled cohort study |  | x |  |  | x |  |  |  | vaccinated vs unvaccinated; complete (≥2 doses of the Moderna or Pfizer vaccines or at least 1 dose of the Johnson & Johnson ) vs incomplete vaccination (1 dose of the Pfizer or Moderna vaccine) |
| de Feijter et al. 44 | controlled cohort study |  |  |  | x |  |  |  |  | vaccinated vs unvaccinated |
| de Feijter et al. 301 | controlled cohort study |  |  |  |  | x |  |  | x | vaccinated vs unvaccinated |
| de Freitas Paganoti et al. 45 | controlled cohort study |  | x |  |  |  |  |  |  | unvaccinated vs vaccinated |
| Deng et al. 46 | controlled cohort study |  | x |  | x | x | x | x | x | vaccinated vs unvaccinated ; dose comparison (1 vs 2 vs 3 doses) |
| Denoble et al. 277 | case control study |  |  |  |  | x |  |  |  | vaccinated vs unvaccinated, vaccine type, dose comparison |
| Devi et al. 292 | controlled cohort study |  | x |  |  |  |  |  |  | vaccinated vs unvaccinated, dose comparison |
| De Virgilio Suglia et al. 205 | controlled cohort study |  |  | x |  |  |  |  | x | vaccinated vs unvaccinated; dose comparison |
| Deese et al. 220 | SR |  |  | x |  |  | x |  |  | vaccinated vs. unvaccinated |
| Dick et al. 48 | controlled cohort study |  |  |  | x | x |  |  |  | vaccinated vs unvaccinated ; dose comparison (3 doses vs 2 doses) |
| Dick et al. 47 | controlled cohort study |  |  |  | x | x |  |  | x | vaccinated vs unvaccinated |
| Ding et al. 49 | SR |  |  |  | x | x |  |  | x | vaccinated vs unvaccinated |
| Divyamala et al. 50 | controlled cohort study |  | x |  |  |  |  |  |  | vaccinated vs unvaccinated |
| Dizdar et al. 51 | controlled cohort study |  |  |  | x | x |  |  | x | vaccinated vs unvaccinated |
| Du et al. 52 | controlled cohort study |  |  |  | x | x |  |  |  | vaccinated vs unvaccinated |
| Dude et al. 53 | controlled cohort study |  |  |  |  |  | x |  |  | vaccinated vs infected |
| Dutta et al. 237 | controlled cohort study |  |  |  | x | x |  |  |  | vaccine type |
| Engjom et al. 54 | controlled cohort study |  | x |  | x | x |  |  |  | vaccinated vs unvaccinated; dose comparison (1 dose vs 2 doses vs 3 doses) |
| Faherty et al. 55 | controlled cohort study |  |  |  |  | x |  |  |  | vaccinated vs unvaccinated |
| Farias et al. 213 | controlled cohort study |  |  |  |  |  | x | x | x | vaccine type |
| Favre et al. 56 | controlled cohort study |  |  |  |  | x |  |  | x | vaccinated (T1 vs T2-3) |
| Favre et al. 57 | controlled cohort study |  |  |  | x | x |  |  | x | Pfizer vs Moderna and for each comparison for 1 vs 2 doses; |
| Favre et al. 233 | controlled cohort study |  |  |  |  | x |  |  |  | vaccinated vs infected vs control (unvaccinated and uninfected) |
| Fell et al. 58 | controlled cohort study |  |  |  | x | x |  |  | x | vaccinated (during vs after pregnancy) vs unvaccinated stratified by number of doses received, vaccine product, or trimester of vaccination for dose 1 |
| Fell et al. 59 | controlled cohort study |  |  |  | x | X |  |  |  | vaccinated (during vs after pregnancy) vs unvaccinated |
| Fell et al. 60 | controlled cohort study |  |  |  |  | x |  |  | x | vaccinated vs unvaccinated |
| Fell et al. 61 | controlled cohort study |  |  |  | x | x |  |  | x | dose comparison (with vs without third dose) |
| Fernandez-Garcia et al. 62 | SR |  | x | x | x | x |  |  |  | vaccinated vs unvaccinated; dose comparison (pertially vs. fully vaccinated vs. any dose) |
| Figueroa-Romero et al. 257 | cross sectional study |  |  |  |  |  | x |  |  | vaccinated vs unvaccinated |
| Flannery et al. 63 | controlled cohort study |  |  |  |  |  | x | x |  | vaccinated vs infected; comparison of different types of vaccines |
| Fu et al. 64 | SR |  | x |  | x | x | x | x |  | vaccinated vs unvaccinated (with or without infection); |
| Gandhi et al. 216 | controlled cohort study |  |  |  | x | x |  |  |  | vaccinated vs unvaccinated |
| Gandhi et al. 221 | SR |  |  |  | x | x |  |  |  | vaccinated vs unvaccinated |
| Gastes et al. 65 | controlled cohort study |  |  |  | x |  |  |  |  | different doses of vaccine |
| Gaur et al. 66 | controlled cohort study |  |  |  |  | x |  |  |  | unvaccinated vs incompletely vaccinated (1 dose of Pfizer or Moderna) vs completely vaccinated (1 dose of Johnson & Johnson or ≥2 doses of Moderna or Pfizer) |
| Ghesquiere et al. 67 | controlled cohort study |  |  |  | x | x |  |  | x | vaccinated (T1 vs T2 vs T3) vs unvaccinated |
| Gholami et al. 251 | controlled cohort study |  |  |  | x | x |  |  | x | vaccinated vs unvaccinated, dose comparison, vaccine type |
| Goldshtein et al. 68 | controlled cohort study |  | x |  | x | x |  |  |  | vaccinated (BNT162b2 mRNA) vs unvaccinated |
| Goldshtein et al. 69 | controlled cohort study |  | x |  | x | x |  |  | x | vaccinated (BNT162b2 mRNA) vs unvaccinated; |
| Gong et al. 70 | controlled cohort study |  |  |  | x |  | x |  |  | Dose comparison (1 dose vs 2 doses vs 3 doses) |
| Gray et al. 305 | controlled cohort study |  |  |  |  |  | x | x | x | Pfizer vs Moderna |
| Guedalia et al. 73 | controlled cohort study |  | x |  |  |  |  |  |  | vaccinated (2 doses vs 3 doses) vs unvaccinated |
| Guedalia et al. 72 | case-control study |  |  | x |  |  |  |  | x | naïve (never vaccinated or tested positive, reference group) vs hybrid-immunity (vaccinated and tested positive) vs natural-immunity (tested positive before or during the study period) vs full-vaccination (two-shot regimen plus 1 booster) vs partial vaccination |
| Guedalia et al. 74 | controlled cohort study | preprint | x |  |  |  |  |  |  | vaccinated (3 doses vs 2 doses) vs unvaccinated |
| Guetzkow et al. 306 | Controlled cross-sectional study | preprint |  |  | x |  |  |  | x | vaccinated vs unvaccinated (previous vaccination or influenza), dose comparison |
| Günther et al. 293 | controlled cohort study |  | x |  |  | x |  |  |  | vaccinated vs unvaccinated |
| Hagrass et al. 75 | SR |  |  |  | x | x |  |  |  | vaccinated vs unvaccinated |
| Halasa et al. 77 | case control study |  |  | x |  |  |  |  | x | vaccinated (two doses of mRNA vaccine) vs unvaccinated |
| Halasa et al. 76 | controlled cohort study |  |  | x |  |  |  |  | x | vaccinated vs unvaccinated |
| Hall et al. 265 | controlled cohort study |  |  |  |  | x |  |  |  | vaccinated vs unvaccinated |
| Hameed et al. 78 | SR |  | x | x | x | x |  |  | x | vaccinated vs unvaccinated |
| Hamouda et al. 238 | SR |  |  |  |  |  | x | x |  | vaccine type, dose comparison |
| Hantoushzadeh et al. 79 | controlled cohort study |  |  |  |  | x |  |  |  | vaccinated vs infected vs infected +vaccinated vs controls (without infection or vaccination), vaccine type comparison |
| Hardie et al. 278 | controlled cohort study |  |  |  |  | x |  |  | x | vaccinated vs unvaccinated, dose comparison |
| Hatami et al. 80 | controlled cohort study |  |  |  |  | x |  |  | x | vaccinated (1 vs 2 doses) vs unvaccinated, vaccinated (T1 vs T2 vs T3) vs unvaccinated |
| Hemati et al. 266 | controlled cohort study |  |  |  |  |  | x | x | x | vaccinated vs infected |
| Hernandez et al. 239 | controlled cohort study |  | x |  | x | x |  |  |  | vaccinated vs unvaccinated |
| Hochmayr et al. 294 | controlled cohort study |  |  |  |  |  | x | x |  | vaccinated vs unvaccinated |
| Hui et al. 81 | controlled cohort study |  |  |  | x | x |  |  |  | vaccinated vs unvaccinated |
| Huiberts et al. 232 | controlled cohort study |  |  |  |  | x |  |  | x | vaccinated vs unvaccinated |
| Iannaccone et al. 82 | controlled cohort study |  |  |  |  | x |  |  |  | vaccinated vs unvaccinated |
| Ibroci et al. 83 | controlled cohort study |  |  |  | x | x |  |  | x | vaccinated vs unvaccinated |
| Ihenetu et al. 283 | Controlled case control study |  | x |  |  |  |  |  |  | vaccinated vs unvaccinated |
| Jarlhelt et al. 284 | Controlled cohort study |  |  |  |  |  | x | x |  | vaccinated vs unvaccinated (also infected and noninfected with vaccinated and unvaccinated subgroups) |
| Jarraya et al. 84 | controlled cohort study |  | x |  | x | x |  |  |  | vaccinated vs unvaccinated |
| Jaswa et al. 85 | controlled cohort study |  |  |  |  | x |  |  | x | vaccinated vs unvaccinated |
| Jeon et al. 222 | controlled cohort study |  | x |  |  |  |  |  |  | vaccinated vs unvaccinated; dose comparison |
| Jindal et al. 295 | controlled cohort study |  | x |  | x | x |  |  |  | vaccinated vs unvaccinated |
| Jorgensen et al. 86 | controlled cohort study |  |  |  |  | x |  |  |  | vaccinated vs unvaccinated |
| Jorgensen et al. 87 | test-negative design study |  |  | x |  |  |  |  | x | Vaccinated (2 or three doses) vs unvaccinated |
| Jorgensen et al. 240 | controlled cohort study |  |  |  |  | x |  |  | x | vaccinated vs unvaccinated |
| Juttukonda et al. 88 | controlled cohort study |  |  |  |  |  | x |  |  | vaccinated vs unvaccinated |
| Kachikis et al. 89 | controlled cohort study |  |  |  |  | x | x | x |  | vaccinated (2 doses vs ≥3 doses) |
| Karkin et al. 214 | controlled cohort study |  |  |  |  | x |  |  | x | vaccinated vs unvaccinated; vaccine type |
| Kashani-Ligumsky et al. 90 | controlled cohort study |  |  | x |  | x | x | x |  | vaccinated vs infected vs not vaccinated nor infected |
| Kayser et al. 215 | controlled cohort study |  |  |  |  | x |  |  |  | vaccinated vs unvaccinated |
| Kharbanda et al. 91 | case control study |  |  |  | x |  |  |  |  | vaccinated (any dose vs 3rd dose) |
| Kharbanda et al. 267 | controlled cohort study |  |  |  |  | x |  |  | x | vaccinated vs unvaccinated |
| Kigel et al. 92 | controlled cohort study |  |  |  |  |  | x |  | x | vaccinated (T2 vs T3) |
| Kily et al. 296 | controlled cohort study |  | x |  |  |  |  |  |  | vaccinated vs unvaccinated |
| Kim et al. 93 | controlled cohort study |  | x |  |  | x |  |  |  | vaccinated vs unvaccinated |
| Kim et al. 241 | controlled cohort study |  |  |  |  | x |  |  |  | vaccinated vs unvaccinated, vaccine type |
| Kirsebom et al. 94 | case control |  | x | x |  |  |  |  | x | vaccinated vs unvaccinated, dose comparison |
| Komine-Aizawa et al. 95 | cross sectional study |  |  |  | x |  |  |  |  | vaccinated vs unvaccinated; first vs second vaccination |
| Kong et al. 258 | controlled cohort study |  | x |  | x | x |  |  |  | vaccinated vs unvaccinated |
| Kontovazainitis et al. 96 | SR |  | x |  | x | x |  |  |  | vaccinated (any dose) vs unvaccinated |
| Korchinski et al. 223 | controlled cohort study |  |  |  |  |  | x | x | x | dose comparison |
| Kreuzberger et al. 97 | Scoping Review |  |  |  | x | x | x | x |  | dose comparison |
| Krishna et al. 98 | SR |  | x |  | x | x | x | x |  | vaccinated vs unvaccinated |
| Kugelman et al. 100 | controlled cohort study |  |  |  |  | x |  |  |  | vaccinated vs. unvaccinated |
| Kugelman et al. 99 | controlled cohort study |  |  |  | x | x | x | x |  | booster vs vaccinated without booster |
| La Fauci et al. 101 | controlled cohort study |  |  |  |  |  | x |  |  | vaccinated vs unvaccinated |
| Lam et al. 102 | SR |  |  |  | x | x | x | x |  | vaccinated vs unvaccinated |
| Lapinsky et al. 103 | case control study |  | x |  |  |  |  |  |  | vaccinated vs unvaccinated |
| Lauritsen et al. 104 | controlled cohort study |  |  |  |  |  | x | x |  | vaccinated (with or without infection) vs unvaccinated (with or without infection) |
| Law et al. 105 | controlled cohort study |  |  |  | x | x |  |  |  | vaccinated vs unvaccinated; dose comparison (1 vs 2 doses) |
| Lei et al. 285 | SR |  | x | x | x | x |  |  | x | vaccinated vs unvaccinated, vaccine type, dose comparison |
| Leung et al. 203 | controlled cohort study |  | x |  | x | x |  |  |  | vaccinated vs unvaccinated |
| Li et al. 299 | controlled cohort study |  |  |  |  |  | x | x | x | vaccinated vs infected vs vaccinated and infected, dose comparison |
| Lindsay et al. 106 | controlled cohort study |  |  |  | x | x |  |  |  | infected vs uninfected vs vaccinated vs unvaccinated |
| Lipkind et al. 107 | controlled cohort study |  |  |  |  | x |  |  | x | unvaccinated vs vaccinated; dose comparison (1 vs 2 doses) |
| Lu et al. 108 | controlled cohort study |  |  |  | x | x |  |  |  | vaccinated vs unvaccinated |
| Lubrano et al. 109 | controlled cohort study |  |  |  | x | x | x | x |  | vaccinated vs unvaccinated |
| Luxi et al. 302 | controlled cohort study |  |  |  | x |  |  |  |  | dose comparison, vaccine type |
| Ma et al. 111 | controlled cohort study |  |  |  | x | x | x | x |  | vaccinated vs unvaccinated |
| Ma et al. 110 | SR |  | x |  | x | x |  |  | x | vaccinated vs unvaccinated |
| Magnus et al. 112 | controlled cohort study |  |  |  |  | x |  |  | x | vaccinated vs unvaccinated |
| Magnus et al. 242 | controlled cohort study |  |  |  |  | x |  |  |  | vaccinated vs unvaccinated |
| Maguire et al. 113 | controlled cohort study |  | x |  | x | x |  |  |  | partially vaccinated or unvaccinated vs vaccinated |
| Mahyuddin et al. 259 | controlled cohort study |  |  |  |  |  | x | x | x | vaccinated vs unvaccinated |
| Malamule et al. 279 | Scoping Review |  |  |  | x | x |  |  |  | vaccinated vs unvaccinated |
| Mand et al. 243 | controlled cohort study |  | x |  |  | x |  |  |  | vaccinated vs vaccinated and infected vs unvaccinated and infected |
| Mansour et al. 114 | controlled cohort study |  |  |  |  | x |  |  |  | vaccinated (BNT162b2 vs mRNA-1237) |
| Marchand et al. 115 | SR |  | x |  | x | x | x | x | x | vaccinated vs unvaccinated |
| Mardiyan Kurniawati et al. 276 | SR | preprint |  |  |  |  | x |  |  | vaccine type, dose comparison |
| Márques et al. 260 | cross sectional study |  |  |  |  |  | x |  |  | vaccinated vs unvaccinated, dose comparison |
| Martinez-Varea et al. 116 | controlled cohort study |  | x | x | x | x |  | x |  | vaccinated vs unvaccinated |
| Mascolo et al. 117 | controlled cohort study |  |  |  | x | x |  |  |  | mRNA vaccines vs viral vector-based vaccines vs mixed |
| Masry et al. 268 | controlled cohort study |  |  |  |  |  |  | x |  | vaccinated vs infected, dose comparison |
| Mata-Miranda et al. 269 | controlled cohort study |  |  |  |  |  | x | x | x | vaccinated vs unvaccinated, vaccine type |
| Matsui et al. 118 | controlled cohort study |  |  |  |  |  | x | x | x | vaccinated vs unvaccinated (infected) vs unvaccinated (uninfected) |
| Matsunashi et al. 244 | controlled cohort study |  |  |  | x | x | x | x |  | vaccinated vs infected, dose comparison |
| McClymont et al. 119 | controlled cohort study |  | x |  | x | x |  |  | x | vaccinated vs unvaccinated3 |
| Mendenhall et al. 120 | controlled cohort study |  |  |  |  | x |  | x |  | vaccinated vs unvaccinated vs infected (mother and or foetus positive) |
| Mensah et al. 121 | case control study |  |  |  | x | x |  |  | x | vaccinated vs unvaccinated, vaccine type |
| Mercade-Besora et al. 303 | controlled cohort study | preprint | x |  |  |  |  |  |  | vaccinated vs unvaccinated, dose comparison, vaccine type |
| Mohammadi et al. 206 | SR |  |  |  | x | x |  |  |  | vaccinated vs unvaccinated |
| Morgan et al. 122 | controlled cohort study |  | x |  | x | x |  |  |  | vaccinated vs unvaccinated |
| Moro et al. 124 | controlled cohort study |  |  |  | x | x |  |  |  | vaccinated (BNT162b2 vs mRNA-1273 vs Ad26.COV2.S ) |
| Moro et al. 123 | controlled cohort study |  | x |  | x | x |  |  |  | vaccinated (BNT162b2 vs mRNA-1273 vs monovalent Booster-BNT162b2 + mRNA-1273) |
| Moro et al. 125 | controlled cohort study |  |  |  | x | x |  |  |  | booster dose with BNT162b2 vs booster dose with mRNA1273 |
| Movahedi et al. 297 | controlled cohort study |  | x |  |  | x |  |  |  | vaccinated vs unvaccinated, dose comparison |
| Moza et al. 126 | controlled cohort study |  | x | x | x | x |  |  |  | vaccinated vs unvaccinated |
| Munoz et al. 127 | controlled cohort study |  |  |  |  | x | x | x |  | vaccinated (Pfizer vs Moderna vs booster) |
| Munoz et al. 224 | controlled cohort study |  |  |  |  |  |  | x |  | vaccinated vs unvaccinated; dose comparison |
| Munoz et al. 270 | controlled cohort study |  |  |  |  |  | x | x |  | vaccinated vs unvaccinated, dose comparison |
| Murphy et al. 128 | controlled cohort study |  |  |  |  |  | x | x |  | vaccinated vs unvaccinated vs. infected, different dosages and types of vaccines |
| Nevo et al. 129 | controlled cohort study |  |  |  | x |  | x | x | x | convalescent vs boosted convalescent vs vaccinated, boosting vs second mRNA vaccine |
| Ng et al. 130 | controlled cohort study |  |  | x |  |  |  |  |  | booster vs. second vaccination |
| Ni et al. 207 | controlled cohort study |  | x |  |  |  |  |  |  | vaccinated vs unvaccinated |
| Norman et al. 131 | controlled cohort study |  |  |  |  | x |  |  | x | vaccinated vs unvaccinated |
| Novillo et al. 132 | SR |  | x |  | x |  | x | x |  | vaccinated (different doses and vaccine types) vs unvaccinated |
| Nowakowska et al. 133 | controlled cohort study |  |  |  |  |  | x | x |  | vaccinated vs unvaccinated grouped by infection status |
| Ohta et al. 234 | controlled cohort study |  | x |  |  |  | x |  |  | vaccinated vs unvaccinated |
| Oliveira et al. 225 | SR |  |  |  | x | x |  |  |  | vaccine type |
| Otero et al. 134 | controlled cohort study |  |  |  |  |  | x | x |  | vaccinated vs infected |
| Oz-Alcalay et al. 135 | controlled cohort study |  |  |  |  |  |  | x | x | vaccinated (with vs without prior covid) vs unvaccinated (prior infection) |
| Ozer et al. 136 | controlled cohort study |  |  |  | x |  |  |  |  | vaccinated vs unvaccinated |
| Paixao et al. 137 | case control study |  | x |  |  |  |  |  |  | vaccinated vs unvccinated; 1 vs 2 doses |
| Pandit et al. 138 | controlled cohort study |  | x |  | x | x |  |  |  | vaccinated vs unvaccinated |
| Partey et al. 271 | controlled cohort study |  |  |  |  |  | x | x |  | vaccinated vs unvaccinated |
| Pecks et al. 252 | controlled cohort study |  |  |  | x | x |  |  |  | vaccinated vs unvaccinated |
| Peretz-Machluf et al. 139 | cross-sectional study |  |  |  | x | x |  |  |  | booster vs 2 doses |
| Peretz-Machluf et al. 140 | controlled cohort study |  |  |  | x | x |  |  |  | vaccinated vs unvaccinated |
| Piekos et al. 141 | controlled cohort study |  | x |  | x | x |  |  |  | vaccinated vs unvaccinated; Boosted vs vaccinated but not boosted vs vaccinated but not boosted matched |
| Plitman et al. 142 | case-control study | preprint |  |  |  |  | x | x | x | unvaccinated uninfected vs COVID positive vs vaccinated |
| Popescu et al. 143 | controlled cohort study |  |  |  |  | x |  |  |  | vaccinated vs infected vs unvaccinated |
| Prasad et al. 144 | SR |  | x |  | x | x |  |  |  | vaccinated vs unvaccinated |
| Pratama et al. 145 | SR |  | x |  | x | x | x | x | x | vaccinated vs unvaccinated; Pfizer–BioNTech vaccine vs Moderna vaccine; first vs second dose |
| Qin et al. 308 | controlled cohort study |  | x |  |  |  |  |  |  | vaccinated vs unvaccinated, dose comparison |
| Qiuyuan et al. 146 | controlled cohort study | preprint | x |  |  |  |  |  |  | vaccinated (fully vs partially vaccinated) vs unvaccinated |
| Quijada-Cazorla et al. 226 | controlled cohort study |  | x |  |  |  |  |  |  | vaccinated vs unvaccinated |
| Raffetti et al. 147 | controlled cohort study |  |  |  | x | x |  |  | x | vaccinated vs unvaccinated, dose comparison |
| Rahmati et al. 148 | SR |  | x | x | x | x |  |  |  | vaccinated vs unvaccinated |
| Rawal et al. 149 | SR |  |  |  | x | x | x | x |  | vaccinated vs unvaccinated |
| Ray et al. 298 | controlled cohort study |  |  |  |  |  |  | x | x | vaccine type, dose comparison |
| Regan et al. 272 | controlled cohort study |  |  |  | x | x |  |  |  | vaccinated vs unvaccinated |
| Rimmer et al. 150 | SR |  |  |  | x | x |  |  |  | vaccinated vs unvaccinated |
| Rodríguez-Blanco et al. 253 | controlled cohort study |  | x |  | x | x |  |  | x | vaccinated vs unvaccinated, dose comparison |
| Rojas et al. 227 | controlled cohort study |  |  |  |  |  | x | x |  | vaccinated vs unvaccinated |
| Roque-Pereira et al. 261 | test-negative |  |  |  | x | x |  |  |  | vaccine type |
| Rottenstreich et al. 154 | controlled cohort study |  |  |  |  |  | x | x | x | vaccinated (early vs late T3) |
| Rottenstreich et al. 153 | controlled cohort study |  |  |  |  |  | x | x | x | dose comparison (booster vs without booster) |
| Rottenstreich et al. 155 | controlled cohort study |  |  |  | x | x |  |  |  | vaccinated (2 doses vs 3 doses) vs unvaccinated |
| Rottenstreich et al. 152 | controlled cohort study |  |  |  |  | x |  | x | x | 2 dose vaccinated at different time points (T1, T2, T3) |
| Rottenstreich et al. 151 | controlled cohort study |  |  |  | x |  |  | x | x | 2 vs 3 doses (BNT162b2) |
| Rottenstreich et al. 156 | controlled cohort study |  |  |  | x | x |  |  |  | vaccinated vs unvaccinated |
| Rowe et al. 228 | controlled cohort study |  |  |  | x |  |  |  |  | vaccinated vs unvaccinated |
| Rowe et al. 229 | controlled cohort study |  |  |  |  | x |  |  |  | vaccinated vs unvaccinated, vaccine type |
| Ruderman et al. 157 | controlled cohort study |  |  |  |  | x |  |  | x | vaccinated vs unvaccinated |
| Sabharwal et al. 158 | controlled cohort study |  |  |  |  |  | x | x |  | vaccinated vs unvaccinated |
| Sabharwal et al. 159 | controlled cohort study |  |  |  |  |  | x | x | x | vaccinated vs infected |
| Sadarangani et al. 160 | controlled cohort study |  |  |  | x | x |  |  | x | vaccinated vs unvaccinated; 1 dose vs 2 doses; BNT162b2 vs mRNA-1273; |
| Sánchez-Salguero et al. 245 | controlled cohort study |  |  |  |  |  | x |  |  | vaccinated vs unvaccinated |
| Santimano et al. 161 | SR and MA |  |  |  | x | x |  |  |  | vaccinated (Pfizer and Moderna) |
| Santos et al. 286 | controlled cohort study |  |  |  |  | x |  |  | x | vaccinated vs unvaccinated |
| Schrag et al. 162 | case control study |  | x |  |  |  |  |  | x | vaccinated (2 doses vs 3 doses) vs unvaccinated |
| Serra et al. 163 | controlled cohort study |  | x |  |  |  |  |  |  | vaccinated vs unvaccinated |
| SeyedAlinaghi et al. 164 | SR |  |  |  | x | x |  |  |  | vaccinated vs unvaccinated |
| Sgayer et al. 246 | controlled cohort study |  |  |  |  |  | x |  |  | vaccinated vs infected vs vaccinated and infected vs unvaccinated and uninfected |
| Shafiee et al. 165 | SR |  |  |  | x | x |  |  |  | vaccinated vs unvaccinated |
| Shahraki-Sanavi et al. 208 | controlled cohort study |  |  |  | x |  |  |  |  | vaccine type |
| Sharma et al. 230 | controlled cohort study |  |  |  |  | x |  |  | x | vaccinated vs unvaccinated |
| Shen et al. 166 | controlled cohort study |  |  |  |  |  | x | x |  | dose comparison (1 dose vs 2 doses) |
| Sheth et al. 254 | case control study |  |  |  | x |  |  |  |  | vaccinated vs unvaccinated, vaccine type, dose comparison |
| Shimabukuro et al. 167 | controlled cohort study |  |  |  | x | x |  |  |  | dose comparison (1 vs 2 doses); Pfizer–BioNTech vs Moderna |
| Shook et al. 168 | controlled cohort study |  |  |  |  |  | x | x |  | vaccinated vs unvaccinated (infected) |
| Simanjuntak 300 | controlled cohort study |  |  |  | x | x |  |  |  | vaccinated vs unvaccinated |
| Simeone et al. 169 | case control study |  |  | x |  |  |  |  | x | vaccinated (second dose or higher) vs unvaccinated |
| Sotoodeh Ghorbani et al. 170 | rapid review |  | x |  | x | x | x | x |  | vaccinated vs unvaccinated |
| St Clair et al. 171 | controlled cohort study |  | x |  |  |  | x |  | x | vaccinated vs unvaccinated |
| Stock et al. 172 | controlled cohort study | preprint | x |  | x | x |  |  |  | vaccinated vs unvaccinated |
| Stracuzzi et al. 255 | controlled cohort study |  |  |  |  |  | x | x |  | vaccinated vs unvaccinated |
| Strathmann et al. 209 | controlled cohort study |  | x |  | x | x |  |  |  | vaccinated vs unvaccinated |
| Strzelecka et al. 173 | controlled cohort study |  |  |  |  | x |  |  |  | vaccinated vs unvaccinated |
| Sturrock et al. 256 | controlled cohort study |  |  |  |  |  | x | x | x | vaccinated vs vaccinated vs vaccinated and infected |
| Subramaniam et al. 174 | case control study |  |  | x | x | x |  |  | x | vaccinated (1, 2 or 3 doses) vs. unvaccinated (at least partially vaccinated vs fully vaccinated) |
| Sunder et al. 175 | controlled cohort study |  |  |  |  |  | x | x |  | vaccinated (Sinopharm vs Pfizer) |
| Sunder et al. 176 | controlled cohort study |  |  |  | x | x | x | x |  | vaccinated vs infected |
| Sut et al. 177 | controlled cohort study |  |  |  | x | x |  |  | x | vaccinated vs unvaccinated |
| Svirsky et al. 210 | controlled cohort study |  | x |  |  |  | x |  | x | vaccinated vs unvaccinated |
| Tamir-Hostovsky et al. 247 | case control study |  |  |  | x | x |  |  | x | vaccinated vs unvaccinated |
| Tavares Veras Florentino et al. 178 | controlled cohort study |  |  |  |  | x |  |  | x | vaccinated vs unvaccinated |
| Theiler et al. 179 | controlled cohort study |  | x |  | x | x |  |  |  | vaccinated vs unvaccinated |
| Tormen et al. 180 | SR |  | x |  | x | x |  |  |  | vaccinated vs unvaccinated |
| Toussia-Cohen et al. 182 | controlled cohort study |  |  |  | x |  | x |  |  | dose comparison (1st and 2nd dose vs 3rd dose) |
| Toussia-Cohen et al. 181 | controlled cohort study |  |  |  |  |  | x | x |  | vaccinated vs infected; dose comparison (2 doses vs 3 doses) |
| Tripathy et al. 183 | controlled cohort study |  |  |  | x | x |  |  | x | vaccinated vs unvaccinated |
| Tsiorou et al. 184 | SR |  | x |  | x |  | x | x |  | vaccinated vs unvaccinated |
| Tudisco et al. 185 | controlled cohort study |  | x |  | x | x |  |  |  | vaccinated vs unvaccinated |
| Uta et al. 186 | SR |  |  |  | x | x |  |  | x | vaccinated vs unvaccinated |
| Vatanparast et al. 273 | controlled cohort study |  |  |  | x | x |  |  |  | vaccinated vs unvaccinated, dose comparison |
| Vazquez-Benitez et al. 187 | controlled cohort study |  |  |  | x | x |  |  |  | vaccinated vs unvaccinated |
| Velez et al. 188 | controlled cohort study |  |  |  | x |  |  |  |  | recently vaccinated vs remotely vaccinated vs unvaccinated |
| Verma et al. 275 | controlled cohort study |  |  |  |  |  | x |  |  | vaccinated vs unvaccinated, dose comparison |
| Vesco et al. 280 | controlled cohort study |  |  |  | x | x |  |  | x | vaccinated vs unvaccinated |
| Vetter-Laracy et al. 189 | controlled cohort study |  |  | x |  |  |  | x |  | vaccinated vs unvaccinated (infected) vs vaccinated and infected |
| Villar et al. 190 | controlled cohort study |  | x |  | x | x |  |  |  | vaccinated vs unvaccinated; vaccine type; completely vaccinated ( two doses of any vaccine or one dose of Ad26.COV2.S) vs partially vaccinated (one dose of any vaccine other than Ad26.COV2.S) vs booster vs unvaccinated |
| Voiniusyte et al. 191 | cross-sectional study |  |  |  | x |  |  |  |  | dose comparison (1 dose vs 2 doses) |
| Wagner et al. 211 | controlled cohort study |  |  |  |  |  | x | x |  | vaccinated -uninfected vs unvaccinated -infected vs infected |
| Wainstock et al. 192 | controlled cohort study |  |  |  | x | x |  |  |  | vaccinated vs unvaccinated ; dose comparison (1 dose vs 2 doses) |
| Wang et al. 193 | SR |  |  |  | x | x |  |  | x | vaccine type, dose and timing comparisons |
| Watanabe et al. 194 | SR |  | x |  | x | x |  |  | x | vaccinated vs unvaccinated |
| Woestenberg et al. 195 | controlled cohort study |  |  |  |  | x |  |  | x | timing |
| Woestenberg et al. 212 | controlled cohort study |  |  |  |  | x |  |  | x | vaccinated vs unvaccinated; vaccine type |
| Wong et al. 231 | controlled cohort study |  |  |  | x |  |  |  | x | dose comparison, vaccine type |
| Wu et al. 196 | SR |  | x |  | x | x |  |  |  | vaccinated (mRNA, inactivated virus vaccine) vs unvaccinated |
| Yang et al. 197 | controlled cohort study |  |  |  |  |  | x | x | x | booster dose vs two doses |
| Yeniocak et al. 274 | controlled cohort study |  | x |  | x | x |  |  |  | vaccinated vs unvaccinated |
| Zare Sakhvidi et al. 198 | controlled cohort study |  |  |  | x | x |  |  |  | vaccinated vs unvaccinated  dose comparison (1 dose vs 2 doses) |
| Zerbo et al. 200 | controlled cohort study |  | x |  |  |  |  |  |  | vaccinated vs unvaccinated  dose comparison (1 dose vs 2 doses vs 3 doses) across different variant periods |
| Zerbo et al. 199 | controlled cohort study |  |  | x |  |  |  |  | x | vaccinated vs unvaccinated, dose comparison |
| Zhang et al. 201 | SR |  |  | x |  | x |  |  | x | vaccinated vs unvaccinated |
| Zhang et al. 248 | controlled cohort study |  |  |  | x |  |  |  |  | vaccinated vs unvaccinated |
| Zhong et al. 202 | case control study |  | x | x |  |  |  |  | x (for the second dose T1 vs T2) | v accinated vs unvaccinated  dose comparison (one dose vs two doses vs three doses) |
| Zhu et al. 262 | controlled cohort study |  | x | x |  |  |  |  |  | vaccinated vs unvaccinated |
| Zidan et al. 304 | RCT |  | x |  |  |  |  |  |  | vaccinated vs unvaccinated |

## Supplementary information 5: Study characteristics extracted from the selected systematic reviews

| **Author, Year,**  **Registry Number,**  **Condition,**  **KQ**  **Sponsor** | **Design,**  **Country,**  **Search period,**  **Databases** | **SR number of included studies,**  **Number of relevant studies (participants),**  **N Overall** | **Study groups for SR,**  **Intervention group(s),**  **Comparison groups,**  **Subgroup analysis** | **Vaccine (sponsor)**  **Dose** | **Population,**  **Ethnicity** | **Gestational week at injection (range),**  **Presence of co-administration of vaccines** |
| --- | --- | --- | --- | --- | --- | --- |
| **COVID-19** | | | | | | |
| Ciapponi et al. 2024 204  CRD42021281290  *Condition*:  COVID-19  KQ 1  *Funding*:  Foundation/non-profit professional organization | Living Systematic Review  *Country*:  USA, Israel, Canada, Brazil, Europe, India, China, other countries, and multiple countries (41 countries)  *Search Period:*  January 2020 to October 2023, Cochrane Library databases, MEDLINE, EMBASE, Latin American and Caribbean Health Sciences Literature (LILACS), Science Citation Index Expanded (SCIEXPANDED), China Network Knowledge Information (CNKI), Chinese Biomedical Literature Database (CBM), Chinese Science Journal Database (VIP), WHO Database of publications on SARS-CoV-2, EPPI-Centre map of the current evidence on COVID-19, guidelines published by national and international professional societies (e.g., American College of Obstetricians and Gynecologists, Royal College of Obstetricians and Gynecologists, International Federation of Gynecology and Obstetrics), pre-print servers (ArXiv, BiorXiv, medRxiv, search.bioPreprint), and COVID-19 research websites, including the WHO Global research on coronavirus disease (COVID-19) website, COVID-19 Vaccine Tracker, the L-OVE Platform, and the COVID19 Living Evidence. Additional relevant studies were identified by hand searching the reference lists of the identified systematic reviews. | *SR number of included studies:*  177 (137 analysed) controlled and uncontrolled studies  *N relevant studies/participants:*  Cohort studies (n=95), cross-sectional (n=12), case-control (n=10), case series (n=10), case report (n=9), and controlled clinical trial (n=1), Out of 137 publications, 33 reported adjusted measures and were included in the meta-analysis (participants = NR)  *N Overall:*  Overall: 638,791 | *Intervention group:*  G1: Covid-19 vaccine (mRNA, viral vector or inactivated vaccine)  *Comparison group:*  G2: no vaccine  *Subgroup analysis:*  Vaccine type, dose | *Vaccine (sponsor):*  Among 10 products most frequently:  BNT162b2 (Pfizer/ BioNTech)  mRNA-1273 (Moderna)  Janssen/Johnson & Johnson (Ad26,COV2,S)  *Dose:*  1 or 2 doses (not specified) | *Population:*  Pregnant women irrespective of comorbidities or baseline risk  *Ethnicity:*  NR | *Gestational week:*  NR  *Presence of co-administration of vaccines:*  NR |
| Fernández-García et al. 202462  NR  *Condition*:  COVID-19  KQ 1  *Funding*:  Government, Foundation/non-profit professional organisation | Systematic Review  *Country*:  Middle and high-income countries in Middle East, North Africa, North America, Europe and Central Asia, East Asia and Pacific and Latin America and Caribbean, South Asia  *Search period:*  1 December 2019 to 30 January 2023  MEDLINE, Embase, Cochrane database, WHO COVID-19 database, Living Overview of the Evidence platform, China National Knowledge Infrastructure and Wanfang databases | *SR number of included studies:*  67 studies, 24 studies for primary analysis – no information about study design  *N relevant studies/participants:*  COVID-19 vaccine vs. no vaccine  24 test-negative studies and cohort studies (730,269 participants)  *N Overall:*  1,813,947 | *Intervention group:*  G1: COVID-19 vaccine  *Comparison group:*  G2: No vaccine  *Subgroup analysis:*  Dose | *Vaccine (sponsor):* Comirnaty (BioNTech/Pfizer), Spikevax (Moderna), CoronaVac (Sinovac), BIBP (Sinopharm), Jcovden (Janssen)  *Dose:*  1-3 dose*s* | *Population*:  Pregnant people at low risk for complications or not specified  *Ethnicity:*  NR | *Gestational week:*  First to third trimester  *Presence of co-administration of vaccines:*  NR |
| Lei et al. 2024 285  NR  *Condition*:  COVID-19  KQ 1  *Funding*:  Foundation/non-profit professional organization | Systematic Review  *Country*:  USA, Canada, UK, China, Israel, South Korea, Tailand, Singapore, India, Iran, Turkey, Scotland, Sweden, Norway, Germany, Australia, Mexico, and Qatar  *Search Period:*  up to October 20, 2024, in PubMed, Embase, Cochrane, and Scopus, reference lists of relevant studies | *SR number of included studies:*  82 studies (72 cohort studies, 10 case–control studies)  *N relevant studies/participants:*  Covid-19 vaccine vs. no vaccine (82 studies)  *N Overall:*  3,676,654 | *Intervention group:*  G1: Covid-19 vaccine (mRNA, viral vector or inactivated vaccine)  *Comparison group:*  G2: no vaccine  *Subgroup analysis:*  By prior infection status, vaccine type, dose, timing | *Vaccine (sponsor):*  mRNA vaccine (Moderna, Pfzer-BioNTech)  inactivated vaccine (SinovacBiotech,Sinopharm Biotech, Covaxin)  adenovirusvaccine (COVISHIELD, Sputnik V)  *Dose:*  1-3 doses (not specified) | *Population:*  Pregnant women  *Ethnicity:*  NR | *Gestational week:*  NR  *Presence of co-administration of vaccines:*  NR |
| Wang et al. 2024193  NR  *Condition*:  COVID-19  KQ 1, KQ 1a  *Funding*:  None | Systematic Review  *Country*:  Scotland, USA, Israel, Norway, Canada, Sweden, UK, Romania, Australia, China, Saudi Arabia, India, Brazil, and Iran  *Search period:* Until 24 September 2023  PubMed, Web of Science, and Embase | *SR number of included studies:*  39 studies  *N relevant studies/participants:*  COVID-19 vaccine vs. no vaccine:  34 cohort studies (1,358,929 participants)  COVID-19 vaccine vs. no vaccine:  4 case-control studies (284,092 participants)  COVID-19 vaccine vs. no vaccine:  1 cross-sectional study (214 participants)  *N Overall:*  1,642,785 | *Intervention groups:*  G1: COVID-19 vaccine (mRNA, viral vector or inactivated vaccine)  *Comparison group:*  G2: no vaccine  *Subgroup analysis:*  Timing | *Vaccine (sponsor):*  Comirnaty (BioNTech/Pfizer), Spikevax (Moderna), Vaxzervria (Astra Zeneca), Jcovden (Janssen)  *Dose:*  1-2 doses, occasionally 3 | *Population*:  Pregnant people, not further specified  *Ethnicity:*  NR | *Gestational week:*  6 weeks pre-conception until third trimester  *Presence of co-administration:*  NR |
| **Influenza** | | | | | | |
| Bansal et al. 2021309  NR  *Condition*:  Influenza  KQ 1, KQ1a  *Funding*:  Government, Academic | Systematic Review  *Country*:  Bangladesh, South Africa, Mali, Nepal, USA, Australia, Japan, UK, Denmark  *Search period:*  Until May 27, 2021  PubMed, Google Scholar, MEDLINE, Embase, WHO International Clinical Trials Registry Platform  (ICTRP), and UpToDate | *SR number of included studies:*  14 studies*  *N relevant studies/participants:* Seasonal TIV (2004 SH) vs. Pneumococcal vaccine:  1 RCT (340 participants)  TIV (split virion 2011 and 2012 SH, 2010–2012 NH and 2011–2013 SH) vs. saline placebo:  3 RCTs (9,502 participants)  TIV vs meningococcal vaccine (2011 NH,  2012 NH and 2012 SH):  1 RCT (4,193 participants)  IIV vs. no vaccine:  4 cohort studies (37,567 participants)  2 screening methods (155 participants)  3 case-control studies (1517 participants)  *N Overall:*  53,274 | *Intervention groups:*  G1: TIV or inactivated influenza vaccine (IIV)  *Comparison groups:*  G2: Pneumococcal vaccine, meningococcal vaccine, saline placebo or no vaccine, head to head with adjuvanted vaccine, another inactivated influenza vaccine  *Subgroup analysis:*  None | *Vaccine (sponsor):*  NR  *Dose:*  NR | *Population*:  Pregnant people at low risk for complications  *Ethnicity:*  NR | *Gestational week:*  NR  *Presence of co-administration of vaccines:*  NR |
| Wolfe et al. 2023307  CRD42020159030  *Condition*:  Influenza  KQ 1  *Funding*:  Government | Systematic Review  *Country*:  South Africa, Australia, Japan, India, Nicaragua, USA, Laos, Canada  *Search period:*  Until June 2021  Ovid MEDLINE ALL, Embase Classic+Embase and the Cochrane Central Register of Controlled Trials from inception | *SR number of included studies:*  63 studies (29 studies included in primary data synthesis)  *N relevant studies/participants:* Seasonal vaccine (TIIV) vs. no vaccine:  22 cohort studies (861,217 participants)  4 case-control studies (7,903 participants)  Seasonal vaccine (TIIV and QIIV) vs. no vaccine:  2 cohort studies (72,568 participants)  Seasonal vaccine (TIIV or QIIV) vs. no vaccine:  1 case-control study (1,910 participants)  *N Overall:*  943,598 | *Intervention groups:*  G1: seasonal influenza vaccines (TIIV, TIIV and QIIV, TIIV or QIIV)  *Comparison group:*  G3: no vaccine  *Subgroup analysis:*  None | *Vaccine (sponsor):*  NR  D*ose:*  NR | *Population*:  Pregnant people, not further specified  *Ethnicity:*  NR | *Gestational week:*  NR  *Presence of co-administration of vaccines:*  NR |
| **Pertussis** | | | | | | |
| Andersen et al. 2022310  CRD42020181142  *Condition*:  Pertussis  KQ 1  *Funding*:  None | Systematic Review  *Country*:  United States, Australia, Belgium, Brazil, New Zealand, United Kingdom, Canada, Czech Republic, Finland, Italy, Spain, Thailand, Vietnam  *Search period:*  Until January 14, 2021  PubMed and Embase | *SR number of included studies:*  19 studies  *N relevant studies/participants:* Pertussis vaccine Tdap vs. placebo:  3 RCTs (1336 participants)  Pertussis vaccine Tdap vs. no vaccine:  13 cohort studies (1,740,539 participants)  Pertussis vaccine Tdap vs. Td:  2 RCTs (315 participants)  Pertussis vaccine Tdap vs. TT:  1 RCT (103 participants)  *N Overall:*  1,749,463  Study population sizes varied from 99 to 1,079,034 participants in the observational studies and from 42 to 687 participants in the RCTs. | *Intervention group:*  G1: Pertussis vaccine (as Tdap or DTaP/IPV)  *Comparison groups:*  G2: No vaccine or placebo  G3: Td  G4: TT  *Subgroup analysis:*  None | *Vaccine (sponsor):*  NR  *Dose:*  NR | *Population*:  Pregnant people at low risk for complications or not specified  *Ethnicity:*  NR | *Gestational week:*  0-40 weeks, most commonly ≥27 weeks  *Presence of co-administration of vaccines:*  NR |
| De Weerdt et al. 2024 311  CRD42023459133  *Condition*:  Pertussis  KQ 1a  *Funding*:  Foundation/non-profit professional organization | Systematic Review  *Country*:  USA, Netherlands, UK, Argentina or NR  *Search period*:  Until September 28, 2023, PubMed, MEDLINE and Web of Science | *SR number of included studies:*  45 studies (35 analysed)  *Number of relevant studies:*  Timing 1 vs Timing 2 (4 RCT, n=1225 ;25 cohort studies, n=266 469; 1 case-control studies, n=2359; 1 cross-sectional study, n=318; 4 not mentioned, n=1852)  *N Overall:*  416,278 | *Intervention group:*  G1: Maternal Tdap vaccine at timing 1  *Comparison groups:*  G2: Maternal Tdap vaccine at timing 2  *Subgroup analysis*:  NR | *Vaccine (sponsor):*  Tdap (not reported)  *Dose:*  1 dose (not specified) | *Population:*  Pregnant women  *Ethnicity:*  NR | *Gestational week:*  Various in relation to study group comparison  *Presence of co-administration of vaccines:*  NR |
| Gidengil et al. 2021 312  CRD42020180089  *Condition*:  Influenza, Pertussis  KQ 1, KQ 1a  *Funding*:  NR | Systematic Review  *Country*:  Canada, USA, Czech Republic, Spain, Mexico, Australia, Italy, Finland, Brazil, New Zealand  *Search period:*  Until November 9, 2020, MEDLINE®, Embase®, CINAHL®, Cochrane CENTRAL, Web of  Science, and Scopus | *SR number of included studies:*  18 studies (4 RCTs, 13 cohort studies, 1 case-control)  *N relevant studies/participants:*  Pertussis  Tdap versus placebo:  3 RCTs (909 participants)  Tdap vs. Td:  1 RCT (273 participants)  Tdap vs. no vaccine:  13 cohort studies (1,930,975 participants)  1 case-control study (552 participants)  Tdap >27 weeks vs. Tdap <27 weeks: 1 cohort study (1,079,034 participants)  Tdap 0–13 weeks vs. Tdap 27–36 weeks: 1 cohort study (145,883)  Influenza  IIV + Tdap vs. IIV alone:  1 cohort study (13,758 participants)  *N Overall:*  Pertussis  1,932,709  Influenza  13,758 | Pertussis  *Intervention group:*  G1: Tdap  *Comparison group:*  G2: Placebo, no intervention or Td  Influenza  G3: IIV + Tdap  G4: Tdap  *Subgroup analysis:*  Timing | *Vaccine (sponsor):*  Pertussis  G1: Adacel (Sanofi), Boostrix (GlaxoSmithKline)  G2: TDVAX (MassBiologics), Tenivac (Sanofi)  Influenza  G3: Afluria Quadrivalent (Seqirus), Flucelvax Quadrivalent (Seqirus), Fluarix Quadrivalent (GlaxoSmithKline), Flulaval Quadrivalent (GSK), Fluzone High Dose Quadrivalent (Sanofi), Fluzone Quadrivalent (Sanofi)  G4: Adacel (Sanofi), Boostrix (GlaxoSmithKline)  *Dose:*  1 dose or NR | *Population*:  Pregnant people  *Ethnicity:*  Overall: 49-74% non-white  G1: 7-98% non-white  G2: 52-96% non-white  G3+G4: 2% non-white | *Gestational week:*  G1-G4: 28-32 weeks’ gestation  *Presence of co-administration of vaccines:*  Co-intervention IIV in 1 cohort study |
| Nguyen et al. 2022313  CRD42020160746  *Condition*:  Pertussis  KQ 1, KQ 1a  *Funding*:  None | Systematic Review  *Country*:  The Netherlands, Canada, Vietnam, United States, Australia, Czech Republic, Finland, Italy, Spain, Mexico, Israel, Argentina, Colombia, Brazil, Belgium, United Kingdom, New Zealand, Portland  *Search period:*  Until December 2020  PubMed or MEDLINE, Embase, and the Cochrane Library | *SR number of included studies:*  26  *N relevant studies/participants:* Pertussis vaccine vs. no vaccine: 6 RCTs (1,385 participants)  14 cohort studies (293,383 participants)  5 case-control studies (1,362 participants)  Pertussis vaccine 28–32 weeks vs pertussis vaccine 32–36 weeks vs no vaccine:  1 cohort study (154 participants)  *N Overall:*  296,285 | *Intervention group:*  G1: Tdap  *Comparison groups:*  G2: No vaccine  G3: Vaccine postpartum/before pregnancy within the prior 2 years  G4: Td  G5: TT  *Subgroup analysis:*  None | *Vaccine (sponsor):*  NR (GlaxoSmithKline or Sanofi Pasteur)  *Dose:*  NR | *Population*:  Pregnant people without any complications  *Ethnicity:*  NR | *Gestational week:*  16-38 weeks  *Presence of co-administration of vaccines:*  NR |
| Shi et al. 2025 314  CRD420251068024  *Condition*:  Pertussis  KQ 1  *Funding*:  Academic | Systematic Review  *Country*:  Netherlands, USA, Vietnam, Canada, Mali, Vietnam, Brazil, Australia, Argentina, Peru, Spain, Great Britain, multiple countries  *Search period*:  Until 16 February 2025, PubMed, Embase, and Web of Science | *SR number of included studies*  17 studies (7 RCTs, 10 case-control studies)  *N relevant studies/participants:*  Pertussis vs. Placebo (3 RCTs, n=906)  Pertussis vs. No vaccination (1 RCT, n=118; 10 case-control studies, n=2104)  Pertussis vs. TT or Td (3 RCTs,n=576)  *N Overall:*  3704 | *Intervention group*  G1: Maternal Tdap vaccine  *Comparison groups*:  G2: Placebo, no vaccine or alternative vaccine (Td or TT)  *Subgroup analysis:*  By vaccine sponsor, comparison group, timing, IgG titer | *Vaccine (sponsor):*  Tdap (GSK, Sanofi Pasteur)  *Dose*:  NR | *Population:*  Pregnant women  *Ethnicity*:  NR | *Gestational week:*  14–27 weeks (1 RCT)  18–36weeks (1 RCT)  27–36 weeks (1 RCT)  30–32 weeks (3 RCTs)  ≥30weeks (1 RCT)  Case-control studies: NR  *Presence of co-administration of vaccines*:  NR |
| Simayi et al. 2022315  PROSPERO 42021287717  *Condition*:  Pertussis  KQ 1  *Funding*:  Foundation/academic | Systematic Review  *Country*:  Netherlands, Australia, Czech Republic, Finland, Italy, Spain, America, Vietnam, Mexico, Canada,  *Search period:*  Until 8 October, 2021  PubMed, Embase, Cochrane Library, Web of Science, China National Knowledge Infrastructure and Wan Fang databases | *SR number of included studies:*  6 RCTs  *N relevant studies/participants:*  Tdap vs. no vaccine:  1 RCT (118 participants)  Tdap vs. placebo:  3 RCTs (906 participants)  Tdap vs. tetanus toxoid:  1 RCT (103 participants)  Tdap vs. tetanus and diphtheria:  1 RCT (273 participants)  *N Overall:*  1,400 | *Intervention group:*  G1: Tdap vaccine  *Comparison groups:*  G2: placebo, standard vaccine, unvaccinated  *Subgroup analysis:*  None | *Vaccine (sponsor):*  NR  *Dose:*  NR | *Population*:  People 18–45 years with uncomplicated singleton pregnancy  *Ethnicity:*  NR | *Gestational week:*  18-36 weeks  *Presence of co-administration of vaccines:*  NR |
| **RSV** | | | | | | |
| Aladijany et al. 2025 316  CRD420250651132  *Condition*:  RSV  KQ 1  *Funding*:  Academic | Systematic Review  *Country:*  Global, and countries across Europe, Asia, and LatinAmerica  *Search period:*  PubMed, ClinicalTrials.gov, FDA databases, and VAERS from May 1, 2023, to February 11, 2025 | *SR number of included studies:*  5 studies (3 RCTs, 2 Observational studies)  *N relevant studies/participants:*  NR (3 RCTs, 2 Observational studies)  *N Overall:*  19,400 | *Intervention group:*  G1: RSV vaccine  *Comparison groups:*  G2: Placebo or active control  *Subgroup analysis:*  By vaccine type | *Vaccine (sponsor):*  Abrysvo (Pfizer)  *Dose:*  1 dose (not specified) | *Population:*  Pregnant women  *Ethnicity:*  NR | *Gestational week:*  NR  *Presence of co-administration of vaccines:*  NR |
| Mapindra et al. 2024 317  CRD42023405392  *Condition:*  RSV  KQ 1  *Funding*:  Government | Systematic Review  *Country:*  USA, Chile, Argentina, South Africa, multicountry studies  *Search period:*  Until 22 February, 2023  MEDLINE and Embase | *SR number of included studies:*  6 studies  *N relevant studies/participants:*  RSV vaccine vs. placebo:  6 RCTs (12,734 participants)  *N Overall:*  12,734 | *Intervention group:*  G1: RSV vaccine  *Comparison group:*  G2: Placebo  *Subgroup analysis:*  None | *Vaccine (sponsor):*  Al(OH)3-adjuvanted  purified F protein  (Wyeth Lederle), purified F protein nanoparticle (NovaVax), Al(OH)3-adjuvanted OR unadjuvanted  bivalent purified pre-F protein (Pfizer), unadjuvanted  purified pre-F protein  (GlaxoSmithKline)  *Dose:*  1 dose (50 to 240 μg) | *Population*:  People with uncomplicated singleton pregnancy  *Ethnicity:*  NR | *Gestational week:*  24-36 weeks  *Presence of co-administration of vaccines:*  NR |
| Phijffer et al. 2024 318  NR  *Condition*:  RSV  KQ 1  *Funding*:  None | Systematic Review  *Country*:  USA and multiple countries  *Search period*:  Until 27 July 2023, Cochrane Central Register of Controlled Trials (CENTRAL), MEDLINE (Ovid), Embase (Ovid), CINAHL EBSCO , scanning of 30 journals and the proceedings of major conferences, weekly current awareness alerts for a further 44 journals plus monthly BioMed Central email alerts, U.S. National Institutes of Health Ongoing Trials Register ClinicalTrials.gov (clinicaltrials.gov/) and the WHO International Clinical Trials Registry Platform (ICTRP; apps.who.int/ trialsearch/) | *SR number of included studies:*  6 RCTs  *N relevant studies/participants:*  RSV pre-F protein vaccine vs. Placebo (4 RCTs, n=13305)  RSV F protein nanoparticle vaccine vs. Placebo (2 RCTs, n=4686)  *N Overall:*  Overall: 17,991 | *Intervention group:*  G1: RSV vaccine  *Comparison group:*  G2: Placebo  *Subgroup analysis:*  not possible | *Vaccine (sponsor):*  RSV pre-F protein subunit vaccine (GSK, Pfizer)  RSV F protein nanoparticle vaccine (Novavax)  *Dose:*  1 dose (60 to 240 µg) | *Population:*  Pregnant women  *Ethnicity:*  NR | *Gestational week:*  28 to 34 weeks' gestation (3 RCTs)  24 to 34 weeks' gestation (1 RCT)  28 to 36 weeks' gestation (1 RCT)  33 to 35 weeks' gestation (1 RCT)  *Presence of co-administration of vaccines:*  NR |

*studies reporting on efficacy outcomes, number of studies and participants evaluating immunogenicity and safety outcomes not reported

**Abbreviations**: COVID-19 = Coronavirus disease of 2019; G1 = Group 1; G2 = Group 2; IIV = Inactivated influenza vaccine; IPV = inactivated polio vaccine; KQ = key question; N = Number; NH = Northern Hemisphere recommended strains; NR = not reported; QIIV = Quadrivalent inactivated influenza vaccine; RCT = randomised controlled trial; RSV = Respiratory syncytial virus ; SH = Southern Hemisphere recommended strains; Tdap = Tetanus, diphtheria and pertussis vaccine; Td = Tetanus–diphtheria vaccine; TIV = Trivalent influenza vaccine; TIIV = Trivalent inactivated influenza vaccine, TT = Tetanus toxoid vaccine; vs = versus;

## Supplementary information 6: Outcomes extracted from the selected systematic reviews

| **Author, Year,**  **Registry Number,**  **Condition,**  **KQ**  **Sponsor** | **Maternal efficacy/effectiveness outcomes** | **Infant efficacy/effectiveness outcomes** | **Maternal safety outcomes** | **Infant safety outcomes** | **Maternal immunogenicity outcomes** | **Neonatal/child immunogenicity outcomes** |
| --- | --- | --- | --- | --- | --- | --- |
| **COVID-19** | | | | | | |
| Ciapponi et al. 2024 204  CRD42021281290  *Condition*:  COVID-19  KQ 1  *Funding*:  Foundation/non-profit professional organization | - Severe or hospitalized COVID-19 in mothers (7 studies)  - Symptomatic COVID-19 in mothers (NR)  - Virologically confirmed SARSCoV-2 infection in mothers (NR) | - Severe or hospitalized COVID-19 in infants (3 studies)  - Virologically confirmed SARSCoV-2 infection in infants (NR) | - Antenatal bleeding (4 studies)  - Caesarean delivery (12 studies)  - Chorioamnionitis (4 studies)  - Ectopic pregnancy (1 study)  - Emergency caesarean (5 studies)  - Fetal growth retardation (or restriction) (5 studies)  - Gestational diabetes (8 studies)  - Hypertensive disorders of pregnancy (10 studies)  - Instrumental delivery (vacuum/forceps) (6 studies)  - Maternal death (3 studies)  - Maternal ICU admission (3 studies)  - Miscarriage / Abortion (5 studies)  - Non-reassuring fetal status (1 study)  - Oligohydramnios (4 studies)  - Placental abruption (6 studies)  - Polyhydramnios (3 studies)  - Postpartum hemorrhage (8 studies)  - Preeclampsia /eclampsia (5 studies)  - Previous placenta (1 study)  - Stillbirth (11 studies)  - Adverse events following immunisation (2 studies)  - Anaphylaxis (4 studies)  - Chills (10 studies)  - Diarrhea (6 studies)  - Fatigue (18 studies)  - Fever (23 studies)  - Headache (21 studies)  - Injection site reactions (11 studies)  - Joint Pain (11 studies)  - Lymphadenopathy (3 studies)  - Myalgia (16 studies)  - Myocarditis (1 study)  - Rash (6 studies)  - Seizure (1 study)  - Serious adverse events (4 studies)  - Vomiting (8 studies) | - Any congenital malformation (8 studies)  - Apgar score <7 at 5 minutes (9 studies)  - Birth asphyxia (2 studies)  - Gestational age at delivery <28 weeks (1 study)  - Gestational age at delivery <32 weeks (5 studies)  - Gestational age at delivery <37 weeks (21 studies)  - Gestational age at delivery 32- 36 weeks (1 study)  - Heart malformations (1 study)  - High birthweight (1 study)  - Hypoglycemia (1 study)  - Hypothermia (1 study)  Iatrogenic preterm birth (2 studies)  - Infant death (1 study)  - Intracranial hemorrhage (1 study)  - Low birth weight (2 studies)  - Major heart malformations (1 study)  - Meconium aspiration (1 study)  - Neonatal death (1 study)  - Neonatal encephalopathy (1 study)  - Neonatal invasive ventilation (1 study)  - NICU hospitalization (14 studies)  - Perinatal death (during delivery) (1 study)  - Postneonatal (>28 days after birth) all cause hospitalizations (1 study)  - Postneonatal hospitalization (1 study)  - Respiratory distress in the newborn (1 study)  - Seizure (1 study)  - Sepsis (1 study)  - Small for gestational age (12 studies)  - Spontaneous preterm (3 studies)  - Transient tachypnea (1 study)  - Very low birth weight (1 study) | NR | NR |
| Fernández-García et al. 202462  NA  *Condition*:  COVID-19  KQ 1  *Funding*:  Government, Foundation/non-profit professional organisation | - Maternal infection (4 test-negative studies, 3 cohort studies)  - Severe COVID-19 disease (1 test-negative studies, 3 cohort studies)  - Maternal hospital admission (2 test-negative studies, 3 cohort studies) | - Infant infection (1 test-negative studies, 2 cohort studies)  - Admission to neonatal intensive care unit (4 cohort studies)  - Neonatal death (1 cohort study) | - Fever (14 studies, design NR)  - Headache (13 studies, design NR)  - Myalgia (11 studies, design NR)  - Fatigue (10 studies, design NR)  - Pain at injection site (8 studies, design NR)  - Maternal death (9 cohort studies)  - Miscarriage (4 cohort studies)  - Caesarean section (6 cohort studies)  - Postpartum haemorrhage (5 cohort studies)  - Gestational diabetes (1 cohort study)  - Hypertensive disorders (5 cohort studies) | - Stillbirth (2 cohort studies)  -Low 5-min APGAR score <7 (4 cohort studies)  - Small for gestational age (6 cohort studies)  - Preterm birth (5 cohort studies) | NR | NR |
| Lei et al. 2024 285  NR  *Condition*:  COVID-19  KQ 1  *Funding*:  Foundation/non-profit professional organization | - SARS-CoV-2 infection in mothers (24 studies)  - Maternal hospitalization (8 studies)  - Severe/critical maternal outcomes (11 studies) | - SARS-CoV-2 infection in infants (7 studies)  - Neonatal hospitalization (6 studies)  - NICU/PICU (27 studies) | - Abortion (17 studies)  - Postpartum hemorrhage (19 studies)  - Intrauterine fetal death (10 studies)  - Premature rupture of membranes (9 studies)  - Abnormality of placenta (14 studies) | - Preterm birth (45 studies)  - Neonatal death (10 studies)  - Stillbirth (22 studies) | NR | NR |
| Wang et al. 2024193  *Condition*:  COVID-19  KQ 1, KQ 1a  *Funding*:  None | NR | NR | - Miscarriage (1 cross-sectional, 2 case-control study, 4 cohort studies)  - Caesarean delivery (15 cohort studies, 1 case-control study)  - Emergency caesarean delivery (2 studies, design NR)  - Medically indicated term birth (4 studies, design NR)  - Placental abruption (3 cohort study)  - Postpartum haemorrhage (13 cohort studies, 1 case-control study)  - Preeclampsia (5 cohort studies, 1 case-control study) | - Still birth (11 cohort studies, 2 case-control studies)  - Very preterm birth (<32 weeks) (5 cohort studies, 1 case-control study)  - Preterm birth (<37 weeks) (24 cohort studies, 1 case-control study)  - Spontaneous preterm birth (5 cohort studies, 1 case-control study)  - Meconium-based amniotic fluid (1 cohort study)  - SGA (14 cohort studies)  - 5 min APGAR less than 7 (9 cohort studies)  - LBW (<2500g) (6 cohort studies)  - VLBW (<1500g) (1 cohort study)  - NICU admission (7 cohort studies, 1 case-control study)  - Respiratory complications (2 cohort studies) | NR | NR |
| **Influenza** | | | | | | |
| Bansal et al. 2021309  NR  *Condition*:  Influenza  KQ 1, KQ1a  *Funding*:  Government, Academic | - Maternal vaccine efficacy against infection (4 RCTs)  - Hospitalisation rates for influenza (2 screening methods studies, 1 case-control study)  - Rates of febrile illness (2 cohort studies) | - Infant vaccine efficacy against infection (1 case-control study, 3 cohort studies, 1 RCT)  - Rates of febrile illness (2 cohort studies) | - Adverse events, not defined (1 study, design NR) | - Low birth weight (1 cohort study)  - Gestational age (1 cohort study)  - Preterm birth (1 cohort study, 1 SR) | -GMTs  ->2.5-fold increase in geometric mean HI titres  - >70% seroprotection (achieving HI titre ≥40), (7 studies; 2 cohort studies, 5 NR) | -GMTs  ->2.5-fold increase in geometric mean HI titres  - >70% seroprotection (achieving HI titre ≥40), (8 studies: 1 RCT, 7 NR) |
| Wolfe et al. 2023307  CRD42020159030  *Condition*:  Influenza  KQ 1  *Funding*:  Government | NR | NR | - Non- obstetric severe adverse events (3 cohort studies)  - Spontaneous abortion (5 studies) | - Stillbirth (7 cohort studies)  - Preterm birth (15 cohort studies)  - SGA (13 cohort studies)  - LBW (11 cohort studies)  - Congenital anomalies (2 cohort studies, 2 case-control studies) | NR | NR |
| **Pertussis** | | | | | | |
| Andersen et al. 2022310  CRD42020181142  *Condition*:  Pertussis  KQ 1  *Funding*:  None | NR | NR | - Non-pertussis infection (1 controlled cohort study, 1 RCT)  - Spontaneous abortion (1 controlled cohort study, 1 RCT)  - Chorioamnionitis (6 controlled cohort studies, 1 RCT)  - Maternal death (2 controlled cohort studies, 1 RCT) | - Non-pertussis infections in infants (3 controlled cohort studies, 4 RCTs)  - Neonatal death (2 controlled cohort studies, 2 RCTs)  - Stillbirth (4 controlled cohort studies, 2 RCTs) | NR | NR |
| De Weerdt et al. 2024 311  CRD42023459133  *Condition*:  Pertussis  KQ 1a  *Funding*:  Foundation/non-profit professional organization | NR | - Infant ARI at <2 months of age (accounting for potentially misdiagnosed and uncaptured pertussis cases) (NR) | - Abortion (NR) - Stillbirth (NR) - Live infants (NR) - Preeclampsia (NR) - Chorioamnionitis (NR) - Preterm delivery (NR) - Preterm labour (NR) - Postpartum hemorrhage (NR) - Acute adverse events (anaphylaxis, fever, limb pain/ swelling, etc.) (NR) | - Small for gestational age (NR) - Low birth weight (NR) - Preterm birth (NR) - Growth problems in utero/infancy (NR) - Major birth defects (NR) - NICU admission (NR) - Respiratory distress (NR) - Neonatal sepsis (NR) - Transient tachypnea of the newborn (NR) | IgG titers at delivery against PT, FHA, PRN and FIM (NR) | - IgG titers at delivery against PT, FHA, PRN and FIM (cord blood at delivery, infants pre-immunization) (NR)  - TTR of IgG antibodies against PT, FHA and PRN (NR)  - Avidity index of IgG anti-PT (NR) |
| Gidengil et al. 2021 312,319  CRD42020180089  *Condition*:  Influenza, Pertussis  KQ 1, KQ 1a  *Funding*:  NR | Pertussis  NR  Influenza  NR | Pertussis  NR  Influenza  NR | Pertussis  - Maternal autoimmune disease (1 RCT)  - Maternal cardiovascular events (3 RCTs, 3 cohort studies)  - Maternal death (2 RCTs, 2 cohort studies)  - Maternal diabetes (1 RCT, 3 cohort studies)  - Eclampsia/preeclampsia (2 RCTs, 4 cohort studies)  - Maternal encephalitis/encephalopathy (1 cohort study)  - Maternal Guillain-Barré syndrome (1 cohort study)  - Preterm labour (3 RCTs, 7 cohort studies)  - Maternal reproductive system events (2 RCTs, 1 cohort study)  - Maternal seizures (1 cohort study)  - Spontaneous abortion (2 cohort studies)  - Adverse events (1 cohort study) | Pertussis  - Autism in infants (1 cohort study)  - ADHD in infants (1 cohort study)  - Birth defects (3 RCTs, 5 cohort studies)  - Cardiovascular events in infants (2 RCTs, 2 cohort studies)  - Death in infants (1 RCT, 2  cohort studies)  - Stillbirth (2 RCTs, 4 cohort studies)  - Encephalitis/ encephalopathy in infants (1 RCT, 3 cohort studies)  - Intussusception in infants (1 RCT)  - Meningitis in infants (1 RCT)  - Seizure in infants (3 cohort studies)  - Stroke in infants (1 cohort studies)  - Low birthweight (1 cohort study)  - Preterm birth (1 cohort study)  - SGA (1 cohort study)  - Large for gestational age (1  cohort study)  - Respiratory distress syndrome (1 cohort study)  - Transient tachypnea of newborn (1 cohort study)  -Tachycardia or bradycardia (1 cohort study)  - Hemolytic disease (1 cohort study)  - Neonatal jaundice (1 cohort study)  - Anaemia (1 cohort study)  - Syndrome of infant of mother with gestational diabetes (1 cohort study)  - Hypoglycaemia in infants (1 cohort study) | Pertussis  NR  Influenza  NR | Pertussis  NR  Influenza  NR |
| Nguyen et al. 2022313  CRD42020160746  *Condition*:  Pertussis  KQ 1, KQ 1a  *Funding*:  None | NR | - Incidence rates of pertussis (6 RCTs, 13 cohort studies, 5 case-control studies) | - Severe adverse events (5 RCTs, 2 cohort studies) | - Severe adverse events (4 RCTs, 1 cohort study) | NR | -Pertussis IgG before primary immunisation (6 RCTs, 3 cohort studies)  -Anti-PT (6 RCTs, 3 cohort studies)  - Anti-FHA (5 RCTs, 2 cohort studies)  -Anti-PRN IgG (6 RCTs, 3 cohort studies) |
| Shi et al. 2025 314  CRD420251068024  *Condition*:  Pertussis  KQ 1  *Funding*:  Academic | NR | - Infant vaccine efficacy and effectiveness (pertussis infection) | - Serious adverse events (maternal death, gestational hypertension, severe infections, preeclampsia, postpartum hemorrhage, and preterm birth) (NR) | - Serious adverse events (neonatal death, congenital cardiac defects, respiratory distress syndrome, severe pneumonia, hyperbilirubinemia requiring phototherapy, febrile convulsions, dehydration, and hypoglycemia necessitating medical intervention) (NR) | - NR | Cord blood and before first vaccinaton:  geometric mean concentrations of   - Anti-PT (NR) - Anti-FHA (NR) - Anti-PRN (NR) - IgG antibodies (NR) |
| Simayi et al. 2022315  PROSPERO 42021287717  *Condition*:  Pertussis  KQ 1  *Funding*:  NR | NR | NR | Severe Adverse Events (3 RCTs) | Severe Adverse Events OR (95% CI) (from 3RCTs) | NR | -Anti-PRN pooled (5 RCTs)  -Anti-FHA pooled (4 RCTs)  -Anti-PT pooled (5 RCTs) |
| **RSV** | | | | | | |
| Aladijany et al. 2025 316  CRD420250651132  *Condition*:  RSV  KQ 1  *Funding*:  Academic | NR | - RSV-related hospitalization  - (Lab)-confirmed RSV infection and illness | Adverse events | NR | Maternal antibody transfer (not further specified) | GMT titer (not further specified) |
| Mapindra et al. 2024  317  CRD42023405392  *Condition:*  RSV  KQ 1  *Funding*:  Government | NR | - Medically attended RSV infection (3 RCTs)  - RSV-associated hospitalisations (3 RCTs) | - Adverse events (NR)  *Solicited localised adverse events:*  - Local pain (6 RCTs)  - Local swelling (4 RCTs)  - Local erythema (5 RCTs)  *Systemic solicited adverse events:*  - Fatigue (5 RCTs)  - Headache (5 RCTs)  - Vomiting (4 RCTs)  - General muscle pain (4 RCTs)  - General joint pain (4 RCTs)  -Unsolicited adverse events (NR)  - Unsolicited severe adverse events (NR)  -Unsolicited adverse events of special interest (NR) | NR | -Antibodies at time of delivery (Nab-A, Nab-B, F-IgG, PCA) (4 RCTs) | -Cord blood antibodies (Nab-A, Nab-B, F-IgG, PCA) (4 RCTs) |
| Phijffer et al. 2024 318  NR  *Condition*:  RSV  KQ 1  *Funding*:  None | NR | Infant hospitalisation with laboratory-confirmed RSV disease (4 RCTs) | - Intrauterine growth restriction (4 RCTs)  - Stillbirth (5 RCTs)  - Maternal death (3 RCTs) | - Preterm birth (6 RCTs)  - Congenital abnormalities (4 RCTs)  - Infant death (6 RCTs) | NR | NR |

**Abbreviations**: ADHD = Attention deficit hyperactivity disorder; Anti-FHA = Antifilamentous hemagglutinin; Anti-PRN = Antipertactin; Anti-PT = Antipertussis toxin; APGAR = Appearance, pulse, grimace, activity, and respiration; COVID-19 = Coronavirus Disease of 2019; GMT = Geometric mean titre; HI = Hemagglutinin inhibition; (F-)IgG = F protein specific Immunoglobulin G; IIV = Inactivated influenza vaccination; KQ = Key question; LBW = Low birth weight; NICU = Neonatal intensive care unit; Nab = Neutralising antibodies; NR = Not reported; PCA = Palivizumab competitive antibody; RCT = Randomised controlled trial; SGA = Small for gestational age; VLBW = Very low birth weight

## Supplementary information 7: Studies included for maternal influenza vaccination

220,235,250,261,307,309,312,319-501

220 Deese, J. *et al.* Systematic Literature Review of Maternal Antibodies in Human Milk Following Vaccination During Pregnancy or Lactation Tetanus, Pertussis, Influenza and COVID-19. *The Pediatric infectious disease journal* **44**, S38-S42 (2025). https://doi.org:10.1097/INF.0000000000004634

235 Chittajallu, L. V. S., Kaku, R., Kondadasula, P., Lim, J. Y. & Zhumabekova, A. Safety and Efficacy of Vaccines During Pregnancy: A Systematic Review. *Cureus* **17**, e77176 (2025). https://doi.org:10.7759/cureus.77176

250 Choi, Y. J. *et al.* The risk of pregnancy-related adverse outcomes after COVID-19 vaccination: Propensity score-matched analysis with influenza vaccination. *Vaccine* **44**, 126506 (2024). https://doi.org:10.1016/j.vaccine.2024.126506

261 Roque-Pereira, L. *et al.* Comparison of Adverse Events in Pregnant Persons Receiving COVID-19 and Influenza Vaccines: A Disproportionality Analysis Using Combined Data from US VAERS and EudraVigilance Spontaneous Report Databases. *Drug Saf.* **48**, 1127-1139 (2025). https://doi.org:10.1007/s40264-025-01561-6

307 Wolfe, D. M. *et al.* Safety of influenza vaccination during pregnancy: a systematic review. *BMJ Open* **13**, e066182 (2023). https://doi.org:10.1136/bmjopen-2022-066182

309 Bansal, A., Trieu, M. C., Mohn, K. G. I. & Cox, R. J. Safety, Immunogenicity, Efficacy and Effectiveness of Inactivated Influenza Vaccines in Healthy Pregnant Women and Children Under 5 Years: An Evidence-Based Clinical Review. *Front. Immunol.* **12**, 744774 (2021). https://doi.org:10.3389/fimmu.2021.744774

312 Gidengil, C. *et al.* *Safety of Vaccines Used for Routine Immunization in the United States: An Update*. (2021).

319 Gidengil, C. *et al.* Safety of vaccines used for routine immunization in the United States: An updated systematic review and meta-analysis. *Vaccine* **39**, 3696-3716 (2021). https://doi.org:10.1016/j.vaccine.2021.03.079

320 Adedinsewo, D. A. *et al.* Impact of maternal characteristics on the effect of maternal influenza vaccination on fetal outcomes. *Vaccine* **31**, 5827-5833 (2013). https://doi.org:10.1016/j.vaccine.2013.09.071

321 Ahrens, K. A., Louik, C., Kerr, S., Mitchell, A. A. & Werler, M. M. Seasonal influenza vaccination during pregnancy and the risks of preterm delivery and small for gestational age birth. *Paediatr. Perinat. Epidemiol.* **28**, 498-509 (2014). https://doi.org:10.1111/ppe.12152

322 Arriola, C. S. *et al.* Association of influenza vaccination during pregnancy with birth outcomes in Nicaragua. *Vaccine* **35**, 3056-3063 (2017). https://doi.org:10.1016/j.vaccine.2017.04.045

323 Avalos, L. A. *et al.* Trivalent inactivated influenza vaccine (IIV3) during pregnancy and six-month infant development. *Vaccine* **38**, 2326-2332 (2020). https://doi.org:10.1016/j.vaccine.2020.01.059

324 Baum, U., Leino, T., Gissler, M., Kilpi, T. & Jokinen, J. Perinatal survival and health after maternal influenza A(H1N1)pdm09 vaccination: A cohort study of pregnancies stratified by trimester of vaccination. *Vaccine* **33**, 4850-4857 (2015). https://doi.org:10.1016/j.vaccine.2015.07.061

325 Beau, A. B. *et al.* Pandemic A/H1N1 influenza vaccination during pregnancy: a comparative study using the EFEMERIS database. *Vaccine* **32**, 1254-1258 (2014). https://doi.org:10.1016/j.vaccine.2014.01.021

326 Becerra-Culqui, T. A., Getahun, D., Chiu, V., Sy, L. S. & Tseng, H. F. Prenatal Influenza Vaccination or Influenza Infection and Autism Spectrum Disorder in Offspring. *Clin. Infect. Dis.* **75**, 1140-1148 (2022). https://doi.org:10.1093/cid/ciac101

327 Benowitz, I., Esposito, D. B., Gracey, K. D., Shapiro, E. D. & Vazquez, M. Influenza vaccine given to pregnant women reduces hospitalization due to influenza in their infants. *Clin. Infect. Dis.* **51**, 1355-1361 (2010). https://doi.org:10.1086/657309

328 Bischoff, A. L. *et al.* Airway mucosal immune-suppression in neonates of mothers receiving A(H1N1)pnd09 vaccination during pregnancy. *Pediatr. Infect. Dis. J.* **34**, 84-90 (2015). https://doi.org:10.1097/INF.0000000000000529

329 Black, S. B. *et al.* Effectiveness of influenza vaccine during pregnancy in preventing hospitalizations and outpatient visits for respiratory illness in pregnant women and their infants. *Am. J. Perinatol.* **21**, 333-339 (2004). https://doi.org:10.1055/s-2004-831888

330 Blanchard-Rohner, G. *et al.* Influenza vaccination given at least 2 weeks before delivery to pregnant women facilitates transmission of seroprotective influenza-specific antibodies to the newborn. *Pediatr. Infect. Dis. J.* **32**, 1374-1380 (2013). https://doi.org:10.1097/01.inf.0000437066.40840.c4

331 Bratton, K. N., Wardle, M. T., Orenstein, W. A. & Omer, S. B. Maternal influenza immunization and birth outcomes of stillbirth and spontaneous abortion: a systematic review and meta-analysis. *Clin. Infect. Dis.* **60**, e11-19 (2015). https://doi.org:10.1093/cid/ciu915

332 Cantu, J. *et al.* Selective uptake of influenza vaccine and pregnancy outcomes. *J. Matern. Fetal Neonatal Med.* **26**, 1207-1211 (2013). https://doi.org:10.3109/14767058.2013.775419

333 Chambers, C. D. *et al.* Risks and safety of pandemic H1N1 influenza vaccine in pregnancy: birth defects, spontaneous abortion, preterm delivery, and small for gestational age infants. *Vaccine* **31**, 5026-5032 (2013). https://doi.org:10.1016/j.vaccine.2013.08.097

334 Chambers, C. D. *et al.* Safety of the 2010-11, 2011-12, 2012-13, and 2013-14 seasonal influenza vaccines in pregnancy: Birth defects, spontaneous abortion, preterm delivery, and small for gestational age infants, a study from the cohort arm of VAMPSS. *Vaccine* **34**, 4443-4449 (2016). https://doi.org:10.1016/j.vaccine.2016.06.054

335 Chao, A. *et al.* Seroprevalence of influenza A H1N1 and seroconversion of mothers and infants induced by a single dose of monovalent vaccine. *Taiwan. J. Obstet. Gynecol.* **52**, 356-359 (2013). https://doi.org:10.1016/j.tjog.2013.06.002

336 Chao, A. S. *et al.* Seropositivity of influenza A H1NI in mothers and infants following maternal vaccination with trivalent seasonal influenza vaccine after the 2009 pandemic. *Taiwan. J. Obstet. Gynecol.* **56**, 37-40 (2017). https://doi.org:10.1016/j.tjog.2016.08.007

337 Chavant, F. *et al.* The PREGVAXGRIP study: a cohort study to assess foetal and neonatal consequences of in utero exposure to vaccination against A(H1N1)v2009 influenza. *Drug Saf.* **36**, 455-465 (2013). https://doi.org:10.1007/s40264-013-0030-1

338 Cleary, B. J., Rice, U., Eogan, M., Metwally, N. & McAuliffe, F. 2009 A/H1N1 influenza vaccination in pregnancy: uptake and pregnancy outcomes - a historical cohort study. *Eur. J. Obstet. Gynecol. Reprod. Biol.* **178**, 163-168 (2014). https://doi.org:10.1016/j.ejogrb.2014.04.015

339 Clements, T. *et al.* Update on Transplacental Transfer of IgG Subclasses: Impact of Maternal and Fetal Factors. *Front. Immunol.* **11**, 1920 (2020). https://doi.org:10.3389/fimmu.2020.01920

340 Coenders, A. *et al.* Adjuvanted vaccines in pregnancy: no evidence for effect of the adjuvanted H1N1/09 vaccination on occurrence of preeclampsia or intra-uterine growth restriction. *Eur. J. Obstet. Gynecol. Reprod. Biol.* **187**, 14-19 (2015). https://doi.org:10.1016/j.ejogrb.2015.01.011

341 Conlin, A. M. S. *et al.* A follow-up comparative safety analysis of pandemic H1N1 vaccination during pregnancy and risk of infant birth defects among U.S. military mothers. *Vaccine* **36**, 2855-2860 (2018). https://doi.org:10.1016/j.vaccine.2018.03.061

342 Conlin, A. M. S., Bukowinski, A. T., Sevick, C. J., DeScisciolo, C. & Crum-Cianflone, N. F. Safety of the pandemic H1N1 influenza vaccine among pregnant U.S. military women and their newborns. *Obstet. Gynecol.* **121**, 511-518 (2013). https://doi.org:10.1097/AOG.0b013e318280d64e

343 Cowling, B. J. *et al.* Maternal Antibodies Against Influenza in Cord Blood and Protection Against Laboratory-Confirmed Influenza in Infants. *Clin. Infect. Dis.* **71**, 1741-1748 (2020). https://doi.org:10.1093/cid/ciz1058

344 Cuningham, W. *et al.* Optimal timing of influenza vaccine during pregnancy: A systematic review and meta-analysis. *Influenza Other Respi. Viruses* **13**, 438-452 (2019). https://doi.org:10.1111/irv.12649

345 Dabrera, G. *et al.* Effectiveness of seasonal influenza vaccination during pregnancy in preventing influenza infection in infants, England, 2013/14. *Euro Surveillance: Bulletin Europeen sur les Maladies Transmissibles = European Communicable Disease Bulletin* **19**, 20959 (2014). https://doi.org:10.2807/1560-7917.es2014.19.45.20959

346 de Bruin, O. *et al.* Are maternal vaccines effective and safe for mothers and infants? A systematic review and meta-analysis of randomised controlled trials. *BMJ Global Health* **8**, 10 (2023). https://doi.org:10.1136/bmjgh-2023-012376

347 Demicheli, V. *et al.* Vaccines for preventing influenza in healthy adults. *Cochrane Database Syst. Rev.*, CD001269 (2014). https://doi.org:10.1002/14651858.CD001269.pub5

348 Dodds, L. *et al.* The association between influenza vaccine in pregnancy and adverse neonatal outcomes. *Journal of Obstetrics & Gynaecology Canada: JOGC* **34**, 714-720 (2012). https://doi.org:10.1016/S1701-2163(16)35336-1

349 Donahue, J. G. *et al.* Association of spontaneous abortion with receipt of inactivated influenza vaccine containing H1N1pdm09 in 2010-11 and 2011-12. *Vaccine* **35**, 5314-5322 (2017). https://doi.org:10.1016/j.vaccine.2017.06.069

350 Donahue, J. G. *et al.* Inactivated influenza vaccine and spontaneous abortion in the Vaccine Safety Datalink in 2012-13, 2013-14, and 2014-15. *Vaccine* **37**, 6673-6681 (2019). https://doi.org:10.1016/j.vaccine.2019.09.035

351 Duque, J., Howe, A. S., Azziz-Baumgartner, E. & Petousis-Harris, H. Multi-decade national cohort identifies adverse pregnancy and birth outcomes associated with acute respiratory illness hospitalisations during the influenza season. *Influenza Other Respi. Viruses* **17**, e13063 (2023). https://doi.org:10.1111/irv.13063

352 Eick, A. A. *et al.* Maternal influenza vaccination and effect on influenza virus infection in young infants. *Arch. Pediatr. Adolesc. Med.* **165**, 104-111 (2011). https://doi.org:10.1001/archpediatrics.2010.192

353 Fabiani, M. *et al.* A/H1N1 pandemic influenza vaccination: A retrospective evaluation of adverse maternal, fetal and neonatal outcomes in a cohort of pregnant women in Italy. *Vaccine* **33**, 2240-2247 (2015). https://doi.org:10.1016/j.vaccine.2015.03.041

354 Fell, D. B. *et al.* Fetal death and preterm birth associated with maternal influenza vaccination: systematic review. *BJOG* **122**, 17-26 (2015). https://doi.org:10.1111/1471-0528.12977

355 Fell, D. B. *et al.* Effectiveness of maternal influenza vaccination during pregnancy against laboratory-confirmed seasonal influenza among infants under 6 months of age in Ontario, Canada. *J. Infect. Dis.* **29**, 29 (2023). https://doi.org:10.1093/infdis/jiad539

356 Fell, D. B. *et al.* H1N1 influenza vaccination during pregnancy and fetal and neonatal outcomes. *Am. J. Public Health* **102**, e33-40 (2012). https://doi.org:10.2105/AJPH.2011.300606

357 Fell, D. B. *et al.* Infant Respiratory Outcomes Associated with Prenatal Exposure to Maternal 2009 A/H1N1 Influenza Vaccination. *PLoS ONE [Electronic Resource]* **11**, e0160342 (2016). https://doi.org:10.1371/journal.pone.0160342

358 Fisher, B. M. *et al.* Pandemic influenza A H1N1 2009 infection versus vaccination: a cohort study comparing immune responses in pregnancy. *PLoS ONE [Electronic Resource]* **7**, e33048 (2012). https://doi.org:10.1371/journal.pone.0033048

359 Foo, D., Sarna, M., Pereira, G., Moore, H. C. & Regan, A. K. Longitudinal, population-based cohort study of prenatal influenza vaccination and influenza infection in childhood. *Vaccine* **40**, 656-665 (2022). https://doi.org:10.1016/j.vaccine.2021.11.084

360 Foo, D., Sarna, M., Pereira, G., Moore, H. C. & Regan, A. K. Maternal influenza vaccination and child mortality: Longitudinal, population-based linked cohort study. *Vaccine* **40**, 3732-3736 (2022). https://doi.org:10.1016/j.vaccine.2022.05.030

361 Foo, D., Sarna, M., Pereira, G., Moore, H. C. & Regan, A. K. Prenatal influenza vaccination and allergic and autoimmune diseases in childhood: A longitudinal, population-based linked cohort study. *PLoS Medicine / Public Library of Science* **19**, e1003963 (2022). https://doi.org:10.1371/journal.pmed.1003963

362 Foo, D., Sarna, M., Pereira, G., Moore, H. C. & Regan, A. K. Association between maternal influenza vaccination and neurodevelopmental disorders in childhood: a longitudinal, population-based linked cohort study. *Arch. Dis. Child.* **108**, 647-653 (2023). https://doi.org:10.1136/archdischild-2022-324269

363 Foo, D. Y. P. *et al.* Early Childhood Health Outcomes Following In Utero Exposure to Influenza Vaccines: A Systematic Review. *Pediatrics* **146**, 08 (2020). https://doi.org:10.1542/peds.2020-0375

364 France, E. K. *et al.* Impact of maternal influenza vaccination during pregnancy on the incidence of acute respiratory illness visits among infants. *Arch. Pediatr. Adolesc. Med.* **160**, 1277-1283 (2006). https://doi.org:10.1001/archpedi.160.12.1277

365 Galvao, T. F. *et al.* Influenza vaccination in pregnant women: a systematic review. *ISRN Preventive Medicine* **2013**, 879493 (2013). https://doi.org:10.5402/2013/879493

366 Getahun, D. *et al.* Association between seasonal influenza vaccination with pre- and postnatal outcomes. *Vaccine* **37**, 1785-1791 (2019). https://doi.org:10.1016/j.vaccine.2019.02.019

367 Giles, M. L., Davey, M. A. & Wallace, E. M. Associations Between Maternal Immunisation and Reduced Rates of Preterm Birth and Stillbirth: A Population Based Retrospective Cohort Study. *Front. Immunol.* **12**, 704254 (2021). https://doi.org:10.3389/fimmu.2021.704254

368 Giles, M. L., Krishnaswamy, S., Macartney, K. & Cheng, A. The safety of inactivated influenza vaccines in pregnancy for birth outcomes: a systematic review. *Hum. Vaccin. Immunother.* **15**, 687-699 (2019). https://doi.org:10.1080/21645515.2018.1540807

369 Glover, C., Crawford, N., Leeb, A., Wood, N. & Macartney, K. Active SMS-based surveillance of adverse events following immunisation with influenza and pertussis-containing vaccines in Australian pregnant women using AusVaxSafety. *Vaccine* **38**, 4892-4900 (2020). https://doi.org:10.1016/j.vaccine.2020.04.056

370 Goldman, G. S. Comparison of VAERS fetal-loss reports during three consecutive influenza seasons: was there a synergistic fetal toxicity associated with the two-vaccine 2009/2010 season? *Hum. Exp. Toxicol.* **32**, 464-475 (2013). https://doi.org:10.1177/0960327112455067

371 Gunatilaka, A., Rolnik, D. L. & Giles, M. L. Protective effect of maternal immunization on birth outcomes: A data linkage study. *Int. J. Gynaecol. Obstet.* **162**, 51-57 (2023). https://doi.org:10.1002/ijgo.14774

372 Gunnes, N. *et al.* Seasonal and pandemic influenza during pregnancy and risk of fetal death: A Norwegian registry-based cohort study. *Eur. J. Epidemiol.* **35**, 371-379 (2020). https://doi.org:10.1007/s10654-020-00600-z

373 Haberg, S. E. *et al.* Risk of fetal death after pandemic influenza virus infection or vaccination. *N. Engl. J. Med.* **368**, 333-340 (2013). https://doi.org:10.1056/NEJMoa1207210

374 Hansen, K. P. *et al.* Does Influenza Vaccination during Pregnancy Have Effects on Non-Influenza Infectious Morbidity? A Systematic Review and Meta-Analysis of Randomised Controlled Trials. **9**, 08 (2021). https://doi.org:10.3390/vaccines9121452

375 Heikkinen, T. *et al.* Safety of MF59-adjuvanted A/H1N1 influenza vaccine in pregnancy: a comparative cohort study. *Am. J. Obstet. Gynecol.* **207**, 177.e171-178 (2012). https://doi.org:10.1016/j.ajog.2012.07.007

376 Huang, W. T. *et al.* Adverse events following pandemic A (H1N1) 2009 monovalent vaccines in pregnant women--Taiwan, November 2009-August 2010. *PLoS ONE [Electronic Resource]* **6**, e23049 (2011). https://doi.org:10.1371/journal.pone.0023049

377 Huang, W. T., Tang, F. W., Yang, S. E., Chih, Y. C. & Chuang, J. H. Safety of inactivated monovalent pandemic (H1N1) 2009 vaccination during pregnancy: a population-based study in Taiwan. *Vaccine* **32**, 6463-6468 (2014). https://doi.org:10.1016/j.vaccine.2014.09.054

378 Hviid, A., Svanstrom, H., Molgaard-Nielsen, D. & Lambach, P. Association Between Pandemic Influenza A(H1N1) Vaccination in Pregnancy and Early Childhood Morbidity in Offspring. *JAMA Pediatrics* **171**, 239-248 (2017). https://doi.org:10.1001/jamapediatrics.2016.4023

379 Irving, S. A. *et al.* Trivalent inactivated influenza vaccine and spontaneous abortion. *Obstet. Gynecol.* **121**, 159-165 (2013). https://doi.org:10.1097/aog.0b013e318279f56f

380 Jarvis, J. R., Dorey, R. B., Warricker, F. D. M., Alwan, N. A. & Jones, C. E. The effectiveness of influenza vaccination in pregnancy in relation to child health outcomes: Systematic review and meta-analysis. *Vaccine* **38**, 1601-1613 (2020). https://doi.org:10.1016/j.vaccine.2019.12.056

381 Jeong, S., Jang, E. J., Jo, J. & Jang, S. Effects of maternal influenza vaccination on adverse birth outcomes: A systematic review and Bayesian meta-analysis. *PLoS ONE [Electronic Resource]* **14**, e0220910 (2019). https://doi.org:10.1371/journal.pone.0220910

382 Kallen, B. & Olausson, P. O. Vaccination against H1N1 influenza with Pandemrix( R) during pregnancy and delivery outcome: a Swedish register study. *BJOG* **119**, 1583-1590 (2012). https://doi.org:10.1111/j.1471-0528.2012.03470.x

383 Katz, J. *et al.* Nutritional status of infants at six months of age following maternal influenza immunization: A randomized placebo-controlled trial in rural Nepal. *Vaccine* **35**, 6743-6750 (2017). https://doi.org:10.1016/j.vaccine.2017.09.095

384 Katz, J. *et al.* Impact of Timing of Influenza Vaccination in Pregnancy on Transplacental Antibody Transfer, Influenza Incidence, and Birth Outcomes: A Randomized Trial in Rural Nepal. *Clin. Infect. Dis.* **67**, 334-340 (2018). https://doi.org:10.1093/cid/ciy090

385 Kharbanda, E. O. *et al.* Inactivated influenza vaccine during pregnancy and risks for adverse obstetric events. *Obstet. Gynecol.* **122**, 659-667 (2013). https://doi.org:10.1097/AOG.0b013e3182a1118a

386 Kharbanda, E. O. *et al.* First Trimester Influenza Vaccination and Risks for Major Structural Birth Defects in Offspring. *J. Pediatr.* **187**, 234-239.e234 (2017). https://doi.org:10.1016/j.jpeds.2017.04.039

387 Kittikraisak, W. *et al.* Comparison of influenza antibody titers among women who were vaccinated in the 2<sup>nd</sup> and the 3<sup>rd</sup> trimesters of pregnancy. *Vaccine* **39**, 18-25 (2021). https://doi.org:10.1016/j.vaccine.2020.11.032

388 Kostinov, M. P. *et al.* Immunogenicity and safety of subunit influenza vaccines in pregnant women. *Erj Open Research* **4** (2018). https://doi.org:10.1183/23120541.00060-2017

389 Ladhani, S. N. *et al.* Antibody responses after primary immunization in infants born to women receiving a pertussis-containing vaccine during pregnancy: single arm observational study with a historical comparator. *Clin. Infect. Dis.* **61**, 1637-1644 (2015). https://doi.org:10.1093/cid/civ695

390 Launay, O. *et al.* Low rate of pandemic A/H1N1 2009 influenza infection and lack of severe complication of vaccination in pregnant women: a prospective cohort study. *PLoS ONE [Electronic Resource]* **7**, e52303 (2012). https://doi.org:10.1371/journal.pone.0052303

391 Legge, A., Dodds, L., MacDonald, N. E., Scott, J. & McNeil, S. Rates and determinants of seasonal influenza vaccination in pregnancy and association with neonatal outcomes. *CMAJ Canadian Medical Association Journal* **186**, E157-164 (2014). https://doi.org:10.1503/cmaj.130499

392 Lin, T. H. *et al.* AdimFlu-S( R) influenza A (H1N1) vaccine during pregnancy: the Taiwanese Pharmacovigilance Survey. *Vaccine* **30**, 2671-2675 (2012). https://doi.org:10.1016/j.vaccine.2012.02.008

393 Louik, C. *et al.* Risks and safety of pandemic H1N1 influenza vaccine in pregnancy: exposure prevalence, preterm delivery, and specific birth defects. *Vaccine* **31**, 5033-5040 (2013). https://doi.org:10.1016/j.vaccine.2013.08.096

394 Louik, C. *et al.* Safety of the 2011-12, 2012-13, and 2013-14 seasonal influenza vaccines in pregnancy: Preterm delivery and specific malformations, a study from the case-control arm of VAMPSS. *Vaccine* **34**, 4450-4459 (2016). https://doi.org:10.1016/j.vaccine.2016.06.078

395 Lu, Q. C., Zhang, T. Y., Bundhun, P. K. & Chen, C. One "misunderstood" health issue: demonstrating and communicating the safety of influenza a vaccination in pregnancy: a systematic review and meta-analysis. *BMC Public Health* **21**, 703 (2021). https://doi.org:10.1186/s12889-021-10740-w

396 Ludvigsson, J. F. *et al.* Maternal vaccination against H1N1 influenza and offspring mortality: population based cohort study and sibling design. *BMJ* **351**, h5585 (2015). https://doi.org:10.1136/bmj.h5585

397 Ludvigsson, J. F. *et al.* Risk for Congenital Malformation With H1N1 Influenza Vaccine: A Cohort Study With Sibling Analysis. *Ann. Intern. Med.* **165**, 848-855 (2016). https://doi.org:10.7326/M16-0139

398 Ludvigsson, J. F. *et al.* Maternal Influenza A(H1N1) Immunization During Pregnancy and Risk for Autism Spectrum Disorder in Offspring : A Cohort Study. *Ann. Intern. Med.* **173**, 597-604 (2020). https://doi.org:10.7326/M20-0167

399 Ludvigsson, J. F. *et al.* Influenza H1N1 vaccination and adverse pregnancy outcome. *Eur. J. Epidemiol.* **28**, 579-588 (2013). https://doi.org:10.1007/s10654-013-9813-z

400 Ma, F. *et al.* Prospective cohort study of the safety of an influenza A(H1N1) vaccine in pregnant Chinese women. *Clinical & Vaccine Immunology: CVI* **21**, 1282-1287 (2014). https://doi.org:10.1128/CVI.00375-14

401 Madhi, S. A. *et al.* Influenza vaccination of pregnant women and protection of their infants. *N. Engl. J. Med.* **371**, 918-931 (2014). https://doi.org:10.1056/NEJMoa1401480

402 Maltezou, H. C. *et al.* Effectiveness of quadrivalent influenza vaccine in pregnant women and infants, 2018–2019. *Vaccine* **38**, 4625-4631 (2020). https://doi.org:10.1016/j.vaccine.2020.04.060

403 Maltezou, H. C. *et al.* Effectiveness of maternal vaccination with quadrivalent inactivated influenza vaccine in pregnant women and their infants in 2019-2020. *Expert Review of Vaccines* **21**, 983-992 (2022). https://doi.org:10.1080/14760584.2022.2013820

404 Mazagatos, C., Godoy, P., Munoz Almagro, C., Pozo, F. & Larrauri, A. Effectiveness of influenza vaccination during pregnancy to prevent severe infection in children under 6 months of age, Spain, 2017-2019. *Vaccine* **38**, 8405-8410 (2020). https://doi.org:10.1016/j.vaccine.2020.07.014

405 McHugh, L. *et al.* Birth outcomes for Australian mother-infant pairs who received an influenza vaccine during pregnancy, 2012-2014: The FluMum study. *Vaccine* **35**, 1403-1409 (2017). https://doi.org:10.1016/j.vaccine.2017.01.075

406 McHugh, L. *et al.* Influenza vaccination in pregnancy among a group of remote dwelling Aboriginal and Torres Strait Islander mothers in the Northern Territory: The 1+1 Healthy Start to Life study. *Commun. Dis. Intell.* **43**, 15 (2019). https://doi.org:10.33321/cdi.2019.43.33

407 McHugh, L. *et al.* The Safety of Influenza and Pertussis Vaccination in Pregnancy in a Cohort of Australian Mother-Infant Pairs, 2012-2015: The FluMum Study. *Clin. Infect. Dis.* **68**, 402-408 (2019). https://doi.org:10.1093/cid/ciy517

408 McMillan, M., Kralik, D., Porritt, K. & Marshall, H. Influenza vaccination during pregnancy: A systematic review of effectiveness and safety. *JBI Database of Systematic Reviews and Implementation Reports* **12**, 281-381 (2014). https://doi.org:10.11124/jbisrir-2014-1269

409 McMillan, M., Porritt, K., Kralik, D., Costi, L. & Marshall, H. Influenza vaccination during pregnancy: a systematic review of fetal death, spontaneous abortion, and congenital malformation safety outcomes. *Vaccine* **33**, 2108-2117 (2015). https://doi.org:10.1016/j.vaccine.2015.02.068

410 McMorrow, M. L. *et al.* A Retrospective observational cohort study of the effect of antenatal influenza vaccination on birth outcomes in Cape Town, South Africa, 2015-2016. *Influenza Other Respi. Viruses* **15**, 446-456 (2021). https://doi.org:10.1111/irv.12836

411 McRae, J. *et al.* Preventing severe influenza in Australian infants: Maternal influenza vaccine effectiveness in the PAEDS-FluCAN networks using the test-negative design. *Vaccine* **40**, 2761-2771 (2022). https://doi.org:10.1016/j.vaccine.2022.03.042

412 Mehrabadi, A. *et al.* Association of Maternal Influenza Vaccination During Pregnancy With Early Childhood Health Outcomes. *JAMA* **325**, 2285-2293 (2021). https://doi.org:10.1001/jama.2021.6778

413 Mohammed, H. *et al.* Safety and protective effects of maternal influenza vaccination on pregnancy and birth outcomes: A prospective cohort study. *EClinicalMedicine* **26**, 100522 (2020). https://doi.org:10.1016/j.eclinm.2020.100522

414 Molgaard-Nielsen, D., Fischer, T. K., Krause, T. G. & Hviid, A. Effectiveness of maternal immunization with trivalent inactivated influenza vaccine in pregnant women and their infants. *J. Intern. Med.* **286**, 469-480 (2019). https://doi.org:10.1111/joim.12947

415 Munoz, F. M. *et al.* Safety of influenza vaccination during pregnancy. *Am. J. Obstet. Gynecol.* **192**, 1098-1106 (2005). https://doi.org:10.1016/j.ajog.2004.12.019

416 Munoz, F. M. *et al.* Safety and immunogenicity of seasonal trivalent inactivated influenza vaccines in pregnant women. *Vaccine* **36**, 8054-8061 (2018). https://doi.org:10.1016/j.vaccine.2018.10.088

417 Munoz, F. M. *et al.* Safety and immunogenicity of three seasonal inactivated influenza vaccines among pregnant women and antibody persistence in their infants. *Vaccine* **38**, 5355-5363 (2020). https://doi.org:10.1016/j.vaccine.2020.05.059

418 Mutsaerts, E. *et al.* Influenza vaccination of pregnant women protects them over two consecutive influenza seasons in a randomized controlled trial. *Expert Review of Vaccines* **15**, 1055-1062 (2016). https://doi.org:10.1080/14760584.2016.1192473

419 Nakabembe, E. *et al.* The safety and immunogenicity of vaccines administered to pregnant women living with HIV: a systematic review and meta-analysis. *EClinicalMedicine* **69**, 102448 (2024). https://doi.org:10.1016/j.eclinm.2024.102448

420 Nakphook, S. *et al.* Antibody responses induced by trivalent inactivated influenza vaccine among pregnant and non-pregnant women in Thailand: A matched cohort study. *PLoS ONE [Electronic Resource]* **16**, e0253028 (2021). https://doi.org:10.1371/journal.pone.0253028

421 Nasser, R. *et al.* Are all vaccines safe for the pregnant traveller? A systematic review and meta-analysis. *J. Travel Med.* **27**, 13 (2020). https://doi.org:10.1093/jtm/taz074

422 Nordin, J. D. *et al.* Maternal safety of trivalent inactivated influenza vaccine in pregnant women. *Obstet. Gynecol.* **121**, 519-525 (2013). https://doi.org:10.1097/AOG.0b013e3182831b83

423 Nordin, J. D. *et al.* Maternal influenza vaccine and risks for preterm or small for gestational age birth. *J. Pediatr.* **164**, 1051-1057.e1052 (2014). https://doi.org:10.1016/j.jpeds.2014.01.037

424 Nordin, J. D. *et al.* Monovalent H1N1 influenza vaccine safety in pregnant women, risks for acute adverse events. *Vaccine* **32**, 4985-4992 (2014). https://doi.org:10.1016/j.vaccine.2014.07.017

425 Nunes, M. C., Aqil, A. R., Omer, S. B. & Madhi, S. A. The Effects of Influenza Vaccination during Pregnancy on Birth Outcomes: A Systematic Review and Meta-Analysis. *Am. J. Perinatol.* **33**, 1104-1114 (2016). https://doi.org:10.1055/s-0036-1586101

426 Nunes, M. C. *et al.* Efficacy of Maternal Influenza Vaccination Against All-Cause Lower Respiratory Tract Infection Hospitalizations in Young Infants: Results From a Randomized Controlled Trial. *Clin. Infect. Dis.* **65**, 1066-1071 (2017). https://doi.org:10.1093/cid/cix497

427 Nunes, M. C. & Madhi, S. A. Influenza vaccination during pregnancy for prevention of influenza confirmed illness in the infants: A systematic review and meta-analysis. *Hum. Vaccin. Immunother.* **14**, 758-766 (2018). https://doi.org:10.1080/21645515.2017.1345385

428 Nunes, M. C. *et al.* Effectiveness of Influenza Vaccination of Pregnant Women for Prevention of Maternal and Early Infant Influenza-Associated Hospitalizations in South Africa: A Prospective Test-Negative Study. *Open Forum Infectious Diseases* **9**, ofac552 (2022). https://doi.org:10.1093/ofid/ofac552

429 Ohfuji, S. *et al.* Protective Effect of Maternal Influenza Vaccination on Influenza in Their Infants: A Prospective Cohort Study. *J. Infect. Dis.* **217**, 878-886 (2018). https://doi.org:10.1093/infdis/jix629

430 Ohfuji, S. *et al.* Safety of influenza vaccination on adverse birth outcomes among pregnant women: A prospective cohort study in Japan. *Int. J. Infect. Dis.* **93**, 68-76 (2020). https://doi.org:10.1016/j.ijid.2020.01.033

431 Olsen, S. J. *et al.* The Effect of Influenza Vaccination on Birth Outcomes in a Cohort of Pregnant Women in Lao PDR, 2014-2015. *Clin. Infect. Dis.* **63**, 487-494 (2016). https://doi.org:10.1093/cid/ciw290

432 Omer, S. B. *et al.* Maternal influenza immunization and reduced likelihood of prematurity and small for gestational age births: a retrospective cohort study. *PLoS Medicine / Public Library of Science* **8**, e1000441 (2011). https://doi.org:10.1371/journal.pmed.1000441

433 Oppermann, M. *et al.* A(H1N1)v2009: a controlled observational prospective cohort study on vaccine safety in pregnancy. *Vaccine* **30**, 4445-4452 (2012). https://doi.org:10.1016/j.vaccine.2012.04.081

434 Owusu, D. *et al.* Effectiveness of Maternal Influenza Vaccination in Peru PRIME Cohort. *Open Forum Infectious Diseases* **10**, ofad033 (2023). https://doi.org:10.1093/ofid/ofad033

435 Paganoti, C. F., Rodrigues, A. S., Francisco, R. P. V. & Costa, R. A. D. The Influenza Vaccine May Protect Pregnant and Postpartum Women against Severe COVID-19. **10**, 28 (2022). https://doi.org:10.3390/vaccines10020206

436 Palmsten, K. *et al.* Influenza vaccination during pregnancy and risk of selected major structural noncardiac birth defects, National Birth Defects Prevention Study 2006-2011. *Pharmacoepidemiol. Drug Saf.* **31**, 851-862 (2022). https://doi.org:10.1002/pds.5435

437 Palmsten, K. *et al.* Influenza vaccination during pregnancy and risk of selected major structural congenital heart defects, National Birth Defects Prevention Study 2006-2011. *Birth Defects Research* **115**, 88-95 (2023). https://doi.org:10.1002/bdr2.2114

438 Panagiotakopoulos, L. *et al.* Evaluating the Association of Stillbirths After Maternal Vaccination in the Vaccine Safety Datalink. *Obstet. Gynecol.* **136**, 1086-1094 (2020). https://doi.org:10.1097/AOG.0000000000004166

439 Pasternak, B. *et al.* Risk of adverse fetal outcomes following administration of a pandemic influenza A(H1N1) vaccine during pregnancy. *JAMA* **308**, 165-174 (2012). https://doi.org:10.1001/jama.2012.6131

440 Pasternak, B. *et al.* Vaccination against pandemic A/H1N1 2009 influenza in pregnancy and risk of fetal death: cohort study in Denmark. *BMJ* **344**, e2794 (2012). https://doi.org:10.1136/bmj.e2794

441 Peppa, M. *et al.* Seasonal Influenza Vaccination During Pregnancy and the Risk of Major Congenital Malformations in Live-born Infants: A 2010-2016 Historical Cohort Study. *Clin. Infect. Dis.* **73**, e4296-e4304 (2021). https://doi.org:10.1093/cid/ciaa845

442 Poehling, K. A. *et al.* Impact of maternal immunization on influenza hospitalizations in infants. *Am. J. Obstet. Gynecol.* **204**, S141-148 (2011). https://doi.org:10.1016/j.ajog.2011.02.042

443 Polyzos, K. A., Konstantelias, A. A., Pitsa, C. E. & Falagas, M. E. Maternal Influenza Vaccination and Risk for Congenital Malformations: A Systematic Review and Meta-analysis. *Obstet. Gynecol.* **126**, 1075-1084 (2015). https://doi.org:10.1097/AOG.0000000000001068

444 Puleston, R. *et al.* Multi-centre observational study of transplacental transmission of influenza antibodies following vaccination with AS03(A)-adjuvanted H1N1 2009 vaccine. *PLoS ONE [Electronic Resource]* **8**, e47448 (2013). https://doi.org:10.1371/journal.pone.0047448

445 Quach, T. H. T., Mallis, N. A. & Cordero, J. F. Influenza Vaccine Efficacy and Effectiveness in Pregnant Women: Systematic Review and Meta-analysis. *Maternal & Child Health Journal* **24**, 229-240 (2020). https://doi.org:10.1007/s10995-019-02844-y

446 Regan, A. K. *et al.* Effect of Maternal Influenza Vaccination on Hospitalization for Respiratory Infections in Newborns: A Retrospective Cohort Study. *Pediatr. Infect. Dis. J.* **35**, 1097-1103 (2016). https://doi.org:10.1097/INF.0000000000001258

447 Regan, A. K. *et al.* Effectiveness of seasonal trivalent influenza vaccination against hospital-attended acute respiratory infections in pregnant women: A retrospective cohort study. *Vaccine* **34**, 3649-3656 (2016). https://doi.org:10.1016/j.vaccine.2016.05.032

448 Regan, A. K. *et al.* Seasonal Trivalent Influenza Vaccination During Pregnancy and the Incidence of Stillbirth: Population-Based Retrospective Cohort Study. *Clin. Infect. Dis.* **62**, 1221-1227 (2016). https://doi.org:10.1093/cid/ciw082

449 Regan, A. K., Tracey, L. E., Blyth, C. C., Richmond, P. C. & Effler, P. V. A prospective cohort study assessing the reactogenicity of pertussis and influenza vaccines administered during pregnancy. *Vaccine* **34**, 2299-2304 (2016). https://doi.org:10.1016/j.vaccine.2016.03.084

450 Restivo, V. *et al.* Influenza vaccine effectiveness among high-risk groups: A systematic literature review and meta-analysis of case-control and cohort studies. *Hum. Vaccin. Immunother.* **14**, 724-735 (2018). https://doi.org:10.1080/21645515.2017.1321722

451 Richards, J. L. *et al.* Neonatal outcomes after antenatal influenza immunization during the 2009 H1N1 influenza pandemic: impact on preterm birth, birth weight, and small for gestational age birth. *Clin. Infect. Dis.* **56**, 1216-1222 (2013). https://doi.org:10.1093/cid/cit045

452 Robinson, C. *et al.* Outcomes in Pregnant Persons Immunized with a Cell-Based Quadrivalent Inactivated Influenza Vaccine: A Prospective Observational Cohort Study. **10**, 23 (2022). https://doi.org:10.3390/vaccines10101600

453 Romano, C. J. *et al.* History of pandemic H1N1-containing influenza vaccination and risk for spontaneous abortion and birth defects. *Vaccine* **39**, 6553-6562 (2021). https://doi.org:10.1016/j.vaccine.2021.09.003

454 Rowe, S. L. *et al.* Maternal Vaccination and Infant Influenza and Pertussis. *Pediatrics* **148**, 09 (2021). https://doi.org:10.1542/peds.2021-051076

455 Rubinstein, F. *et al.* Influenza A/H1N1 MF59 adjuvanted vaccine in pregnant women and adverse perinatal outcomes: multicentre study. *BMJ* **346**, f393 (2013). https://doi.org:10.1136/bmj.f393

456 Sahni, L. C. *et al.* Maternal Vaccine Effectiveness Against Influenza-Associated Hospitalizations and Emergency Department Visits in Infants. *JAMA Pediatrics* **178**, 176-184 (2024). https://doi.org:10.1001/jamapediatrics.2023.5639

457 Salam, R. A., Das, J. K., Dojo Soeandy, C., Lassi, Z. S. & Bhutta, Z. A. Impact of Haemophilus influenzae type B (Hib) and viral influenza vaccinations in pregnancy for improving maternal, neonatal and infant health outcomes. *Cochrane Database Syst. Rev.*, CD009982 (2015). https://doi.org:10.1002/14651858.CD009982.pub2

458 Sammon, C. J., Snowball, J., McGrogan, A. & de Vries, C. S. Evaluating the hazard of foetal death following H1N1 influenza vaccination; a population based cohort study in the UK GPRD. *PLoS ONE [Electronic Resource]* **7**, e51734 (2012). https://doi.org:10.1371/journal.pone.0051734

459 Sarna, M., Pereira, G. F., Foo, D., Baynam, G. S. & Regan, A. K. The risk of major structural birth defects associated with seasonal influenza vaccination during pregnancy: A population-based cohort study. *Birth Defects Research* **114**, 1244-1256 (2022). https://doi.org:10.1002/bdr2.2049

460 Shaikh, H. *et al.* Safety and Protective Effects of Influenza Vaccination in Pregnant Women on Pregnancy and Birth Outcomes in Pune, India: A Cross-Sectional Study. **11**, 28 (2023). https://doi.org:10.3390/vaccines11061034

461 Shakib, J. H. *et al.* Influenza in Infants Born to Women Vaccinated During Pregnancy. *Pediatrics* **137**, 06 (2016). https://doi.org:10.1542/peds.2015-2360

462 Sheffield, J. S. *et al.* Effect of influenza vaccination in the first trimester of pregnancy. *Obstet. Gynecol.* **120**, 532-537 (2012). https://doi.org:10.1097/AOG.0b013e318263a278

463 Simoes, E. A. F. *et al.* Trivalent influenza vaccination randomized control trial of pregnant women and adverse fetal outcomes. *Vaccine* **37**, 5397-5403 (2019). https://doi.org:10.1016/j.vaccine.2019.07.024

464 Singh, M. *et al.* Influenza vaccine: A viable option to protect pregnant women and infants from seasonal flu: A retrospective hospital-based study in India. *Int. J. Clin. Pract.* **73**, e13361 (2019). https://doi.org:10.1111/ijcp.13361

465 Speake, H. A., Pereira, G. & Regan, A. K. Risk of adverse maternal and foetal outcomes associated with inactivated influenza vaccination in first trimester of pregnancy. *Paediatr. Perinat. Epidemiol.* **35**, 196-205 (2021). https://doi.org:10.1111/ppe.12715

466 Steinhoff, M. C. *et al.* Year-round influenza immunisation during pregnancy in Nepal: a phase 4, randomised, placebo-controlled trial. *The Lancet Infectious Diseases* **17**, 981-989 (2017). https://doi.org:10.1016/S1473-3099(17)30252-9

467 Steinhoff, M. C. *et al.* Neonatal outcomes after influenza immunization during pregnancy: a randomized controlled trial. *CMAJ Canadian Medical Association Journal* **184**, 645-653 (2012). https://doi.org:10.1503/cmaj.110754

468 Sugimura, T. *et al.* Effectiveness of maternal influenza immunization in young infants in Japan. *Pediatr. Int.* **58**, 709-713 (2016). https://doi.org:10.1111/ped.12888

469 Sukumaran, L. *et al.* Infant Hospitalizations and Mortality After Maternal Vaccination. *Pediatrics* **141**, 03 (2018). https://doi.org:10.1542/peds.2017-3310

470 Thompson, M. G. *et al.* Influenza Vaccine Effectiveness in Preventing Influenza-associated Hospitalizations During Pregnancy: A Multi-country Retrospective Test Negative Design Study, 2010-2016. *Clin. Infect. Dis.* **68**, 1444-1453 (2019). https://doi.org:10.1093/cid/ciy737

471 Thompson, M. G. *et al.* Effectiveness of seasonal trivalent influenza vaccine for preventing influenza virus illness among pregnant women: a population-based case-control study during the 2010-2011 and 2011-2012 influenza seasons. *Clin. Infect. Dis.* **58**, 449-457 (2014). https://doi.org:10.1093/cid/cit750

472 Trotta, F. *et al.* Evaluation of safety of A/H1N1 pandemic vaccination during pregnancy: cohort study. *BMJ* **348**, g3361 (2014). https://doi.org:10.1136/bmj.g3361

473 Tsai, T. *et al.* Exposure to MF59-adjuvanted influenza vaccines during pregnancy--a retrospective analysis. *Vaccine* **28**, 1877-1880 (2010). https://doi.org:10.1016/j.vaccine.2009.11.077

474 Tunheim, G. *et al.* Antibody levels in a cohort of pregnant women after the 2009 influenza A(H1N1) pandemic: Waning and association with self-reported severity and duration of illness. *Influenza Other Respi. Viruses* **13**, 191-200 (2019). https://doi.org:10.1111/irv.12623

475 van der Maas, N. *et al.* Safety of vaccination against influenza A (H1N1) during pregnancy in the Netherlands: results on pregnancy outcomes and infant's health: cross-sectional linkage study. *BJOG* **123**, 709-717 (2016). https://doi.org:10.1111/1471-0528.13329

476 Vazquez-Benitez, G. *et al.* Risk of Preterm or Small-for-Gestational-Age Birth After Influenza Vaccination During Pregnancy: Caveats When Conducting Retrospective Observational Studies. *Am. J. Epidemiol.* **184**, 176-186 (2016). https://doi.org:10.1093/aje/kww043

477 Vesikari, T. *et al.* Immunogenicity and safety of a quadrivalent inactivated influenza vaccine in pregnant women: a randomized, observer-blind trial. *Hum. Vaccin. Immunother.* **16**, 623-629 (2020). https://doi.org:10.1080/21645515.2019.1667202

478 Vousden, N., Bunch, K. & Knight, M. Incidence, risk factors and impact of seasonal influenza in pregnancy: A national cohort study. *PLoS ONE [Electronic Resource]* **16**, e0244986 (2021). https://doi.org:10.1371/journal.pone.0244986

479 Walsh, L. K. *et al.* Health outcomes of young children born to mothers who received 2009 pandemic H1N1 influenza vaccination during pregnancy: retrospective cohort study. *BMJ* **366**, l4151 (2019). https://doi.org:10.1136/bmj.l4151

480 Wortman, A. C., Casey, B. M., McIntire, D. D. & Sheffield, J. S. Association of influenza vaccination on decreased stillbirth rate. *Am. J. Perinatol.* **32**, 571-576 (2015). https://doi.org:10.1055/s-0034-1544046

481 Xie, S., Monteiro, K. & Gjelsvik, A. The association between maternal influenza vaccination during pregnancy and adverse birth outcomes in the United States: Pregnancy risk Assessment Monitoring System (PRAMS). *Vaccine* **41**, 2300-2306 (2023). https://doi.org:10.1016/j.vaccine.2023.02.074

482 Yamada, T. *et al.* Vaccination during the 2013-2014 influenza season in pregnant Japanese women. *Eur. J. Clin. Microbiol. Infect. Dis.* **34**, 543-548 (2015). https://doi.org:10.1007/s10096-014-2259-8

483 Yamada, T. *et al.* Pandemic (H1N1) 2009 in pregnant Japanese women in Hokkaido. *J. Obstet. Gynaecol. Res.* **38**, 130-136 (2012). https://doi.org:10.1111/j.1447-0756.2011.01644.x

484 Zaman, K. *et al.* Effectiveness of maternal influenza immunization in mothers and infants. *N. Engl. J. Med.* **359**, 1555-1564 (2008). https://doi.org:10.1056/NEJMoa0708630

485 Zerbo, O. *et al.* No association between influenza vaccination during pregnancy and adverse birth outcomes. *Vaccine* **35**, 3186-3190 (2017). https://doi.org:10.1016/j.vaccine.2017.04.074

486 Zerbo, O. *et al.* Association Between Influenza Infection and Vaccination During Pregnancy and Risk of Autism Spectrum Disorder. *JAMA Pediatrics* **171**, e163609 (2017). https://doi.org:10.1001/jamapediatrics.2016.3609

487 Zhang, C., Wang, X., Liu, D., Zhang, L. & Sun, X. A systematic review and meta-analysis of fetal outcomes following the administration of influenza A/H1N1 vaccination during pregnancy. *Int. J. Gynaecol. Obstet.* **141**, 141-150 (2018). https://doi.org:10.1002/ijgo.12394

488 Zhong, Z. *et al.* The impact of timing of maternal influenza immunization on infant antibody levels at birth. *Clin. Exp. Immunol.* **195**, 139-152 (2019). https://doi.org:10.1111/cei.13234

489 Zhao, S. *et al.* Effect of maternal vaccination on infant morbidity in Bangladesh. *BMC Public Health* **24**, 1213 (2024). https://doi.org:10.1186/s12889-024-18486-x

490 Ma'ayeh, M. *et al.* Association Between Influenza Vaccination and SARS-CoV-2 Infection. *American journal of reproductive immunology (New York, N.Y. : 1989)* **92**, e13896 (2024). https://doi.org:10.1111/aji.13896

491 Hsiao, A. *et al.* Safety of quadrivalent recombinant influenza vaccine in pregnant persons and their infants. *AJOG Global Reports* **4** (2024). https://doi.org:10.1016/j.xagr.2024.100395

492 Getahun, D. *et al.* Safety of the Seasonal Influenza Vaccine in 2 Successive Pregnancies. *JAMA Network Open* **7**, e2434857 (2024). https://doi.org:10.1001/jamanetworkopen.2024.34857

493 Regan, A. K., Sullivan, S. G. & Arah, O. A. Maternal influenza vaccination and associated risk of fetal loss: A claims-based prospective cohort study. *Vaccine* **42** (2024). https://doi.org:10.1016/j.vaccine.2024.126256

494 Liang, X. F. *et al.* A retrospective cohort study on the protective effect of influenza vaccination during pregnancy in Gansu Province. *Human Vaccines and Immunotherapeutics* **20** (2024). https://doi.org:10.1080/21645515.2024.2418674

495 Lee, H. *et al.* Association of Influenza Vaccination During Pregnancy with Health Outcomes in Mothers and Children: A Population-Based Cohort Study. *Clin. Pharmacol. Ther.* **117**, 1381-1392 (2025). https://doi.org:https://dx.doi.org/10.1002/cpt.3565

496 Malange, V. *et al.* Influenza vaccination during early pregnancy and risk of major birth defects, US Birth Defects Study To Evaluate Pregnancy exposureS, 2014-2019. *Vaccine* **59**, 127297 (2025). https://doi.org:https://dx.doi.org/10.1016/j.vaccine.2025.127297

497 Reeves, E. L. *et al.* Effectiveness of 2023-2024 seasonal influenza vaccine against influenza-associated emergency department and urgent care encounters among pregnant and non-pregnant women of reproductive age. *Vaccine* **62**, 127483 (2025). https://doi.org:https://dx.doi.org/10.1016/j.vaccine.2025.127483

498 Zasztowt-Sternicka, M. *et al.* Immunogenicity of inactivated quadrivalent influenza vaccine in pregnant women, including the level of postvaccination antibodies in umbilical cord blood. *Vaccine* **53**, 127047 (2025). https://doi.org:https://dx.doi.org/10.1016/j.vaccine.2025.127047

499 Zerbo, O., Modaressi, S., Goddard, K., Fireman, B. & Klein, N. P. Influenza Vaccination During Pregnancy and Infant Influenza in the First 6 Months of Life. *Obstet. Gynecol.* **146**, e36-e42 (2025). https://doi.org:https://dx.doi.org/10.1097/AOG.0000000000005986

500 Neeman, S., Hemo, M., Meiri, G., Shmueli, D. & Menashe, I. Maternal influenza vaccination during pregnancy and risk of ASD in the offspring. *medRxiv* (2025). https://doi.org:10.1101/2025.06.21.25330046

501 Hall, C. *et al.* Receipt of Tdap or Influenza Vaccine During Pregnancy and Odds of Clinical Chorioamnionitis: A Nested Case-Control Study. *Pharmacoepidemiol. Drug Saf.* **34**, e70147 (2025). https://doi.org:https://dx.doi.org/10.1002/pds.70147

## Supplementary information 8: Characteristics of maternal influenza studies and evidence syntheses

| Author | Study Design | Publication type | Efficacy maternal health outcome | Efficacy infant health outcome | Harms maternal health | Harms infant health | Immunogenicity Mother | Immunogenicity Child | Timing during pregnancy | Comparison |
| --- | --- | --- | --- | --- | --- | --- | --- | --- | --- | --- |
| Adedinsewo et al. 320 | controlled cohort study |  |  |  |  | x |  |  |  | vaccinated vs unvaccinated |
| Ahrens et al. 321 | case control study |  |  |  |  | x |  |  | x | vaccinated vs unvaccinated |
| Arriola et al. 322 | controlled cohort study |  |  |  |  | x |  |  | x | vaccinated vs unvaccinated |
| Avalos et al. 323 | controlled cohort study |  |  |  |  | x |  |  | x | vaccinated vs unvaccinated |
| Bansal et al. 309 | SR |  | x | x | x | x | x | x | x | vaccinated vs placebo/other vaccine |
| Baum et al. 324 | controlled cohort study |  |  |  | x | x |  |  | x | vaccinated vs unvaccinated |
| Beau et al. 325 | controlled cohort study |  |  |  | x | x |  |  |  | vaccinated vs unvaccinated |
| Becerra-Culqui et al. 326 | controlled cohort study |  |  | x | x | x |  |  | x | vaccinated vs unvaccinated |
| Benowitz et al. 327 | case control study |  |  | x |  |  |  |  |  | vaccinetd vs unvaccinated |
| Bischoff et al. 328 | controlled cohort study |  |  | x |  |  |  | x |  | vaccinated vs unvaccinated |
| Black et al. 329 | controlled cohort study |  | x | x | x |  |  |  |  | vaccinated vs unvaccinated |
| Blanchard-Rohner et al. 330 | controlled cohort study |  |  |  |  |  | x | x | x | vaccinated ( H1N1 vaccine vs H3N2 vs Influenza B) vs unvaccinated |
| Bratton et al. 331 | SR |  |  |  | x | x |  |  |  | vaccinated vs unvaccinated |
| Cantu et al. 332 | controlled cohort study |  |  |  | x | x |  |  |  | vaccinated vs unvaccinated |
| Chambers et al. 333 | controlled cohort study |  |  |  | x | x |  |  | x | vaccinated vs unvaccinated ; |
| Chambers et al. 334 | controlled cohort study |  |  |  | x | x |  |  | x | vaccinated vs unvaccinated ; |
| Chao et al. 336 | controlled cohort study |  |  | x | x | x | x | x |  | vaccinated (before conception-trivalent) vs vaccinated (during pregnancy-monovalent) vs unvaccinated |
| Chao et al. 335 | controlled cohort study |  | x | x |  | x | x | x |  | vaccinated vs unvaccinated |
| Chavant et al. 337 | controlled cohort study |  |  |  | x | x |  |  | x | vaccinated (trimester comparisons) |
| Chittajallu et al. 235 | SR |  |  |  | x | x | x | x |  | vaccinated vs unvaccinated or placebo |
| Choi et al. 250 | controlled cohort study |  |  |  | x | x |  |  |  | covid vaccinated vs influenza vaccinated |
| Cleary et al. 338 | controlled cohort study |  |  |  |  | x |  |  |  | vaccinated vs unvaccinated |
| Clements et al. 339 | controlled cohort study |  |  |  |  |  | x | x |  | vaccinated vs unvaccinated |
| Coenders et al. 340 | case control study |  |  |  | x | x |  |  | x | vaccinated (once vs twice) vs unvaccinated; T1 vs T2 vs T3 for first and second vaccination |
| Conlin et al. 341 | controlled cohort study |  |  |  |  | x |  |  |  | vaccinated (pandemic H1N1 vs seasonal influenza) |
| Conlin et al. 342 | controlled cohort study |  |  |  | x | x |  |  |  | pandemic H1N1 vaccine group vs 2008–2009 seasonal influenza vaccine group |
| Cowling et al. 343 | controlled cohort study |  |  | x |  |  |  | x |  | vaccinated vs unvaccinated mothers |
| Cuningham et al. 344 | SR |  |  |  |  |  | x | x | x | vaccinated (trimester comparison) |
| Dabrera et al. 345 | case control study |  |  | x |  |  |  |  |  | vaccinated vs unvaccinated |
| de Bruin et al. 346 | SR |  | x (only for influenza) | x |  | x |  |  |  | vaccine vs placebo/no vaccine |
| Deese et al. 220 | SR |  |  | x |  |  | x |  |  | vaccinated vs unvaccinated |
| Demicheli et al. 347 | SR |  | x |  | x |  |  |  |  | inactivated vaccine vs placebo; inactivated aerosol vaccine vs placebo; live aerosol vaccine vs placebo |
| Dodds et al. 348 | controlled cohort study |  |  |  |  | x |  |  |  | vaccinated vs unvaccinated |
| Donahue et al. 349 | case control study |  |  |  | x |  |  |  |  | vaccinated vs unvaccinated in the previous season |
| Donahue et al. 350 | case control study |  |  |  | x |  |  |  |  | vaccinated vs unvaccinated |
| Duque et al. 351 | controlled cohort study |  | x |  | x | x |  |  |  | vaccinated vs unvaccinated |
| Eick et al. 352 | controlled cohort study |  |  | x |  |  |  | x | x | vaccinated vs unvaccinated |
| Fabiani et al. 353 | controlled cohort study |  | x |  | x | x |  |  |  | vaccinated vs unvaccinated |
| Fell et al. 354 | SR |  |  |  |  | x |  |  |  | vaccinated vs unvaccinated |
| Fell et al. 357 | controlled cohort study |  |  | x |  |  |  |  |  | vaccinated vs unvaccinated |
| Fell et al. 355 | test-negative design study |  |  | x | x |  |  |  | x | vaccinated vs. unvaccinated |
| Fell et al. 356 | controlled cohort study |  |  |  | x | x |  |  |  | vaccinated vs unvaccinated |
| Fisher et al. 358 | controlled cohort study |  |  |  |  |  | x | x |  | infected (during pregnancy) vs vaccinated vs control (not infected or vaccinated) |
| Foo et al. 359 | controlled cohort study |  |  | x |  | x |  |  | x | vaccinated (T1, T2, T3) vs unvaccinated |
| Foo et al. 362 | controlled cohort study |  |  |  |  | x |  |  | x | vaccinated vs unvaccinated |
| Foo et al. 360 | controlled cohort study |  |  |  |  | x |  |  | x | vaccinated (T1, T2, T3) vs unvaccinated |
| Foo et al. 363 | SR |  |  | x |  | x |  |  | x | vaccinated vs unvaccinated |
| Foo et al. 361 | controlled cohort study |  |  |  |  | x |  |  | x | vaccinated (T1, T2, T3) vs unvaccinated |
| France et al. 364 | controlled cohort study |  |  | x |  |  |  |  |  | vaccinated vs unvaccinated |
| Galvao et al. 365 | SR |  | x | x |  | x |  |  |  | vaccinated vs unvaccinated/placebo |
| Getahun et al. 366 | controlled cohort study |  | x |  | x | x |  |  | x | vaccinated vs unvaccinated; pre-pregnancy vs T1 vs T2 vs T3 |
| Getahun et al. 492 | controlled cohort study |  |  |  | x | x |  |  |  | vaccinated vs unvaccinated |
| Gidengil et al. 312,319 | SR |  |  |  | x | x |  |  | x | Influenza vaccines vs active comparator (either trivalent influenza vaccine or another influenza vaccine) |
| Giles et al. 367 | controlled cohort study |  |  |  | x | x |  |  |  | vaccinated vs unvaccinated |
| Giles et al. 368 | SR |  |  |  |  | x |  |  | x | vaccinated vs unvaccinated |
| Glover et al. 369 | controlled cohort study |  |  |  | x |  |  |  | x | IIV alone vs dTpa alone vs IIV&dTpa |
| Goldman et al. 370 | controlled cohort study |  |  |  |  | x |  |  |  | five types of vaccines durong consecutive influenza seasons, 2006/2006 through 2010/2011 |
| Gunatilaka et al. 371 | controlled cohort study |  |  |  |  | x |  |  |  | vaccinated (influenza, pertusis, both) vs unvaccinated |
| Gunnes et al. 372 | controlled cohort study |  |  |  |  | x |  |  | x | vaccinated vs unvaccinated |
| Haberg et al. 373 | controlled cohort study |  | x |  |  | x |  |  |  | vaccinated vs unvaccinated |
| Hall et al. 501 | case control study |  |  |  | x |  |  |  | x | vaccinated vs unvaccinated |
| Hansen et al. 374 | SR |  |  |  | x | x |  |  |  | vaccine vs placebo/no vaccine. |
| Heikkinen et al. 375 | controlled cohort study |  |  |  | x | x |  |  | x | vaccinated (MF59-adjuvanted A/H1N1 vaccine) vs unvaccinated; |
| Hsiao et al. 491 | controlled cohort study |  |  |  | x | x |  |  |  | vaccine type |
| Huang et al. 377 | case control study |  |  |  |  | x |  |  | x | vaccinated vs. unvaccinated |
| Huang et al. 376 | controlled cohort study |  |  |  | x | x |  |  | x | vaccinated (unadjuvanted vaccine vs MF59H-adjuvanted vaccine) compared for each trimester |
| Hviid et al. 378 | controlled cohort study |  |  | x |  | x |  |  | x | vaccinated (T1, T2-3) vs unvaccinated |
| Irving et al. 379 | case control study |  |  |  | x |  |  |  | x | vaccinated vs unvaccinated |
| Jarvis et al. 380 | SR |  |  | x |  |  |  |  | x | vaccine vs control (placebo, no vaccination) |
| Jeong et al. 381 | SR |  |  |  |  | x |  |  |  | vaccinated vs unvaccinated |
| Kallen et al. 382 | controlled cohort study |  |  |  | x | x |  |  | x | vaccinated vs unvaccinated |
| Katz et al. 383 | RCT |  |  |  |  | x |  |  |  | vaccinated vs unvaccinated |
| Katz et al. 384 | RCT |  | x | x |  | x | x | x | x | vaccinated vs placebo |
| Kharbanda et al. 385 | controlled cohort study |  |  |  | x |  |  |  | x | vaccinated vs unvaccinated |
| Kharbanda et al. 386 | controlled cohort study |  |  |  |  | x |  |  |  | vaccinated vs unvaccinated |
| Kittikraisak et al. 387 | controlled cohort study |  |  |  |  |  |  | x | x | vaccinated (T2 vs T3) vs unvaccinated |
| Kostinov et al. 388 | RCT |  |  |  | x | x | x |  |  | Agrippal S1 non-adjuvanted vaccine vs trivalent inactivated polymeric-subunit preparation Grippol Plus vs placebo |
| Ladhani et al. 389 | controlled cohort study |  |  |  |  |  |  | x | x | vaccinated vs unvaccinated |
| Launay et al. 390 | controlled cohort study |  | x |  | x | x | x |  |  | vaccinated vs unvaccinated |
| Lee et al. 495 | controlled cohort study |  |  |  | x | x |  |  | x | vaccinated vs unvaccinated; type of vaccine |
| Legge et al. 391 | controlled cohort study |  |  |  |  | x |  |  |  | vaccinated vs unvaccinated |
| Liang et al. 494 | controlled cohort study |  | x |  |  |  |  |  | x | vaccinated vs unvaccinated |
| Lin et al. 392 | controlled cohort study |  |  |  | x | x |  |  | x | vaccinated vs unvaccinated |
| Louik et al. 393 | case control study |  |  |  | x | x |  |  | x | vaccinated vs unvaccinated; |
| Louik et al. 394 | case control study |  |  |  | x | x |  |  | x | vaccinated vs unvaccinated |
| Lu et al. 395 | SR |  |  |  |  | x |  |  |  | vaccinated vs unvaccinated |
| Ludvigsson et al. 396 | controlled cohort study |  |  |  |  | x |  |  | x | vaccinated vs unvaccinated |
| Ludvigsson et al. 398 | controlled cohort study |  |  |  |  | x |  |  | x | vaccinated vs unvaccinated |
| Ludvigsson et al. 397 | controlled cohort study |  |  |  |  | x |  |  | x | vaccinated vs unvaccinated; timing comparison |
| Ludvigsson et al. 399 | controlled cohort study |  |  |  |  | x |  |  | x | vaccinated (mono-valent AS03 adju-vanted H1N1 vaccine) vs unvaccinated |
| Ma et al. 400 | controlled cohort study |  | x |  | x | x | x |  |  | vaccinated vs unvaccinated |
| Ma’ayeh et al. 490 | controlled cohort study |  | x |  | x | x |  |  |  | vaccinated vs unvaccinated |
| Madhi et al. 401 | RCT |  | x | x |  | x | x | x |  | vaccine vs placebo in HIV positive pregnant women and in HIV negative pregnant women |
| Malange et al. 496 | case-control study |  |  |  |  | x |  |  |  | vaccinated vs unvaccinated |
| Maltezou et al. 402 | controlled cohort study |  | x | x |  |  |  |  |  | vaccinated vs unvaccinated |
| Maltezou et al. 403 | controlled cohort study |  | x | x | x | x |  |  |  | vaccinated vs unvaccinated |
| Mazagatos et al. 404 | controlled cohort study |  |  | x |  |  |  |  |  | vaccinated vs unvaccinated |
| McHugh et al. 405 | controlled cohort study |  |  |  |  | x |  |  | x | vaccinated vs unvaccinated |
| McHugh et al. 407 | controlled cohort study |  |  |  |  | x |  |  | x | vaccinated vs unvaccinated |
| McHugh et al. 406 | controlled cohort study |  |  |  | x | x |  |  |  | vaccinated vs unvaccinated |
| McMillan et al. 409 | SR |  |  |  | x | x |  |  |  | vaccinated (Monovalent influenza A H1N1) vs unvaccinated |
| McMillan et al. 408 | SR |  | x | x | x | x |  |  |  | vaccinated vs unvaccinated; trivalent vaccine vs none; trivelent vaccine vs Pneumococcal vaccine; monovalent H1N1 vs none; monovalent vaccine different doses; monovalent vs Tetanus toxoid vaccine |
| McMorrow et al. 410 | controlled cohort study |  |  |  |  | x |  |  |  | vaccinated vs unvaccinated |
| McRae et al. 411 | case control study |  |  | x |  |  |  |  | x | vaccinated vs unvaccinated |
| Mehrabadi et al. 412 | controlled cohort study |  |  |  |  | x |  |  | x | vaccinated vs unvaccinated |
| Mohammed et al. 413 | controlled cohort study |  | x |  | x | x |  |  | x | vaccinated vs unvaccinated |
| Molgaard-Nielsen et al. 414 | controlled cohort study |  | x | x |  |  |  |  | x | vaccinated vs unvaccinated |
| Munoz et al. 417 | RCT |  |  |  | x | x | x | x | x | vaccinated with 3 types of influenza vacc (Agriflu, Fluarix, Fluzone) |
| Munoz et al. 416 | RCT |  |  |  | x | x | x |  |  | two different 2008–2009 licensed trivalent inactivated influenza vaccines (IIV3 |
| Munoz et al. 415 | controlled cohort study |  | x | x | x | x |  |  |  | vaccinated vs unvaccinated |
| Mutsaerts et al. 418 | RCT |  | x |  |  |  | x |  |  | vaccine vs placebo |
| Nakabembe et al. 419 | SR |  |  |  | x | x | x | x |  | influenza vs pneumococcal or investigational Group B streptococcal vaccine |
| Nakphook et al. 420 | controlled cohort study |  |  |  |  |  | x |  |  | vaccinated vs unvaccinated |
| Nasser et al. 421 | SR |  |  |  | x | x |  |  | x | vaccine vs placebo/no vaccine. |
| Neeman et al. 500 | controlled cohort study | preprint |  |  |  | x |  |  | x | vaccinated vs unvaccinated |
| Nordin et al. 424 | controlled cohort study |  |  |  | x | x |  |  | x | vaccinated (trivalent vs monovalent), vaccinated (monovalent) vs unvaccinated |
| Nordin et al. 422 | controlled cohort study |  |  |  | x |  |  |  |  | vaccinated vs unvaccinated |
| Nordin et al. 423 | controlled cohort study |  |  |  |  | x |  |  | x | vaccinated vs unvaccinated |
| Nunes et al. 425 | SR |  |  |  |  | x |  |  |  | vaccinated vs unvaccinated |
| Nunes et al. 427 | SR |  |  | x |  |  |  |  |  | vaccinated vs control (placebo, other vaccine or no intervention) |
| Nunes et al. 426 | RCT |  |  | x |  | x |  |  |  | vaccine (IIV) vs placebo |
| Nunes et al. 428 | test-negative design study |  | x | x |  |  |  |  |  | vaccinated vs unvaccinated |
| Ohfuji et al. 429 | controlled cohort study |  | x | x |  | x |  |  | x | vaccinated vs unvaccinated |
| Ohfuji et al. 430 | controlled cohort study |  |  |  | x | x |  |  | x | vaccinated vs unvaccinated |
| Olsen et al. 431 | controlled cohort study |  |  |  |  | x |  |  |  | vaccinated vs unvaccinated |
| Omer et al. 432 | controlled cohort study |  |  |  | x | x |  |  |  | vaccinated vs unvaccinated |
| Oppermann et al. 433 | controlled cohort study |  |  |  | x | x |  |  | x | vaccinated vs unvaccinated |
| Owusu et al. 434 | controlled cohort study |  | x |  |  |  |  |  |  | vaccinated vs unvaccinated |
| Paganoti et al. 435 | case control study |  | x |  |  |  |  |  |  | vaccinated vs unvaccinated |
| Palmsten et al. 437 | case control study |  |  |  |  | x |  |  |  | vaccinated vs unvaccinated |
| Palmsten et al. 436 | case control study |  |  |  |  | x |  |  |  | vaccinated vs unvaccinated |
| Panagiotakopoulos et al. 438 | case control study |  |  |  |  | x |  |  |  | vaccinated vs unvaccinated |
| Pasternak et al. 440 | controlled cohort study |  |  |  | x | x |  |  | x | vaccinated vs unvaccinated |
| Pasternak et al. 439 | controlled cohort study |  |  |  |  | x |  |  | x | adjuvanted influenza A(H1N1)pdm09 vs unvaccinated |
| Peppa et al. 441 | controlled cohort study |  |  |  |  | x |  |  | x | vaccinated vs unvaccinated |
| Poehling et al. 442 | controlled cohort study |  |  | x |  | x |  |  |  | vaccinated vs unvaccinated |
| Polyzos et al. 443 | SR |  |  |  |  | x |  |  | x | vaccinated (antepartum) vs unvaccinated (preconceptional maternal immunization), with inactivated influenza vaccines (seasonal trivalent or monovalent H1N1) |
| Puleston et al. 444 | controlled cohort study |  |  |  |  |  | x | x |  | vaccinated vs unvaccinated |
| Quach et al. 445 | SR |  | x |  |  |  |  |  |  | vaccinated (Trivalent inactivated influenza vaccine) vs unvaccinated; vaccinated (Trivalent inactivated influenza vaccine) vs quadrivalent meningococcal conjugate; vaccinated (Trivalent inactivated influenza vaccine) vs 23- valent pneumococcal polysacchar |
| Reeves et al. 497 | controlled cohort study |  | x |  |  |  |  |  | x | vaccinated vs unvaccinated |
| Regan et al. 448 | controlled cohort study |  |  |  |  | x |  |  |  | vaccinated vs unvaccinated |
| Regan et al. 447 | controlled cohort study |  | x |  | x |  |  |  |  | vaccinated vs unvaccinated |
| Regan et al. 449 | controlled cohort study |  |  |  | x |  |  |  | x | vaccinated (influenza vs pertussis vs influenza+pertussis) |
| Regan et al. 446 | controlled cohort study |  |  | x |  |  |  |  | x | vaccinated vs unvaccinated |
| Regan et al. 493 | controlled cohort study |  |  |  | x | x |  |  |  | vaccinated vs unvaccinated |
| Restivo et al. 450 | SR |  |  | x |  | x |  |  |  | vaccinated vs unvaccinated |
| Richards et al. 451 | controlled cohort study |  |  |  |  | x |  |  |  | vaccinated vs unvaccinated |
| Robinson et al. 452 | controlled cohort study |  |  |  | x | x |  |  | x | Vaccine exposure in 1st vs 2nd vs 3rd trimester |
| Romano et al. 453 | controlled cohort study |  |  |  | x | x |  |  | x | vaccinated (pH1N1 + nonpH1N1 vs pH1N1 only vs nonpH1N1 only) (nonpH1N1= influenza vaccine in the season prior to the index pregnancy) |
| Roque-Pereira et al. 261 | test-negative |  |  |  | x | x |  |  |  | vaccine type comparison |
| Rowe et al. 454 | controlled cohort study |  |  | x |  | x |  |  |  | vaccinated vs unvaccinated |
| Rubinstein et al. 455 | controlled cohort study |  |  |  | x | x |  |  | x | vaccinated vs unvaccinated |
| Sahni et al. 456 | test-negative design study |  |  | x |  |  |  |  | x | vaccinated vs unvaccinated, timing comparison |
| Salam et al. 457 | SR |  | x | x | x | x |  |  |  | vaccinated vs unvaccinated |
| Sammon et al. 458 | controlled cohort study |  |  |  |  | x |  |  |  | vaccinated vs unvaccinated |
| Sarna et al. 459 | controlled cohort study |  |  |  |  | x |  |  | x | vaccinated vs unvaccinated |
| Shaikh et al. 460 | cross sectional study |  |  |  | x | x |  |  |  | vaccinated vs unvaccinated |
| Shakib et al. 461 | controlled cohort study |  |  | x |  |  |  |  |  | vaccinated vs unvaccinated |
| Sheffield et al. 462 | controlled cohort study |  |  |  |  | x |  |  | x | vaccinated vs unvaccinated |
| Simoes et al. 463 | RCT |  |  |  |  | x |  |  |  | vaccinated vs placebo |
| Singh et al. 464 | controlled cohort study |  | x | x | x | x |  |  |  | vaccinated vs unvaccinated |
| Speake et al. 465 | controlled cohort study |  |  |  | x | x |  |  |  | vaccinated vs unvaccinated |
| Steinhoff et al. 466 | RCT |  | x | x | x | x | x | x |  | vaccine vs placebo |
| Steinhoff et al. 467 | RCT |  | x | x |  | x |  |  |  | Inactivated influenza vaccine vs control vaccine (pneumococcal vaccine) |
| Sugimura et al. 468 | controlled cohort study |  |  | x |  |  |  |  |  | vaccinated vs unvaccinated |
| Sukumaran et al. 469 | case control study |  |  | x |  | x |  |  |  | vaccinated vs unvaccinated |
| Thompson et al. 471 | case control study |  | x |  |  |  |  |  | x | influenza +ve vs influenza-ve |
| Thompson et al. 470 | test-negative design study |  | x |  | x |  |  |  |  | vaccinated vs. unvaccinated |
| Trotta et al. 472 | controlled cohort study |  |  |  | x | x |  |  |  | vaccinated vs unvaccinated |
| Tsai et al. 473 | controlled cohort study |  |  |  | x | x |  |  |  | MF59-adjuvanted vs unadjuvanted |
| Tunheim et al. 474 | controlled cohort study |  | x |  |  |  | x |  |  | vaccinated vs unvaccinated |
| van der Maas et al. 475 | cross sectional study |  |  |  | x | x |  |  |  | vaccinated vs unvaccinated |
| Vazquez-Benitez et al. 476 | controlled cohort study |  |  |  |  | x |  |  | x | vaccinated vs unvaccinated |
| Vesikari et al. 477 | RCT |  |  |  | x | x | x | x |  | vaccinated (IIV3 vs IIV4) |
| Vousden et al. 478 | case control study |  | x |  | x | x |  |  |  | vaccinated vs unvaccinated |
| Walsh et al. 479 | controlled cohort study |  |  |  |  | x |  |  |  | vaccinated vs unvaccinated |
| Wolfe et al. 307 | SR |  |  |  | x | x |  |  |  | influenza vaccine vs No influenza vaccine, placebo, active comparators (eg, other influenza vaccine, meningococcal or pneumococcal vaccines) |
| Wortman et al. 480 | controlled cohort study |  |  |  | x | x |  |  |  | vaccinated vs unvaccinated |
| Xie et al. 481 | cross sectional study |  |  |  |  | x |  |  | x | vaccinated (T1, T2, T3) vs unvaccinated |
| Yamada et al. 483 | cross sectional study |  | x |  |  |  |  |  |  | vaccinated vs unvaccinated |
| Yamada et al. 482 | cross-sectional study |  | x |  |  |  |  |  |  | vaccinated vs unvaccinated |
| Zaman et al. 484 | RCT |  | x | x | x |  |  |  |  | pneumococcal vs inactivated influenza vaccine |
| Zasztowt-Sternicka et al. 498 | controlled cohort study |  |  |  |  |  | x | x | x | timing |
| Zerbo et al. 485 | controlled cohort study |  |  |  | x | x |  |  |  | vaccinated vs unvaccinated |
| Zerbo et al. 486 | controlled cohort study |  |  |  |  | x |  |  | x | vaccinated vs unvaccinated (infection) |
| Zerbo et al. 499 | controlled cohort study |  |  | x |  |  |  |  | x | vaccinated vs unvaccinated |
| Zhang et al. 487 | SR |  |  |  | x | x |  |  |  | vaccinated vs unvaccinated |
| Zhao et al. 489 | RCT |  |  | x |  |  |  |  |  | influenza vs pneumococcal |
| Zhong et al. 488 | controlled cohort study |  |  |  |  |  | x | x | x | vaccinated vs unvaccinated |

## Supplementary information 9: Studies included for maternal pertussis vaccination

28,220,235,245,310-315,319,339,346,367,369,371,389,421,438,449,454,469,501-611

28 Chen, W. C. *et al.* Pilot Study on Evaluating the Impact of Tetanus, Diphtheria, and Pertussis (Tdap), Influenza, and COVID-19 Vaccinations on Antibody Responses in Pregnant Women. *Vaccines* **12** (2024). https://doi.org:10.3390/vaccines12030312

220 Deese, J. *et al.* Systematic Literature Review of Maternal Antibodies in Human Milk Following Vaccination During Pregnancy or Lactation Tetanus, Pertussis, Influenza and COVID-19. *The Pediatric infectious disease journal* **44**, S38-S42 (2025). https://doi.org:10.1097/INF.0000000000004634

235 Chittajallu, L. V. S., Kaku, R., Kondadasula, P., Lim, J. Y. & Zhumabekova, A. Safety and Efficacy of Vaccines During Pregnancy: A Systematic Review. *Cureus* **17**, e77176 (2025). https://doi.org:10.7759/cureus.77176

245 Sánchez-Salguero, E. S. *et al.* Maternal obesity associates with altered humoral immunity in blood and colostrum. *Mucosal Immunol.* **18**, 491-499 (2025). https://doi.org:10.1016/j.mucimm.2025.01.007

310 Andersen, A. R., Kolmos, S. K., Flanagan, K. L. & Benn, C. S. Systematic review and meta-analysis of the effect of pertussis vaccine in pregnancy on the risk of chorioamnionitis, non-pertussis infectious diseases and other adverse pregnancy outcomes. *Vaccine* **40**, 1572-1582 (2022). https://doi.org:10.1016/j.vaccine.2021.02.018

311 De Weerdt, L., Herzog, S. A., Van Damme, P. & Maertens, K. Timing of pertussis vaccination during pregnancy: Evidence and implementation – A systematic review. *Vaccine* **42** (2024). https://doi.org:10.1016/j.vaccine.2024.07.053

312 Gidengil, C. *et al.* *Safety of Vaccines Used for Routine Immunization in the United States: An Update*. (2021).

313 Nguyen, H. S., Vo, N. P., Chen, S. Y. & Tam, K. W. The optimal strategy for pertussis vaccination: a systematic review and meta-analysis of randomized control trials and real-world data. *Am. J. Obstet. Gynecol.* **226**, 52-67.e10 (2022). https://doi.org:10.1016/j.ajog.2021.06.096

314 Shi, Q. *et al.* Efficacy, Immunogenicity, and Safety of Pertussis Vaccine During Pregnancy: A Meta-Analysis. *Vaccines* **13** (2025). https://doi.org:10.3390/vaccines13070666

315 Simayi, A., Zhu, L. & Jin, H. Safety and Immunogenicity of Pertussis Vaccine Immunization during Pregnancy: A Meta-Analysis of Randomized Clinical Trials. *J. Trop. Med.* **2022**, 4857872 (2022). https://doi.org:10.1155/2022/4857872

319 Gidengil, C. *et al.* Safety of vaccines used for routine immunization in the United States: An updated systematic review and meta-analysis. *Vaccine* **39**, 3696-3716 (2021). https://doi.org:10.1016/j.vaccine.2021.03.079

339 Clements, T. *et al.* Update on Transplacental Transfer of IgG Subclasses: Impact of Maternal and Fetal Factors. *Front. Immunol.* **11**, 1920 (2020). https://doi.org:10.3389/fimmu.2020.01920

346 de Bruin, O. *et al.* Are maternal vaccines effective and safe for mothers and infants? A systematic review and meta-analysis of randomised controlled trials. *BMJ Global Health* **8**, 10 (2023). https://doi.org:10.1136/bmjgh-2023-012376

367 Giles, M. L., Davey, M. A. & Wallace, E. M. Associations Between Maternal Immunisation and Reduced Rates of Preterm Birth and Stillbirth: A Population Based Retrospective Cohort Study. *Front. Immunol.* **12**, 704254 (2021). https://doi.org:10.3389/fimmu.2021.704254

369 Glover, C., Crawford, N., Leeb, A., Wood, N. & Macartney, K. Active SMS-based surveillance of adverse events following immunisation with influenza and pertussis-containing vaccines in Australian pregnant women using AusVaxSafety. *Vaccine* **38**, 4892-4900 (2020). https://doi.org:10.1016/j.vaccine.2020.04.056

371 Gunatilaka, A., Rolnik, D. L. & Giles, M. L. Protective effect of maternal immunization on birth outcomes: A data linkage study. *Int. J. Gynaecol. Obstet.* **162**, 51-57 (2023). https://doi.org:10.1002/ijgo.14774

389 Ladhani, S. N. *et al.* Antibody responses after primary immunization in infants born to women receiving a pertussis-containing vaccine during pregnancy: single arm observational study with a historical comparator. *Clin. Infect. Dis.* **61**, 1637-1644 (2015). https://doi.org:10.1093/cid/civ695

421 Nasser, R. *et al.* Are all vaccines safe for the pregnant traveller? A systematic review and meta-analysis. *J. Travel Med.* **27**, 13 (2020). https://doi.org:10.1093/jtm/taz074

438 Panagiotakopoulos, L. *et al.* Evaluating the Association of Stillbirths After Maternal Vaccination in the Vaccine Safety Datalink. *Obstet. Gynecol.* **136**, 1086-1094 (2020). https://doi.org:10.1097/AOG.0000000000004166

449 Regan, A. K., Tracey, L. E., Blyth, C. C., Richmond, P. C. & Effler, P. V. A prospective cohort study assessing the reactogenicity of pertussis and influenza vaccines administered during pregnancy. *Vaccine* **34**, 2299-2304 (2016). https://doi.org:10.1016/j.vaccine.2016.03.084

454 Rowe, S. L. *et al.* Maternal Vaccination and Infant Influenza and Pertussis. *Pediatrics* **148**, 09 (2021). https://doi.org:10.1542/peds.2021-051076

469 Sukumaran, L. *et al.* Infant Hospitalizations and Mortality After Maternal Vaccination. *Pediatrics* **141**, 03 (2018). https://doi.org:10.1542/peds.2017-3310

501 Hall, C. *et al.* Receipt of Tdap or Influenza Vaccine During Pregnancy and Odds of Clinical Chorioamnionitis: A Nested Case-Control Study. *Pharmacoepidemiol. Drug Saf.* **34**, e70147 (2025). https://doi.org:https://dx.doi.org/10.1002/pds.70147

502 Abraham, C., Pichichero, M., Eisenberg, J. & Singh, S. Third-Trimester Maternal Vaccination Against Pertussis and Pertussis Antibody Concentrations. *Obstet. Gynecol.* **131**, 364-369 (2018). https://doi.org:10.1097/AOG.0000000000002438

503 Abu Raya, B. *et al.* Immunization of pregnant women against pertussis: the effect of timing on antibody avidity. *Vaccine* **33**, 1948-1952 (2015). https://doi.org:10.1016/j.vaccine.2015.02.059

504 Abu Raya, B. *et al.* The effect of timing of maternal tetanus, diphtheria, and acellular pertussis (Tdap) immunization during pregnancy on newborn pertussis antibody levels - a prospective study. *Vaccine* **32**, 5787-5793 (2014). https://doi.org:10.1016/j.vaccine.2014.08.038

505 Abu Raya, B. *et al.* The induction of breast milk pertussis specific antibodies following gestational tetanus-diphtheria-acellular pertussis vaccination. *Vaccine* **32**, 5632-5637 (2014). https://doi.org:10.1016/j.vaccine.2014.08.006

506 Abu-Raya, B. *et al.* The Effect of Tetanus-Diphtheria-Acellular-Pertussis Immunization During Pregnancy on Infant Antibody Responses: Individual-Participant Data Meta-Analysis. *Front. Immunol.* **12**, 689394 (2021). https://doi.org:10.3389/fimmu.2021.689394

507 Acosta, J., Benages, C., Díaz, M. A., Xiberta, M. & Muñiz, F. Preventing pertussis in the early infant: Development and results of a prenatal vaccination program. *Acta Medica International* **3**, 78-81 (2016). https://doi.org:10.5530/ami.2016.2.17

508 Amirthalingam, G. *et al.* Effectiveness of maternal pertussis vaccination in England: an observational study. *Lancet* **384**, 1521-1528 (2014). https://doi.org:10.1016/S0140-6736(14)60686-3

509 Amirthalingam, G. *et al.* Optimization of Timing of Maternal Pertussis Immunization From 6 Years of Postimplementation Surveillance Data in England. *Clin. Infect. Dis.* **76**, e1129-e1139 (2023). https://doi.org:10.1093/cid/ciac651

510 Barug, D. *et al.* Maternal pertussis vaccination and its effects on the immune response of infants aged up to 12 months in the Netherlands: an open-label, parallel, randomised controlled trial. *The Lancet Infectious Diseases* **19**, 392-401 (2019). https://doi.org:10.1016/S1473-3099(18)30717-5

511 Baxter, R., Bartlett, J., Fireman, B., Lewis, E. & Klein, N. P. Effectiveness of Vaccination During Pregnancy to Prevent Infant Pertussis. *Pediatrics* **139** (2017). https://doi.org:10.1542/peds.2016-4091

512 Becerra-Culqui, T. A., Getahun, D., Chiu, V., Sy, L. S. & Tseng, H. F. Prenatal Tetanus, Diphtheria, Acellular Pertussis Vaccination and Autism Spectrum Disorder. *Pediatrics* **142**, 09 (2018). https://doi.org:10.1542/peds.2018-0120

513 Becerra-Culqui, T. A., Getahun, D., Chiu, V., Sy, L. S. & Tseng, H. F. The Association of Prenatal Tetanus, Diphtheria, and Acellular Pertussis (Tdap) Vaccination With Attention-Deficit/Hyperactivity Disorder. *Am. J. Epidemiol.* **189**, 1163-1172 (2020). https://doi.org:10.1093/aje/kwaa074

514 Becker-Dreps, S. *et al.* Effectiveness of Prenatal Tetanus, Diphtheria, Acellular Pertussis Vaccination in the Prevention of Infant Pertussis in the U.S. *Am. J. Prev. Med.* **55**, 159-166 (2018). https://doi.org:10.1016/j.amepre.2018.04.013

515 Bellido-Blasco, J., Guiral-Rodrigo, S., Miguez-Santiyan, A., Salazar-Cifre, A. & Gonzalez-Moran, F. A case-control study to assess the effectiveness of pertussis vaccination during pregnancy on newborns, Valencian community, Spain, 1 March 2015 to 29 February 2016. *Euro Surveillance: Bulletin Europeen sur les Maladies Transmissibles = European Communicable Disease Bulletin* **22**, 01 (2017). https://doi.org:10.2807/1560-7917.ES.2017.22.22.30545

516 Berenson, A. B. *et al.* Maternal and infant outcomes among women vaccinated against pertussis during pregnancy. *Hum. Vaccin. Immunother.* **12**, 1965-1971 (2016). https://doi.org:10.1080/21645515.2016.1157241

517 Bosch, J. J. *et al.* Seroprevalence of Bordetella pertussis among vaccinated and unvaccinated pregnant women and newborn infants in a university hospital of Buenos Aires. *Arch. Argent. Pediatr.* **115**, 311-315 (2017). https://doi.org:10.5546/aap.2017.311

518 Bosch, J. J. *et al.* Seroprevalence of Bordetella pertussis among vaccinated and unvaccinated pregnant women and newborn infants in a university hospital of Buenos Aires. *Arch. Argent. Pediatr.* **115**, 311-315 (2017). https://doi.org:10.5546/aap.2017.eng.311

519 Brousseau, N. *et al.* Vaccination during pregnancy and modulation of IgG response to pertussis vaccines in infants: The impact of different vaccine formulations. *Vaccine* **42**, 2138-2143 (2024). https://doi.org:10.1016/j.vaccine.2024.03.015

520 Calvert, A. *et al.* Optimising the timing of whooping cough immunisation in mums (OpTIMUM) through investigating pertussis vaccination in pregnancy: an open-label, equivalence, randomised controlled trial. *The Lancet. Microbe* **4**, e300-e308 (2023). https://doi.org:10.1016/S2666-5247(22)00332-9

521 Campbell, H. *et al.* Review of vaccination in pregnancy to prevent pertussis in early infancy. *J. Med. Microbiol.* **67**, 1426-1456 (2018). https://doi.org:10.1099/jmm.0.000829

522 Cheuvart, B., Callegaro, A., Rosillon, D., Meyer, N. & Guignard, A. Effectiveness of maternal immunisation with a three-component acellular pertussis vaccine at preventing pertussis in infants in the United States: Post-hoc analysis of a case-control study using Bayesian dynamic borrowing. *Vaccine* **41**, 5805-5812 (2023). https://doi.org:10.1016/j.vaccine.2023.07.057

523 Chokephaibulkit, K. *et al.* Effective and safe transfer of maternal antibodies persisting two months postpartum following maternal immunization with different doses of recombinant pertussis-containing vaccines. *Vaccine* **42**, 383-395 (2024). https://doi.org:10.1016/j.vaccine.2023.11.042

524 Chong, C. Y. *et al.* Effectiveness of maternal pertussis vaccination in Singapore: A test-negative case-control study. *Vaccine* **40**, 6570-6574 (2022). https://doi.org:10.1016/j.vaccine.2022.09.087

525 D'Heilly, C., Switzer, C. & Macina, D. Safety of Maternal Immunization Against Pertussis: A Systematic Review. *Infectious Diseases & Therapy* **8**, 543-568 (2019). https://doi.org:10.1007/s40121-019-00265-6

526 Dabrera, G. *et al.* A case-control study to estimate the effectiveness of maternal pertussis vaccination in protecting newborn infants in England and Wales, 2012-2013. *Clin. Infect. Dis.* **60**, 333-337 (2015). https://doi.org:10.1093/cid/ciu821

527 DeSilva, M. *et al.* Maternal Tdap vaccination and risk of infant morbidity. *Vaccine* **35**, 3655-3660 (2017). https://doi.org:10.1016/j.vaccine.2017.05.041

528 Donegan, K., King, B. & Bryan, P. Safety of pertussis vaccination in pregnant women in UK: observational study. *BMJ* **349**, g4219 (2014). https://doi.org:10.1136/bmj.g4219

529 Eberhardt, C. S. *et al.* Maternal Immunization Earlier in Pregnancy Maximizes Antibody Transfer and Expected Infant Seropositivity Against Pertussis. *Clin. Infect. Dis.* **62**, 829-836 (2016). https://doi.org:10.1093/cid/ciw027

530 Eberhardt, C. S. *et al.* Pertussis Antibody Transfer to Preterm Neonates After Second- Versus Third-Trimester Maternal Immunization. *Clin. Infect. Dis.* **64**, 1129-1132 (2017). https://doi.org:10.1093/cid/cix046

531 Fakhraei, R. *et al.* Obstetric and perinatal health outcomes after pertussis vaccination during pregnancy in Ontario, Canada: a retrospective cohort study. *CMAJ open* **9**, E349 (2021). https://doi.org:10.9778/cmajo.20200239

532 Fallo, A. A. *et al.* Prevalence of Pertussis Antibodies in Maternal Blood, Cord Serum, and Infants From Mothers With and Those Without Tdap Booster Vaccination During Pregnancy in Argentina. *Journal of the Pediatric Infectious Diseases Societ* **7**, 11-17 (2018). https://doi.org:10.1093/jpids/piw069

533 Febriani, Y. *et al.* Tdap vaccine in pregnancy and immunogenicity of pertussis and pneumococcal vaccines in children: What is the impact of different immunization schedules? *Vaccine* **41**, 6745-6753 (2023). https://doi.org:10.1016/j.vaccine.2023.09.063

534 Fernandes, E. G. *et al.* The effectiveness of maternal pertussis vaccination in protecting newborn infants in Brazil: A case-control study. *Vaccine* **37**, 5481-5484 (2019). https://doi.org:10.1016/j.vaccine.2019.03.049

535 Florea, A. *et al.* Investigating Tetanus, Diphtheria, Acellular Pertussis Vaccination During Pregnancy and Risk of Congenital Anomalies. *Infectious Diseases & Therapy* **12**, 411-423 (2023). https://doi.org:10.1007/s40121-022-00731-8

536 Furuta, M., Sin, J., Ng, E. S. W. & Wang, K. Efficacy and safety of pertussis vaccination for pregnant women - a systematic review of randomised controlled trials and observational studies. *BMC Pregnancy Childbirth* **17**, 390 (2017). https://doi.org:10.1186/s12884-017-1559-2

537 Gall, S. A., Myers, J. & Pichichero, M. Maternal immunization with tetanus-diphtheria-pertussis vaccine: effect on maternal and neonatal serum antibody levels. *Am. J. Obstet. Gynecol.* **204**, 334.e331-335 (2011). https://doi.org:10.1016/j.ajog.2010.11.024

538 Ghalandari, N. *et al.* Maternal and neonatal antibody levels on pertussis vaccination in pregnant women on immune-modulating therapy for rheumatic disease. *RMD Open* **9**, 08 (2023). https://doi.org:10.1136/rmdopen-2023-002985

539 Gkentzi, D. *et al.* Maternal vaccination against pertussis: a systematic review of the recent literature. *Archives of Disease in Childhood Fetal & Neonatal Edition* **102**, F456-F463 (2017). https://doi.org:10.1136/archdischild-2016-312341

540 Godoy, P. *et al.* Effectiveness of maternal pertussis vaccination in protecting newborn: A matched case-control study. *J. Infect.* **83**, 554-558 (2021). https://doi.org:10.1016/j.jinf.2021.08.022

541 Gomme, J. *et al.* The Impact of Timing of Pertussis Vaccination During Pregnancy on Infant Antibody Levels at Birth: A Multi-Country Analysis. *Front. Immunol.* **13**, 913922 (2022). https://doi.org:10.3389/fimmu.2022.913922

542 Greenberg, V. *et al.* Tdap vaccination during pregnancy and risk of chorioamnionitis and related infant outcomes. *Vaccine* **41**, 3429-3435 (2023). https://doi.org:10.1016/j.vaccine.2023.04.043

543 Griffin, J. B. *et al.* Pertussis Immunisation in Pregnancy Safety (PIPS) Study: A retrospective cohort study of safety outcomes in pregnant women vaccinated with Tdap vaccine. *Vaccine* **36**, 5173-5179 (2018). https://doi.org:10.1016/j.vaccine.2018.07.011

544 Hall, C. *et al.* Safety of tetanus, diphtheria, and acellular pertussis vaccination among pregnant active duty U.S. military women. *Vaccine* **38**, 1982-1988 (2020). https://doi.org:10.1016/j.vaccine.2020.01.009

545 Halperin, S. A. *et al.* A Randomized Controlled Trial of the Safety and Immunogenicity of Tetanus, Diphtheria, and Acellular Pertussis Vaccine Immunization During Pregnancy and Subsequent Infant Immune Response. *Clin. Infect. Dis.* **67**, 1063-1071 (2018). https://doi.org:10.1093/cid/ciy244

546 Hardy-Fairbanks, A. J. *et al.* Immune responses in infants whose mothers received Tdap vaccine during pregnancy. *Pediatr. Infect. Dis. J.* **32**, 1257-1260 (2013). https://doi.org:10.1097/INF.0b013e3182a09b6a

547 Healy, C. M. *et al.* Association Between Third-Trimester Tdap Immunization and Neonatal Pertussis Antibody Concentration. *JAMA* **320**, 1464-1470 (2018). https://doi.org:10.1001/jama.2018.14298

548 Hincapie-Palacio, D. *et al.* Effect of maternal immunization against pertussis in Medellin and the metropolitan area, Colombia, 2016-2017. *Vaccine* **36**, 3984-3991 (2018). https://doi.org:10.1016/j.vaccine.2018.05.020

549 Hoang, H. T. *et al.* Pertussis vaccination during pregnancy in Vietnam: Results of a randomized controlled trial Pertussis vaccination during pregnancy. *Vaccine* **34**, 151-159 (2016). https://doi.org:10.1016/j.vaccine.2015.10.098

550 Immink, M. M. *et al.* Reactogenicity and safety of second trimester maternal tetanus, diphtheria and acellular pertussis vaccination in the Netherlands. *Vaccine* **41**, 1074-1080 (2023). https://doi.org:10.1016/j.vaccine.2022.12.061

551 Jones, C. E. *et al.* A phase IV, multi-centre, randomized clinical trial comparing two pertussis-containing vaccines in pregnant women in England and vaccine responses in their infants. *BMC Med.* **19**, 138 (2021). https://doi.org:10.1186/s12916-021-02005-5

552 Juscamayta-Lopez, E., Valdivia, F., Soto, M. P., Horna, H. & Pajuelo, M. Case-Control Study to Estimate the Association Between Tdap Vaccination During Pregnancy and Reduced Risk of Pertussis in Newborn Infants in Peru, 2019-2021. *Open Forum Infectious Diseases* **10**, ofad325 (2023). https://doi.org:10.1093/ofid/ofad325

553 Kandeil, W. *et al.* A systematic review of the burden of pertussis disease in infants and the effectiveness of maternal immunization against pertussis. *Expert Review of Vaccines* **19**, 621-638 (2020). https://doi.org:10.1080/14760584.2020.1791092

554 Kent, A. *et al.* Pertussis Antibody Concentrations in Infants Born Prematurely to Mothers Vaccinated in Pregnancy. *Pediatrics* **138**, 07 (2016). https://doi.org:10.1542/peds.2015-3854

555 Kerr, S. M., Van Bennekom, C. M. & Mitchell, A. A. Tetanus, diphtheria, and pertussis vaccine (Tdap) in pregnancy and risk of major birth defects in the offspring. *Birth Defects Research* **112**, 393-403 (2020). https://doi.org:10.1002/bdr2.1642

556 Kharbanda, E. O. *et al.* Evaluation of the association of maternal pertussis vaccination with obstetric events and birth outcomes. *JAMA* **312**, 1897-1904 (2014). https://doi.org:10.1001/jama.2014.14825

557 Kharbanda, E. O. *et al.* Maternal Tdap vaccination: Coverage and acute safety outcomes in the vaccine safety datalink, 2007-2013. *Vaccine* **34**, 968-973 (2016). https://doi.org:10.1016/j.vaccine.2015.12.046

558 Khodr, Z. G., Bukowinski, A. T., Gumbs, G. R. & Conlin, A. M. S. Tetanus, diphtheria, and acellular pertussis vaccination during pregnancy and reduced risk of infant acute respiratory infections. *Vaccine* **35**, 5603-5610 (2017). https://doi.org:10.1016/j.vaccine.2017.08.041

559 Knuutila, A. *et al.* Effect of immunization during pregnancy and pre-existing immunity on diphtheria-tetanus-acellular pertussis vaccine responses in infants. *Emerging Microbes & Infections* **12**, 2204146 (2023). https://doi.org:10.1080/22221751.2023.2204146

560 Laverty, M. *et al.* Health Outcomes in Young Children Following Pertussis Vaccination During Pregnancy. *Pediatrics* **147**, 05 (2021). https://doi.org:10.1542/peds.2020-042507

561 Layton, J. B. *et al.* Prenatal Tdap immunization and risk of maternal and newborn adverse events. *Vaccine* **35**, 4072-4078 (2017). https://doi.org:10.1016/j.vaccine.2017.06.071

562 Lima, L. *et al.* Acquisition of specific antibodies and their influence on cell-mediated immune response in neonatal cord blood after maternal pertussis vaccination during pregnancy. *Vaccine* **37**, 2569-2579 (2019). https://doi.org:10.1016/j.vaccine.2019.03.070

563 Machado, L. Z. & Marcon, C. E. M. Pertussis incidence in children under 1 year old and relation with maternal vaccination in Brazil, 2008-2018. *Epidemiologia e Servicos de Saude* **31**, e2021625 (2022). https://doi.org:10.1590/S1679-49742022000100029

564 Maertens, K. *et al.* Pertussis vaccination during pregnancy in Belgium: Results of a prospective controlled cohort study. *Vaccine* **34**, 142-150 (2016). https://doi.org:10.1016/j.vaccine.2015.10.100

565 Maertens, K. *et al.* Pertussis Immunization During Pregnancy: Assessment of the Role of Maternal Antibodies on Immune Responses in Term and Preterm-Born Infants. *Clin. Infect. Dis.* **74**, 189-198 (2022). https://doi.org:10.1093/cid/ciab424

566 Maertens, K., Orije, M. R. P., Huoi, C., Boisnard, F. & Lyabis, O. Immunogenicity of a liquid hexavalent DTaP-IPV-HB-PRP~T vaccine after primary and booster vaccination of term and preterm infants born to women vaccinated with Tdap during pregnancy. *Vaccine* **41**, 795-804 (2023). https://doi.org:10.1016/j.vaccine.2022.12.021

567 Maertens, K., Tran, T. M. P., Hens, N., Van Damme, P. & Leuridan, E. Effect of Prepregnancy Pertussis Vaccination in Young Infants. *J. Infect. Dis.* **215**, 1855-1861 (2017). https://doi.org:10.1093/infdis/jix176

568 McMillan, M. *et al.* Safety of Tetanus, Diphtheria, and Pertussis Vaccination During Pregnancy: A Systematic Review. *Obstet. Gynecol.* **129**, 560-573 (2017). https://doi.org:10.1097/AOG.0000000000001888

569 Merdrignac, L. *et al.* Effectiveness of pertussis vaccination in pregnancy to prevent hospitalisation in infants aged <2 months and effectiveness of both primary vaccination and mother's vaccination in pregnancy in infants aged 2-11 months. *Vaccine* **40**, 6374-6382 (2022). https://doi.org:10.1016/j.vaccine.2022.09.054

570 Mohammed, H. *et al.* Safety of maternal pertussis vaccination on pregnancy and birth outcomes: A prospective cohort study. *Vaccine* **39**, 324-331 (2021). https://doi.org:10.1016/j.vaccine.2020.11.052

571 Morgan, J. L., Baggari, S. R., McIntire, D. D. & Sheffield, J. S. Pregnancy outcomes after antepartum tetanus, diphtheria, and acellular pertussis vaccination. *Obstet. Gynecol.* **125**, 1433-1438 (2015). https://doi.org:10.1097/AOG.0000000000000862

572 Mott, K., Huybrechts, K. F., Glynn, R. J., Mogun, H. & Hernandez-Diaz, S. Tetanus, Diphtheria, Acellular Pertussis Vaccination During Pregnancy and Risk of Pertussis in the Newborn in Publicly and Privately Insured Mother-infant Pairs in the United States. *Pediatr. Infect. Dis. J.* **40**, 681-687 (2021). https://doi.org:10.1097/INF.0000000000003099

573 Munoz, F. M. *et al.* Safety and immunogenicity of tetanus, diphtheria, and acellular pertussis immunization during pregnancy in mothers and infants: A randomized clinical trial. *Obstet. Gynecol. Surv.* **69**, 517-519 (2014). https://doi.org:10.1097/OGX.0000000000000101

574 Naidu, M. A., Muljadi, R., Davies-Tuck, M. L., Wallace, E. M. & Giles, M. L. The optimal gestation for pertussis vaccination during pregnancy: a prospective cohort study. *Am. J. Obstet. Gynecol.* **215**, 237.e231-236 (2016). https://doi.org:10.1016/j.ajog.2016.03.002

575 Nascimento, R. M. D. *et al.* Protective effect of exclusive breastfeeding and effectiveness of maternal vaccination in reducing pertussis-like illness. *J. Pediatr. (Rio J.)* **97**, 500-507 (2021). https://doi.org:10.1016/j.jped.2020.10.018

576 Orije, M. R. P. *et al.* Impact of Maternal Pertussis Antibodies on the Infants' Cellular Immune Responses. *Clin. Infect. Dis.* **75**, 442-452 (2022). https://doi.org:10.1093/cid/ciab972

577 Perrett, K. P. *et al.* Impact of tetanus-diphtheria-acellular pertussis immunization during pregnancy on subsequent infant immunization seroresponses: follow-up from a large randomized placebo-controlled trial. *Vaccine* **38**, 2105-2114 (2020). https://doi.org:10.1016/j.vaccine.2019.10.104

578 Perrett, K. P. *et al.* Immunogenicity, transplacental transfer of pertussis antibodies and safety following pertussis immunization during pregnancy: Evidence from a randomized, placebo-controlled trial. *Vaccine* **38**, 2095-2104 (2020). https://doi.org:10.1016/j.vaccine.2019.10.105

579 Petousis-Harris, H. *et al.* A Retrospective Cohort Study of Safety Outcomes in New Zealand Infants Exposed to Tdap Vaccine in Utero. **7**, 11 (2019). https://doi.org:10.3390/vaccines7040147

580 Puthanakit, T. *et al.* A phase 2 randomized controlled dose-ranging trial of recombinant pertussis booster vaccines containing genetically inactivated pertussis toxin in pregnant women. *Vaccine* **41**, 4541-4553 (2023). https://doi.org:10.1016/j.vaccine.2023.06.001

581 Regan, A. K. *et al.* Maternal Pertussis Vaccination, Infant Immunization, and Risk of Pertussis. *Pediatrics* **152**, 01 (2023). https://doi.org:10.1542/peds.2023-062664

582 Rice, T. F. *et al.* Modification of innate immune responses to Bordetella pertussis in babies from pertussis vaccinated pregnancies. *EBioMedicine* **72** (2021). https://doi.org:10.1016/j.ebiom.2021.103612

583 Rice, T. F. *et al.* Antibody responses to Bordetella pertussis and other childhood vaccines in infants born to mothers who received pertussis vaccine in pregnancy - a prospective, observational cohort study from the United Kingdom. *Clin. Exp. Immunol.* **197**, 1-10 (2019). https://doi.org:10.1111/cei.13275

584 Romanin, V. *et al.* Maternal Vaccination in Argentina: Tetanus, Diphtheria, and Acellular Pertussis Vaccine Effectiveness During Pregnancy in Preventing Pertussis in Infants <2 Months of Age. *Clin. Infect. Dis.* **70**, 380-387 (2020). https://doi.org:10.1093/cid/ciz217

585 Ruiz-Botia, I. *et al.* Impact of vaccinating pregnant women against pertussis on hospitalizations of children under one year of age in a tertiary hospital in Catalonia. *Enferm. Infecc. Microbiol. Clin.* **18**, 18 (2021). https://doi.org:10.1016/j.eimc.2021.04.004

586 Sahoo, N., Agarwal, R., Gururaja, R. & Katoch, D. Are Early Infants Adequately Protected against Pertussis: An Experience from a Tertiary Care Centre in India. *International Journal of Pharmaceutical and Clinical Research* **16**, 487-493 (2024).

587 Sancovski, M. *et al.* Safety of reduced antigen content diphtheria-tetanus-acellular pertussis vaccine when administered during pregnancy as part of the maternal immunization program in Brazil: a single center, observational, retrospective, cohort study. *Hum. Vaccin. Immunother.* **15**, 2873-2881 (2019). https://doi.org:10.1080/21645515.2019.1627161

588 Sapuan, S. *et al.* An observational, cohort, multi-centre, open label phase IV extension study comparing preschool DTAP-IPV booster vaccine responses in children whose mothers were randomised to one of two pertussis-containing vaccines or received no pertussis-containing vaccine in pregnancy in England. *Vaccine* **40**, 7050-7056 (2022). https://doi.org:10.1016/j.vaccine.2022.10.005

589 Sartoretti, J. *et al.* Influence of Timing of Maternal Pertussis Immunization on the Avidity of Transferred Antibodies in Term and Preterm Neonates. *Clin. Infect. Dis.* **77**, 645-648 (2023). https://doi.org:10.1093/cid/ciad227

590 Saul, N. *et al.* Effectiveness of maternal pertussis vaccination in preventing infection and disease in infants: The NSW Public Health Network case-control study. *Vaccine* **36**, 1887-1892 (2018). https://doi.org:10.1016/j.vaccine.2018.02.047

591 Shakib, J. H. *et al.* Tetanus, diphtheria, acellular pertussis vaccine during pregnancy: pregnancy and infant health outcomes. *J. Pediatr.* **163**, 1422-1426.e1421-1424 (2013). https://doi.org:10.1016/j.jpeds.2013.06.021

592 Skoff, T. H. *et al.* Impact of the US Maternal Tetanus, Diphtheria, and Acellular Pertussis Vaccination Program on Preventing Pertussis in Infants <2 Months of Age: A Case-Control Evaluation. *Clin. Infect. Dis.* **65**, 1977-1983 (2017). https://doi.org:10.1093/cid/cix724

593 Sompagdee, N. *et al.* Seroprevalence of Bordetella pertussis antibodies and anti-pertussis antibody response after a single dose of reduced-antigen combined diphtheria, tetanus, and acellular pertussis vaccine (Tdap) in pregnant Thai women. *Vaccine* **38**, 2725-2733 (2020). https://doi.org:10.1016/j.vaccine.2020.01.074

594 Switzer, C., D'Heilly, C. & Macina, D. Immunological and Clinical Benefits of Maternal Immunization Against Pertussis: A Systematic Review. *Infectious Diseases & Therapy* **8**, 499-541 (2019). https://doi.org:10.1007/s40121-019-00264-7

595 Tseng, H. F. *et al.* Safety of tetanus, diphtheria, acellular pertussis (Tdap) vaccination during pregnancy. *Vaccine* **40**, 4503-4512 (2022). https://doi.org:10.1016/j.vaccine.2022.06.009

596 Vargas-Zambrano, J. C. *et al.* Prenatal tetanus-diphtheria-acellular pertussis vaccine effectiveness at preventing infant pertussis. *Vaccine* **41**, 2968-2975 (2023). https://doi.org:10.1016/j.vaccine.2023.03.048

597 Vaz-de-Lima, L. R. A. *et al.* Effect of maternal Tdap on infant antibody response to a primary vaccination series with whole cell pertussis vaccine in São Paulo, Brazil. *Vaccine: X* **7** (2021). https://doi.org:10.1016/j.jvacx.2021.100087

598 Vaz-de-Lima, L. R. A. *et al.* Association between the timing of maternal vaccination and newborns' anti-pertussis toxin antibody levels. *Vaccine* **37**, 5474-5480 (2019). https://doi.org:10.1016/j.vaccine.2019.04.079

599 Villarreal Perez, J. Z. *et al.* Randomized clinical trial of the safety and immunogenicity of the Tdap vaccine in pregnant Mexican women. *Hum. Vaccin. Immunother.* **13**, 128-135 (2017). https://doi.org:10.1080/21645515.2016.1232786

600 Vygen-Bonnet, S. *et al.* Safety and effectiveness of acellular pertussis vaccination during pregnancy: a systematic review. *BMC Infect. Dis.* **20**, 136 (2020). https://doi.org:10.1186/s12879-020-4824-3

601 Wanlapakorn, N. *et al.* Quantity and Quality of Antibodies After Acellular Versus Whole-cell Pertussis Vaccines in Infants Born to Mothers Who Received Tetanus, Diphtheria, and Acellular Pertussis Vaccine During Pregnancy: A Randomized Trial. *Clin. Infect. Dis.* **71**, 72-80 (2020). https://doi.org:10.1093/cid/ciz778

602 Winter, K., Cherry, J. D. & Harriman, K. Effectiveness of Prenatal Tetanus, Diphtheria, and Acellular Pertussis Vaccination on Pertussis Severity in Infants. *Clin. Infect. Dis.* **64**, 9-14 (2017). https://doi.org:10.1093/cid/ciw633

603 Winter, K., Nickell, S., Powell, M. & Harriman, K. Effectiveness of Prenatal Versus Postpartum Tetanus, Diphtheria, and Acellular Pertussis Vaccination in Preventing Infant Pertussis. *Clin. Infect. Dis.* **64**, 3-8 (2017). https://doi.org:10.1093/cid/ciw634

604 Zerbo, O. *et al.* Kaiser Permanente Northern California pregnancy database: Description and proof of concept study. *Vaccine* **34**, 5519-5523 (2016). https://doi.org:10.1016/j.vaccine.2016.10.006

605 Daniel, O. *et al.* Pertussis antibody responses in infants born to mothers vaccinated at different time points in pregnancy. *Vaccine* **62**, 127481 (2025). https://doi.org:10.1016/j.vaccine.2025.127481

606 Kildegaard, H. *et al.* Safety of pertussis vaccination in pregnancy and effectiveness in infants: A Danish national cohort study 2019-2023. *Clinical microbiology and infection : the official publication of the European Society of Clinical Microbiology and Infectious Diseases* (2025). https://doi.org:10.1016/j.cmi.2025.03.014

607 Skoff, T. H. *et al.* Impact of the US Maternal Tetanus Toxoid, Reduced Diphtheria Toxoid, and Acellular Pertussis (Tdap) Vaccination Program on Preventing Pertussis in Infants 2 to <6 Months of Age: A Case-Control Evaluation. *Open Forum Infectious Diseases* **11** (2024). https://doi.org:10.1093/ofid/ofae655

608 Chaithongwongwatthana, S. *et al.* Transplacental transfer of maternal antibodies following immunization with recombinant pertussis vaccines during pregnancy: Real-world evidence. *Int. J. Infect. Dis.* **144** (2024). https://doi.org:10.1016/j.ijid.2024.107047

609 Immink, M. M. *et al.* Maternal Pertussis Immunization and Immunoglobulin G Levels in Early- to Late-Term and Preterm Infants. *JAMA Network Open* **7** (2024). https://doi.org:10.1001/jamanetworkopen.2024.24608

610 Nakabembe, E. *et al.* Safety and immunogenicity of an acellular pertussis vaccine containing genetically detoxified pertussis toxin administered to pregnant women living with and without HIV and their newborns (WoMANPOWER): a randomised controlled trial in Uganda. *The Lancet. Global health* **13**, e81‐e97 (2025). https://doi.org:10.1016/S2214-109X(24)00409-1

611 Saso, A. *et al.* The effect of pertussis vaccination in pregnancy on the immunogenicity of acellular or whole-cell pertussis vaccination in Gambian infants (GaPS): a single-centre, randomised, controlled, double-blind, phase 4 trial. *The lancet. Infectious diseases* **25**, 909‐924 (2025). https://doi.org:10.1016/S1473-3099(25)00072-6

## Supplementary information 10: Characteristics of maternal pertussis studies and evidence syntheses

| Author | Study Design | Efficacy maternal health outcome | Efficacy infant health outcome | Harms maternal health | Harms infant health | Immunogenicity Mother | Immunogenicity Child | Timing during pregnancy | Comparison |
| --- | --- | --- | --- | --- | --- | --- | --- | --- | --- |
| Abraham et al. 502 | controlled cohort study |  |  |  |  | x | x | x | timing (27–30 6/7 weeks vs 31–35 6/7weeks) |
| Abu Raya et al. 504 | controlled cohort study |  |  | x |  | x | x | x | vaccinated vs unvaccinated |
| Abu Raya et al. 503 | controlled cohort study |  |  | x |  |  | x | x | vaccinated vs unvaccinated |
| Abu Raya et al. 505 | controlled cohort study |  |  |  |  | x |  |  | vaccinated vs unvaccinated |
| Abu-Raya et al. 506 | SR |  |  |  |  | x | x |  | vaccinated (Tdap) vs unvaccinated |
| Acosta et al. 507 | case control study |  | x |  | x |  |  |  | vaccinated vs unvaccinated |
| Amirthalingam et al. 509 | controlled cohort study |  | x |  |  |  |  | x | vaccinated vs unvaccinated |
| Amirthalingam et al. 508 | controlled cohort study |  | x |  | x |  |  | x | vaccinated vs unvaccinated |
| Andersen et al. 310 | SR |  |  | x | x |  |  |  | Tdap vs placebo/ non-live vaccines |
| Barug et al. 510 | RCT |  |  |  |  |  | x |  | vaccinated vs control (vaccinated after delivery) |
| Baxter et al. 511 | controlled cohort study |  | x |  |  |  |  |  | vaccinated vs unvaccinated, dose comparison (1 vs 2 vs 3 doses) |
| Becerra-Culqui et al. 512 | controlled cohort study |  |  | x | x |  |  |  | unvaccinated vs vaccinated |
| Becerra-Culqui et al. 513 | controlled cohort study |  |  |  | x |  |  |  | vaccinated vs unvaccinated |
| Becker-Dreps et al. 514 | controlled cohort study |  | x |  |  |  |  | x | vaccinated (before and after 27 weeks) vs nonvaccinated |
| Bellido-Blasco et al. 515 | case control study |  | x |  |  |  |  |  | vaccinated vs unvaccinated |
| Berenson et al. 516 | controlled cohort study |  |  | x | x |  |  |  | unvaccinated vs vaccinated |
| Bosch et al. 517 | controlled cohort study |  |  |  |  |  | x |  | vaccinated vs unvaccinated |
| Bosch et al. 518 | cross sectional study |  |  |  |  |  | x |  | vaccinated vs unvaccinated |
| Brousseau et al. 519 | RCT |  |  |  |  |  | x |  | vaccinated (Tdap5- vs Td), stratified by infant vaccine |
| Calvert et al. 520 | RCT |  |  | x |  | x | x | x | timing comparison (  ≤23weeks+6 days vs 24–27 weeks+6 days vs 28–31 weeks+6 days) |
| Campbell et al. 521 | SR |  | x | x | x | x | x | x | vaccinated vs unvaccinated |
| Chaithongwongwatthana et al. 608 | controlled cohort study |  |  | x | x |  | x | x | vaccinated vs unvaccinated |
| Chen et al. 28 | controlled cohort study |  |  |  |  |  | x |  | vaccinated with 3 doses of COVID vs 4 doses with pertussis only or pertussis+ influenza |
| Cheuvart et al. 522 | case control study |  | x |  |  |  |  | x | vaccinated (T3) vs unvaccinated |
| Chittajallu et al. 235 | SR |  |  | x | x | x | x |  | vaccinated vs unvaccinated or placebo |
| Chokephaibulkit et al. 523 | RCT |  |  | x | x | x | x | x | vaccinated with pertussis-only vaccine vs chemically-inactivated acellular pertussis |
| Chong et al. 524 | case control study |  | x |  |  |  |  |  | vaccinated vs unvaccinated |
| Clements et al. 339 | controlled cohort study |  |  |  |  | x | x |  | vaccinated vs unvaccinated |
| Dabrera et al. 526 | case control study |  | x |  |  |  |  |  | vaccinated vs unvaccinated |
| Daniel et al. 605 | RCT |  |  |  |  |  | x | x | vaccinated (vaccinated at different gestational weeks) vs unvaccinated |
| de Bruin et al. 346 | SR |  | x |  | x |  |  |  | vaccine vs placebo/no vaccine |
| Deese et al. 220 | SR |  | x |  |  | x |  |  | vaccinated vs unvaccinated |
| DeSilva et al. 527 | controlled cohort study |  |  | x | x |  |  |  | vaccinated vs unvaccinated |
| De Weerdt et al. 311 | SR |  | x | x | x |  | x | x | vaccinated vs unvaccinated |
| D'Heilly et al. 525 | SR |  |  | x | x |  |  |  | vaccine vs placebo or nothing |
| Donegan et al. 528 | controlled cohort study |  |  | x | x |  |  |  | vaccinated vs unvaccinated |
| Eberhardt et al. 529 | controlled cohort study |  |  |  |  |  | x | x | vaccinated (2nd trimester vs 3rd trimester) |
| Eberhardt et al. 530 | controlled cohort study |  |  |  |  |  | x | x | vaccinated (2nd trimester vs 3rd trimester) |
| Fakhraei et al. 531 | controlled cohort study |  |  | x | x |  |  |  | vaccinated vs unvaccinated |
| Fallo et al. 532 | controlled cohort study |  |  |  |  | x | x | x | vaccinated vs unvaccinated |
| Febriani et al. 533 | controlled cohort study |  |  |  |  |  | x |  | vaccinated vs unvaccinated |
| Fernandes et al. 534 | case control study |  | x |  |  |  |  |  | vaccinated vs unvaccinated |
| Florea et al. 535 | controlled cohort study |  |  |  | x |  |  |  | vaccinated vs unvaccianted |
| Furuta et al. 536 | SR |  | x | x | x | x | x |  | vaccinated vs unvaccinated |
| Gall et al. 537 | controlled cohort study |  |  |  |  |  | x |  | vaccinated vs unvaccinated |
| Ghalandari et al. 538 | controlled cohort study |  |  |  |  | x | x |  | vaccinated women exposed to TNFi vs not exposed to TNFi vs historical cohort of healthy vaccinated pregnant women |
| Gidengil et al. 312,319 | SR |  |  | x | x |  |  | x | Tdap vs placebo or base treatment also received by the control groups; Tdap vs TT |
| Giles et al. 367 | controlled cohort study |  |  | x | x |  |  |  | vaccinated vs unvaccinated |
| Gkentzi et al. 539 | SR |  | x | x | x |  |  |  | vaccinated vs placebo/unvaccinated |
| Glover et al. 369 | controlled cohort study |  |  | x |  |  |  | x | IIV alone vs dTpa alone vs IIV&dTpa |
| Godoy et al. 540 | case control study |  | x |  |  |  |  | x | vaccinated vs unvaccinated |
| Gomme et al. 541 | controlled cohort study |  |  |  |  |  | x | x | vaccinated (trimester comparison) |
| Greenberg et al. 542 | controlled cohort study |  |  | x | x |  |  |  | vaccinated vs unvaccinated |
| Griffin et al. 543 | controlled cohort study |  |  | x | x |  |  |  | vaccinated vs unvaccinated |
| Gunatilaka et al. 371 | controlled cohort study |  |  |  | x |  |  |  | vaccinated (influenza, pertusis, both) vs unvaccinated |
| Hall et al. 544 | controlled cohort study |  |  | x | x |  |  | x | vaccinated vs unvaccinated ; 0-13 w vs 27-36 w |
| Hall et al. 501 | case control study |  |  | x |  |  |  | x | vaccinated vs unvaccinated |
| Halperin et al. 545 | RCT |  |  | x | x | x | x |  | Td vs Tdap |
| Hardy-Fairbanks et al. 546 | controlled cohort study |  |  |  |  | x | x |  | vaccinated vs unvaccinated |
| Healy et al. 547 | controlled cohort study |  |  |  |  |  | x | x | vaccinated (T3) vs unvaccinated, timing comparison (w27-31 vs w 32-36) |
| Hincapie-Palacio et al. 548 | controlled cohort study |  |  |  | x | x | x | x | vaccinated vs unvaccinated |
| Hoang et al. 549 | RCT |  |  | x | x | x | x |  | vaccinated (Tdap vs tetanus) |
| Immink et al. 550 | controlled cohort study |  |  | x | x |  |  | x | vaccinated (20-24 w vs 30-33w), vaccinated vs unvaccinated |
| Immink et al. 609 | controlled cohort study |  |  |  |  | x | x | x | timing comparison |
| Jones et al. 551 | RCT |  |  | x | x | x | x |  | unvaccinated vs TdaP 5 -IPV (low dose diphtheria toxoid, tetanus toxoid, acellular pertussis [five antigens] and inactivated polio) vs TdaP 3-IPV (three pertussis antigens) |
| Juscamayta-Lopez et al. 552 | test-negative design study |  | x |  |  |  |  |  | vaccinated vs unvaccinated |
| Kandeil et al. 553 | SR |  | x |  |  |  |  | x | vaccinated vs unvaccinated |
| Kent et al. 554 | controlled cohort study |  |  |  |  |  | x |  | vaccinated vs unvaccinated |
| Kerr et al. 555 | case control study |  |  |  | x |  |  | x | vaccinated vs unvaccinated |
| Kharbanda et al. 556 | controlled cohort study |  |  | x | x |  |  | x | vaccinated vs unvaccinated |
| Kharbanda et al. 557 | controlled cohort study |  |  | x |  |  |  |  | vaccinated vs unvaccinated |
| Khodr et al. 558 | controlled cohort study |  | x |  | x |  |  | x | Tdap vaccinated vs unvaccinated, subgroups of influenza vaccinated vs unvaccinated within each group |
| Kildegaard et al. 606 | controlled cohort study |  | x | x | x |  |  |  | vaccinated vs unvaccinated |
| Knuutila et al. 559 | controlled cohort study |  |  | x | x | x | x |  | vaccinated vs unvaccinated |
| Ladhani et al. 389 | controlled cohort study |  |  |  |  |  | x | x | vaccinated vs unvaccinated mothers |
| Laverty et al. 560 | controlled cohort study |  | x |  | x |  |  |  | vaccinated (Tdap) vs unvaccinated - propensity score matched |
| Layton et al. 561 | controlled cohort study |  |  | x | x |  |  | x | vaccinated (optimal prenatal (≥27 w) vs early prenatal (prior to 27 w)) vs unvaccinated (postpartum/ none) |
| Lima et al. 562 | controlled cohort study |  |  |  |  | x | x | x | vaccinated vs unvaccinated |
| Machado et al. 563 | controlled cohort study |  | x |  |  |  |  |  | descriptive ecological temporal trend study- pre and post-vaccination period |
| Maertens et al. 565 | controlled cohort study |  |  |  |  | x | x | x | vaccinated vs unvaccinated |
| Maertens et al. 564 | controlled cohort study |  |  | x | x | x | x |  | vaccinated vs unvaccinated |
| Maertens et al. 566 | controlled cohort study |  |  |  | x |  | x |  | vaccinated vs unvaccinated |
| Maertens et al. 567 | controlled cohort study |  |  |  |  | x | x |  | vaccinated (Tdap) vs unvaccinated |
| McMillan et al. 568 | SR |  | x | x | x |  |  |  | vaccinated vs unvaccinated |
| Merdrignac et al. 569 | case control study |  | x |  | x |  |  |  | vaccinated vs unvaccinated |
| Mohammed et al. 570 | controlled cohort study |  |  | x | x |  |  |  | vaccinated vs unvaccinated |
| Morgan et al. 571 | controlled cohort study |  |  | x | x |  |  |  | vaccinated vs unvaccinated |
| Mott et al. 572 | controlled cohort study |  | x |  |  |  |  |  | vaccinated vs unvaccinated |
| Munoz et al. 573 | RCT |  |  | x | x | x | x |  | vaccinated vs placebo |
| Naidu et al. 574 | controlled cohort study |  |  |  |  |  | x | x | vaccinated (28-32 weeks’ vs 33-36 weeks’) vs control (unvaccinated) |
| Nakabembe et al. 610 | RCT |  |  | x | x | x | x |  | vaccine type |
| Nascimento et al. 575 | case control study |  | x |  |  |  |  |  | vaccinated vs unvaccinated |
| Nasser et al. 421 | SR |  |  | x | x |  |  | x | vaccine vs placebo/no vaccine. |
| Nguyen et al. 313 | SR |  | x | x | x |  | x | x | vaccinated vs unvaccinated/other vaccine |
| Orije et al. 576 | controlled cohort study |  |  |  |  |  | x |  | vaccinated vs unvaccinated |
| Panagiotakopoulos et al. 438 | case control study |  |  |  | x |  |  |  | vaccinated vs unvaccinated |
| Perrett et al. 577 | RCT |  |  |  |  |  | x |  | vaccinated vs placebo |
| Perrett et al. 578 | RCT |  |  | x | x | x | x |  | vaccinated vs unvaccinated = G1 (vaccinated during pregnancy and placebo after) vs G2 (placebo during pregnancy and vaccinated after) |
| Petousis-Harris et al. 579 | controlled cohort study |  |  |  | x |  |  |  | vaccinated vs unvaccinated |
| Puthanakit et al. 580 | RCT |  |  | x |  | x |  | x | vaccinated with pertussis-only vaccine vs chemically-inactivated pertussis toxoid |
| Regan et al. 449 | controlled cohort study |  |  | x |  |  |  | x | vaccinated (influenza vs pertussis vs influenza+pertussis) |
| Regan et al. 581 | controlled cohort study |  | x |  |  |  |  | x | vaccinated vs unvaccinated |
| Rice et al. 583 | controlled cohort study |  |  |  |  | x | x |  | vaccinated vs unvaccinated |
| Rice et al. 582 | controlled cohort study |  |  |  |  | x | x |  | vaccinated vs unvaccinated |
| Romanin et al. 584 | case control study |  | x |  |  |  |  | x | vaccinated vs unvaccinated |
| Rowe et al. 454 | controlled cohort study |  | x |  | x |  |  |  | vaccinated vs unvaccinated |
| Ruiz-Botia et al. 585 | controlled cohort study |  | x |  | x |  |  |  | vaccinated vs unvaccinated |
| Sahoo et al. 586 | cross-sectional study |  |  |  |  |  | x |  | Tdap vs TT |
| Sánchez-Salguero et al. 245 | controlled cohort study |  |  |  |  | x |  |  | vaccinated vs unvaccinated |
| Sancovski et al. 587 | controlled cohort study |  |  | x | x |  |  |  | vaccinated vs unvaccinated |
| Sapuan et al. 588 | controlled cohort study |  |  |  |  |  | x |  | vaccinated vs unvaccinated |
| Sartoretti et al. 589 | controlled cohort study |  |  |  |  |  | x | x | timing comparison |
| Saso et al. 611 | RCT |  |  | x |  |  | x |  | vaccine type |
| Saul et al. 590 | case control study |  | x |  |  |  |  |  | vaccinated vs unvaccinated |
| Shakib et al. 591 | case control study |  | x |  | x |  |  |  | vaccinated vs unvaccinated |
| Shi et al. 314 | SR |  | x | x | x |  | x |  | vaccinated vs unvaccinated |
| Simayi et al. 315 | SR |  |  | x | x |  | x |  | vaccinated (Tdap) vs placebo/other vaccine |
| Skoff et al. 592 | case control study |  | x |  |  |  |  | x | vaccinated vs unvaccinated |
| Skoff et al. 607 | case control study |  | x |  |  |  |  |  | vaccinated vs unvaccinated |
| Sompagdee et al. 593 | RCT |  |  | x | x | x |  |  | vaccinated (Tdap vs Td) |
| Sukumaran et al. 469 | case control study |  | x |  | x |  |  |  | vaccinated vs unvaccinated |
| Switzer et al. 594 | SR |  | x |  |  |  | x | x | vaccinated vs unvaccinated, timing |
| Tseng et al. 595 | controlled cohort study |  |  | x | x |  |  |  | vaccinated vs unvaccinated |
| Vargas-Zambrano et al. 596 | case control study |  | x |  |  |  |  | x | vaccinated (T1, T2, T3) vs unvaccinated |
| Vaz-de-Lima et al. 598 | cross sectional study |  |  |  |  | x | x | x | vaccinated vs unvaccinated |
| Vaz-de-Lima et al. 597 | controlled cohort study |  |  |  |  | x | x |  | vaccinated vs unvaccinated |
| Villarreal Perez et al. 599 | RCT |  |  | x |  | x | x |  | vaccine vs placebo |
| Vygen-Bonnet et al. 600 | SR |  | x | x | x |  |  |  | vaccinated (Tdap) vs unvaccinated (placebo/no Tdap/TT) |
| Wanlapakorn et al. 601 | RCT |  |  |  |  | x | x |  | vaccinated ( aP vs wP) vs unvaccinated |
| Winter et al. 603 | controlled cohort study |  | x |  |  |  |  | x | vaccinated pregnant women vs vaccinated post-partum (ie. No vaccination) |
| Winter et al. 602 | controlled cohort study |  | x |  | x |  |  | x | vaccinated vs unvaccinated |
| Zerbo et al. 604 | controlled cohort study |  |  |  | x |  |  | x | vaccinated vs unvaccinated |

## Supplementary information 11: Studies included for maternal RSV vaccination

235,316-318,346,612-637

235 Chittajallu, L. V. S., Kaku, R., Kondadasula, P., Lim, J. Y. & Zhumabekova, A. Safety and Efficacy of Vaccines During Pregnancy: A Systematic Review. *Cureus* **17**, e77176 (2025). https://doi.org:10.7759/cureus.77176

316 Alandijany, T. A., Alandijany, T. A. & Qashqari, F. S. Evaluating the efficacy, safety, and immunogenicity of FDA-approved RSV vaccines: a systematic review of Arexvy, Abrysvo, and mResvia. *Front. Immunol.* **16**, 1624007 (2025). https://doi.org:10.3389/fimmu.2025.1624007

317 Mapindra, M. P. *et al.* Respiratory Syncytial Virus Maternal Vaccination in Infants below 6 Months of Age: Meta-Analysis of Safety, Immunogenicity, and Efficacy. *Neonatology*, 1-12 (2024). https://doi.org:10.1159/000536031

318 Phijffer, E. W. *et al.* Respiratory syncytial virus vaccination during pregnancy for improving infant outcomes. *Cochrane Database Syst. Rev.* **5**, CD015134 (2024). https://doi.org:https://dx.doi.org/10.1002/14651858.CD015134.pub2

346 de Bruin, O. *et al.* Are maternal vaccines effective and safe for mothers and infants? A systematic review and meta-analysis of randomised controlled trials. *BMJ Global Health* **8**, 10 (2023). https://doi.org:10.1136/bmjgh-2023-012376

612 Bebia, Z. *et al.* Safety and Immunogenicity of an Investigational Respiratory Syncytial Virus Vaccine (RSVPreF3) in Mothers and Their Infants: A Phase 2 Randomized Trial. *J. Infect. Dis.* **228**, 299-310 (2023). https://doi.org:10.1093/infdis/jiad024

613 Dieussaert, I. *et al.* RSV Prefusion F Protein-Based Maternal Vaccine - Preterm Birth and Other Outcomes. *N. Engl. J. Med.* **390**, 1009-1021 (2024). https://doi.org:10.1056/NEJMoa2305478

614 Kampmann, B. *et al.* Bivalent Prefusion F Vaccine in Pregnancy to Prevent RSV Illness in Infants. *N. Engl. J. Med.* **388**, 1451-1464 (2023). https://doi.org:10.1056/NEJMoa2216480

615 Ma, J., Chen, L., Tang, S. & Shi, Y. Efficacy and safety of respiratory syncytial virus vaccination during pregnancy to prevent lower respiratory tract illness in newborns and infants: a systematic review and meta-analysis of randomized controlled trials. *Frontiers in Pediatrics* **11**, 1260740 (2023). https://doi.org:10.3389/fped.2023.1260740

616 Madhi, S. A. *et al.* Respiratory Syncytial Virus Vaccination during Pregnancy and Effects in Infants. *N. Engl. J. Med.* **383**, 426-439 (2020). https://doi.org:10.1056/NEJMoa1908380

617 Munoz, F. M., Piedra, P. A. & Glezen, W. P. Safety and immunogenicity of respiratory syncytial virus purified fusion protein-2 vaccine in pregnant women. *Vaccine* **21**, 3465-3467 (2003). https://doi.org:10.1016/s0264-410x(03)00352-9

618 Munoz, F. M. *et al.* Safety and Immunogenicity of a Respiratory Syncytial Virus Fusion (F) Protein Nanoparticle Vaccine in Healthy Third-Trimester Pregnant Women and Their Infants. *J. Infect. Dis.* **220**, 1802-1815 (2019). https://doi.org:10.1093/infdis/jiz390

619 Nyiro, J. U. *et al.* Absence of Association between Cord Specific Antibody Levels and Severe Respiratory Syncytial Virus (RSV) Disease in Early Infants: A Case Control Study from Coastal Kenya. *PLoS ONE [Electronic Resource]* **11**, e0166706 (2016). https://doi.org:10.1371/journal.pone.0166706

620 Simoes, E. A. F. *et al.* Prefusion F Protein-Based Respiratory Syncytial Virus Immunization in Pregnancy. *N. Engl. J. Med.* **386**, 1615-1626 (2022). https://doi.org:10.1056/NEJMoa2106062

621 Madhi, S. A. *et al.* Preterm Birth Frequency and Associated Outcomes From the MATISSE (Maternal Immunization Study for Safety and Efficacy) Maternal Trial of the Bivalent Respiratory Syncytial Virus Prefusion F Protein Vaccine. *Obstet. Gynecol.* **145**, 147‐156 (2025). https://doi.org:10.1097/AOG.0000000000005817

622 Lee, B. *et al.* Real-world effectiveness and safety of nirsevimab, RSV maternal vaccine and RSV vaccines for older adults: a living systematic review and meta-analysis. *Thorax* **80**, 838-848 (2025). https://doi.org:https://dx.doi.org/10.1136/thorax-2025-223376

623 Marchand, G. J., Massoud, A. T., Abdelsattar, A. T. & McCullough, P. A. RSVpreF vaccination in pregnancy: a meta-analysis of maternal-fetal safety and infant efficacy. *Obstetrics & Gynecology Science* **67**, 511-524 (2024). https://doi.org:https://dx.doi.org/10.5468/ogs.24213

624 Banooni, P. *et al.* Efficacy, immunogenicity, and safety of an investigational maternal respiratory syncytial virus prefusion F protein-based vaccine. *Clin. Infect. Dis.* (2025). https://doi.org:10.1093/cid/ciaf033

625 Kuitunen, I. & Haapanen, M. Respiratory Syncytial Virus Vaccination Is Associated With Increased Odds of Preterm Birth. *Acta Paediatr.* **20**, 20 (2025). https://doi.org:https://dx.doi.org/10.1111/apa.17595

626 Blauvelt, C. A. *et al.* Respiratory Syncytial Virus Vaccine and Nirsevimab Uptake Among Pregnant People and Their Neonates. *JAMA network open* **8**, e2460735 (2025). https://doi.org:10.1001/jamanetworkopen.2024.60735

627 Son, M. *et al.* Nonadjuvanted Bivalent Respiratory Syncytial Virus Vaccination and Perinatal Outcomes. *JAMA Network Open* **7** (2024). https://doi.org:10.1001/jamanetworkopen.2024.19268

628 Palmero, M. *et al.* Side Effects Associated With Respiratory Syncytial Virus Prefusion F (RSVpreF) Maternal Vaccination: A Scoping Review. *Cureus* **17**, e88162 (2025). https://doi.org:10.7759/cureus.88162

629 Simões, E. A. F. *et al.* Efficacy, Safety, and Immunogenicity of the MATISSE (Maternal Immunization Study for Safety and Efficacy) Maternal Respiratory Syncytial Virus Prefusion F Protein Vaccine Trial. *Obstet. Gynecol.* **145**, 157‐167 (2025). https://doi.org:10.1097/AOG.0000000000005816

630 Otsuki, T. *et al.* Efficacy and safety of bivalent RSVpreF maternal vaccination to prevent RSV illness in Japanese infants: subset analysis from the pivotal randomized phase 3 MATISSE trial. *Vaccine* **42**, 126041 (2024). https://doi.org:10.1016/j.vaccine.2024.06.009

631 Gentile, A. *et al.* Maternal Immunization With RSVpreF Vaccine: Effectiveness in Preventing Respiratory Syncytial Virus-associated Hospitalizations in Infants Under 6 Months in Argentina: Multicenter Case-control Study. *Pediatr. Infect. Dis. J.* **44**, 988-994 (2025). https://doi.org:https://dx.doi.org/10.1097/INF.0000000000004878

632 Jasset, O. J. *et al.* Enhanced placental antibody transfer efficiency with longer interval between maternal respiratory syncytial virus vaccination and birth. *Am. J. Obstet. Gynecol.* **232**, 554.e551-554.e515 (2025). https://doi.org:https://dx.doi.org/10.1016/j.ajog.2024.10.053

633 Perez Marc, G. *et al.* Real-world effectiveness of RSVpreF vaccination during pregnancy against RSV-associated lower respiratory tract disease leading to hospitalisation in infants during the 2024 RSV season in Argentina (BERNI study): a multicentre, retrospective, test-negative, case-control study. *The Lancet Infectious Diseases* **25**, 1044-1054 (2025). https://doi.org:https://dx.doi.org/10.1016/S1473-3099(25)00156-2

634 Razai, M. S. *et al.* Perinatal outcomes and uptake of RSV vaccine during pregnancy in South London: a cross-sectional study. *BMJ Open* **15**, e101592 (2025). https://doi.org:https://dx.doi.org/10.1136/bmjopen-2025-101592

635 Saif-Ur-Rahman, K. M. *et al.* Efficacy and safety of respiratory syncytial virus vaccines. *Cochrane Database Syst. Rev.* **9**, CD016131 (2025). https://doi.org:https://dx.doi.org/10.1002/14651858.CD016131

636 Scruzzi, G. F. *et al.* Evaluation of the effectiveness of the respiratory syncytial virus vaccine in children under 6 months of age in Cordoba, Argentina. *Arch. Argent. Pediatr.*, e202510741 (2025). https://doi.org:https://dx.doi.org/10.5546/aap.2025-10741.eng

637 Williams, T. C. *et al.* Bivalent prefusion F vaccination in pregnancy and respiratory syncytial virus hospitalisation in infants in the UK: results of a multicentre, test-negative, case-control study. *The Lancet Child & Adolescent Health* **9**, 655-662 (2025). https://doi.org:https://dx.doi.org/10.1016/S2352-4642(25)00155-5

## Supplementary information 12: Characteristics of maternal RSV studies and evidence syntheses

| Author | Study Design | Efficacy maternal health outcome | Efficacy infant health outcome | Harms maternal health | Harms infant health | Immunogenicity Mother | Immunogenicity Child | Timing during pregnancy (e.g. first trimester vs. third trimester) | Comparison |
| --- | --- | --- | --- | --- | --- | --- | --- | --- | --- |
| Alandijany et al 2025 316 | SR |  | x | x |  | x | x |  | vaccinated vs placebo or unvaccinated |
| Banooni et al. 2025 624 | RCT | x | x | x | x | x | x |  | vaccinated vs placebo |
| Bebia et al. 2023 612 | RCT |  |  | x | x | x | x |  | vaccine vs placebo |
| Blauvelt et al. 2025 626 | Case control study |  |  | x | x |  |  |  | vaccinated vs unvaccinated |
| Chittajallu et al. 2025 235 | SR |  |  | x | x | x | x |  | vaccinated vs unvaccinated or placebo |
| De Bruin et al. 2023 346 | SR |  | x |  | x |  |  |  | vaccine vs placebo/no vaccine |
| Dieussaert et al. 2024 613 | RCT |  | x | x | x |  |  | x | vaccine vs placebo |
| Gentile et al. 2025 631 | Test-negative |  | x |  |  |  |  |  | vaccinated vs unvaccinated |
| Jasset at al. 2025 632 | Controlled cohort study |  |  |  |  | x | x | x | vaccinated vs infected |
| Kampmann et al. 2023 614 | RCT |  | x | x | x |  |  |  | vaccine vs placebo |
| Kuitunen et al. 2025 625 | RR |  |  |  | x |  |  |  | vaccinated vs placebo or unvaccinated |
| Lee et al. 2025 495 | SR |  |  | x | x |  |  |  | vaccinated vs unvaccinated |
| Ma et al. 2023 615 | SR |  | x | x | x |  |  |  | vaccine vs placebo |
| Madhi et al. 2020 616 | RCT | x | x | x | x | x | x |  | vaccine vs placebo |
| Madhi et al. 2025 621 | RCT |  |  |  | x |  |  | x | vaccinated vs placebo |
| Mapindra et al. 2024 317 | SR |  | x | x | x | x | x |  | vaccine vs placebo |
| Marchand et al. 2024 623 | SR |  | x | x | x |  |  |  | vaccinated vs placebo |
| Munoz et al. 2003 617 | RCT |  | x | x | x | x | x |  | vaccine vs placebo |
| Munoz et al. 2019 618 | RCT | x | x | x | x | x | x |  | vaccine vs placebo |
| Nyiro et al. 2016 619 | Case control study |  |  |  |  |  | x |  | vaccinated vs unvaccinated |
| Otsuki et al. 2024 630 | RCT |  | x | x | x |  |  |  | vaccinated vs placebo |
| Palermo et al. 2025 628 | Scoping Review |  |  | x |  |  |  |  | vaccinated vs unvaccinated |
| Perez et al. 2025 633 | Test-negative |  | x |  |  |  |  |  | vaccinated vs unvaccinated |
| Phijffer et al. 2024 318 | SR |  | x | x | x |  |  |  | vaccinated vs placebo |
| Razai et al. 2025 634 | Controlled cross-sectional study |  |  | x | x |  |  |  | vaccinated vs unvaccinated |
| Saif-Ur-Rahman et al. 2025 635 | SR |  | x | x | x |  |  |  | vaccinated vs placebo |
| Scruzzi et al. 2025 636 | Case control study |  | X |  |  |  |  |  | vaccinated vs unvaccinated |
| Simoes et al. 2022 620 | RCT |  | x | x | x | x | x |  | vaccine vs placebo |
| Simoes et al. 2025 629 | RCT |  | x | x | x | x | x |  | vaccinated vs placebo |
| Son et al. 2024 627 | Controlled cohort study |  |  | x | x |  |  |  | vaccinated vs unvaccinated |
| Williams et al. 2025 637 | Test-negative |  | x |  |  |  |  |  | vaccinated vs unvaccinated |

## Supplementary information 13: Preferred Reporting Items for Systematic reviews and Meta-Analyses extension for Scoping Reviews (PRISMA-ScR) Checklist

| **SECTION** | **ITEM** | **PRISMA-ScR CHECKLIST ITEM** | **REPORTED ON PAGE #** |
| --- | --- | --- | --- |
| **TITLE** | | | |
| Title | 1 | Identify the report as a scoping review. | p.1 |
| **ABSTRACT** | | | |
| Structured summary | 2 | Provide a structured summary that includes (as applicable): background, objectives, eligibility criteria, sources of evidence, charting methods, results, and conclusions that relate to the review questions and objectives. | p.3 |
| **INTRODUCTION** | | | |
| Rationale | 3 | Describe the rationale for the review in the context of what is already known. Explain why the review questions/objectives lend themselves to a scoping review approach. | p.4 |
| Objectives | 4 | Provide an explicit statement of the questions and objectives being addressed with reference to their key elements (e.g., population or participants, concepts, and context) or other relevant key elements used to conceptualize the review questions and/or objectives. | p.5 |
| **METHODS** | | | |
| Protocol and registration | 5 | Indicate whether a review protocol exists; state if and where it can be accessed (e.g., a Web address); and if available, provide registration information, including the registration number. | p.17 |
| Eligibility criteria | 6 | Specify characteristics of the sources of evidence used as eligibility criteria (e.g., years considered, language, and publication status), and provide a rationale. | p.17, Table 1 |
| Information sources* | 7 | Describe all information sources in the search (e.g., databases with dates of coverage and contact with authors to identify additional sources), as well as the date the most recent search was executed. | p.17-18, |
| Search | 8 | Present the full electronic search strategy for at least 1 database, including any limits used, such that it could be repeated. | supplementary information 14 |
| Selection of sources of evidence† | 9 | State the process for selecting sources of evidence (i.e., screening and eligibility) included in the scoping review. | p.18 |
| Data charting process‡ | 10 | Describe the methods of charting data from the included sources of evidence (e.g., calibrated forms or forms that have been tested by the team before their use, and whether data charting was done independently or in duplicate) and any processes for obtaining and confirming data from investigators. | p.18 |
| Data items | 11 | List and define all variables for which data were sought and any assumptions and simplifications made. | p.18-19 |
| Critical appraisal of individual sources of evidence§ | 12 | If done, provide a rationale for conducting a critical appraisal of included sources of evidence; describe the methods used and how this information was used in any data synthesis (if appropriate). | NA |
| Synthesis of results | 13 | Describe the methods of handling and summarizing the data that were charted. | p.19 |
| **RESULTS** | | | |
| Selection of sources of evidence | 14 | Give numbers of sources of evidence screened, assessed for eligibility, and included in the review, with reasons for exclusions at each stage, ideally using a flow diagram. | p.5, Figure 1 |
| Characteristics of sources of evidence | 15 | For each source of evidence, present characteristics for which data were charted and provide the citations. | Click here to enter text. |
| Critical appraisal within sources of evidence | 16 | If done, present data on critical appraisal of included sources of evidence (see item 12). | NA |
| Results of individual sources of evidence | 17 | For each included source of evidence, present the relevant data that were charted that relate to the review questions and objectives. | p.5-12 |
| Synthesis of results | 18 | Summarize and/or present the charting results as they relate to the review questions and objectives. | Figures 2-5 |
| **DISCUSSION** | | | |
| Summary of evidence | 19 | Summarize the main results (including an overview of concepts, themes, and types of evidence available), link to the review questions and objectives, and consider the relevance to key groups. | p.12-13 |
| Limitations | 20 | Discuss the limitations of the scoping review process. | p.14-15 |
| Conclusions | 21 | Provide a general interpretation of the results with respect to the review questions and objectives, as well as potential implications and/or next steps. | p.15-16 |
| **FUNDING** | | | |
| Funding | 22 | Describe sources of funding for the included sources of evidence, as well as sources of funding for the scoping review. Describe the role of the funders of the scoping review. | p.20 |

## Supplementary information 14: Search strategies

**Overview**

| Search* | Database name, time span, and host | Date searched | Work sheet | Hits | Comment |
| --- | --- | --- | --- | --- | --- |
| Originals search 2024 | Ovid MEDLINE(R) ALL 1946 to April 12, 2024 | 15-Apr-24 | Medline | 3357 |  |
| Embase.com (Elsevier) | 15-Apr-24 | Embase | 3152 | export preprints seperately, excluded conf abstracts |
| Cochrane Database of Systematic Reviews Issue 4 of 12, April 2024, Cochrane Central Register of Controlled Trials Issue 3 of 12, March 2024 (Cochrane Library) | 15-Apr-24 | Clib | 713 | export preprints seperately, exported register entries seperately, excluded conf abstracts |
| COVID-19 L*OVE (app.iloveevidence.com/loves/5e6fdb9669c00e4ac072701d) | 15-Apr-24 | L OVE | 1735 | export preprints seperately, exported register entries seperately, excluded conf abstracts |
| Epistemonikos (epistemonikos.org) | 15-Apr-24 | Epistemonikos | 254 | limited to evidence syntheses |
| International HTA Database (database.inahta.org) | 15-Apr-24 | Inhta | 8 |  |
| ClinicalTrials.gov | 15-Apr-24 | Ctgov | 188 |  |
| World Health Organization International Clinical Trials Registry Platform (ICTRP) (www.who.int/clinical-trials-registry-platform). | 15-Apr-24 | ICTRP | 216 |  |
| Preprint Citation Index (Web of Science) | 15-Apr-24 | PCI | 98 |  |
|  |  |  | **Total (before deduplication)** | **9721** | Deduplication of published articles and preprints using Deduklick, Study registers manual deduplication |
|  |  |  | **Total (after deduplication)** | **5313** |  |

| **Bibliographic databases** | | |  | |  |  |  | |
| --- | --- | --- | --- | --- | --- | --- | --- | --- |
| Search* | Database name, time span, and host | Date searched | | Work sheet | | Hits | Comment |
| Pre-publication update 2025 | Ovid MEDLINE(R) ALL 1946 to October 28, 2025 | 29.Oct.2025 | | Medline(2) | | 4035 | exported preprints seperately |
| Embase.com (Elsevier) | 29.Oct.2025 | | Embase(2) | | 3861 | export preprints seperately, exported CTgov entries seperately, excluded conf abstracts |
| Cochrane Database of Systematic Reviews Issue 4 of 12, April 2024, Cochrane Central Register of Controlled Trials Issue 3 of 12, March 2024 (Cochrane Library) | 29.Oct.2025 | | Clib(2) | | 768 | export preprints seperately, exported register entries seperately, excluded conf abstracts |
| COVID-19 L*OVE (app.iloveevidence.com/loves/5e6fdb9669c00e4ac072701d) | 29.Oct.2025 | | L OVE(2) | | 735 | **limited to database entry date:** 15.04.24-29.10.25; export preprints seperately, exported register entries seperately, excluded conf abstracts; removed search results published before 2019 (not Covid-19) |
| Epistemonikos (epistemonikos.org) | 29.Oct.2025 | | Epistemo-nikos(2) | | 132 | **limited to database entry date:** 15.04.24-29.10.25; limited to evidence syntheses |
| International HTA Database (database.inahta.org) | 29.Oct.2025 | | Inhta(2) | | 11 |  |
| Preprint Citation Index (Web of Science) | 29.Oct.2025 | | PCI(2) | | 145 |  |
|  |  |  | | **Total (before deduplica-tion)** | | **9687** |  |
|  |  |  | | **Total (after deduplica-tion)** | | **1132** | Tera Deduplicator, algorithm: Focused |
|  |  |  | |  | |  | Forbes, C., Greenwood, H., Carter, M. et al. Automation of duplicate record detection for systematic reviews: Deduplicator. Syst Rev 13, 206 (2024). https://doi.org/10.1186/s13643-024-02619-9 |

| **Study registers** | |  |  |  |  |
| --- | --- | --- | --- | --- | --- |
| Search* | Database name, time span, and host | Date searched | Work sheet | Hits | Comment |
| Prepublication update | ClinicalTrials.gov | 29.Oct.2025 | Ctgov(2) | 23 | limited to first posted since 15.04.24 |
[truncated: 201,439 more chars]
